# Supplementary material for: Elucidating the mechanism and origin of stereoselectivity in the activation/transformation of an acetic ester catalyzed by an N-heterocyclic carbene
Source: Royal Society of Chemistry journal article supplement (doi:10.1039/d3cp05581g), 2024-01-01
Supplement: d3cp05581g1.pdf [file d3cp05581g1.pdf]

## SUPPORTING INFORMATION FOR

### **Elucidating the mechanism and origin of stereoselectivity on the activation/transformation of an acetic ester catalyzed by an N-heterocyclic carbene**

Pingxin Liang, Haoran Yang, \* Yang Wang\*

#### Content

|                                                                                                                      |     |
|----------------------------------------------------------------------------------------------------------------------|-----|
| Part 1: Deprotonation for generating active NHC.....                                                                 | S2  |
| Part 2: Test of methods and solvation models.....                                                                    | S3  |
| Part 3: Energy profiles for the unfavorable S-configured pathway involved in the reaction<br>between 10 and R2a..... | S4  |
| Part 4: Energy profiles for the unfavorable S-configured pathway involved in the reaction<br>between 10 and R2b..... | S5  |
| Part 5: Possible configurations of the transition states involved in reaction between 10 and<br>R2a.....             | S6  |
| Part 6: Energy profile for the formation of enolate intermediate 26.....                                             | S7  |
| Part 7: Energy profiles for the unfavorable S-configured pathway involved in the reaction<br>between 26 and R2b..... | S8  |
| Part 8: Energy profiles for reaction of the enolate intermediate 26 with R2a catalyzed by<br>NHC-3b.....             | S9  |
| Part 9: derivation of the calculated ee value.....                                                                   | S10 |
| Part 10: Energies of all the stationary points (SP).....                                                             | S11 |
| Part 11: Cartesian coordinates of all the stationary points involved in the calculations.....                        | S13 |

---

\* Corresponding Author: [2017017@email.zzuli.edu.cn](mailto:2017017@email.zzuli.edu.cn) (Wang Y.) and [yanghr@zzuli.edu.cn](mailto:yanghr@zzuli.edu.cn) (Yang H. R.)



## Part 2: Test of methods and solvation models

**Table S1.** Test of different methods and solvation models for stereoselective transition states

| 13-ts | M06-2X |         | B3LYP |         | $\omega$ B97X-D |         |
|-------|--------|---------|-------|---------|-----------------|---------|
|       | SMD    | IEF-PCM | SMD   | IEF-PCM | SMD             | IEF-PCM |
| R     | 0      | 0       | 0     | 0       | 0               | 0       |
| S     | 2.4    | 3.1     | 1.2   | 1.9     | 2.1             | 3.4     |

**Table S2.** Test of different methods and basis sets for stereoselective transition states using IEF-PCM solvation model (L1=6-311+G(d, p), L2=6-311++G(2df, 2pd))

| 13-ts | M06-2X-D3 |     | B3LYP |     | B3LYP-D3 |     | $\omega$ B97X-D |     |
|-------|-----------|-----|-------|-----|----------|-----|-----------------|-----|
|       | L1        | L2  | L1    | L2  | L1       | L2  | L1              | L2  |
| R     | 0         | 0   | 0     | 0   | 0        | 0   | 0               | 0   |
| S     | 4.0       | 4.2 | 1.7   | 1.7 | 2.5      | 2.6 | 3.2             | 3.2 |

### Part 3: Energy profiles for the unfavorable S-configured pathway involved in the reaction between **10** and **R2a**

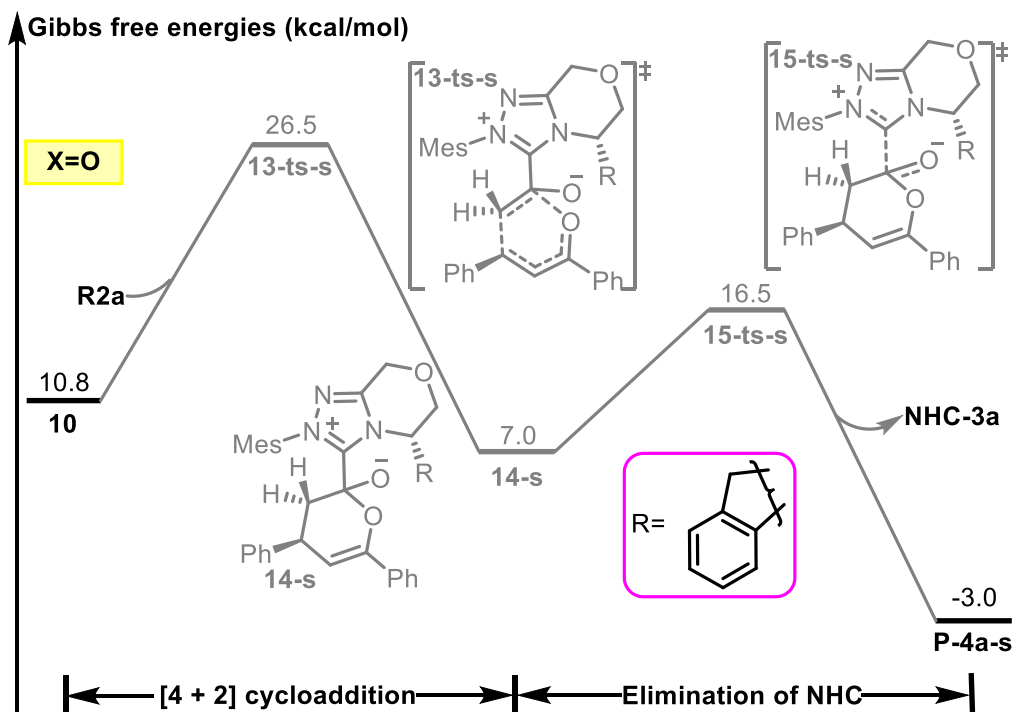

Fig. S3 Energy profiles for the unfavorable S-configured pathway involved in the reaction between **10** and **R2a**

**Part 4: Energy profiles for the unfavorable *S*-configured pathway involved in the reaction between 10 and R2b**

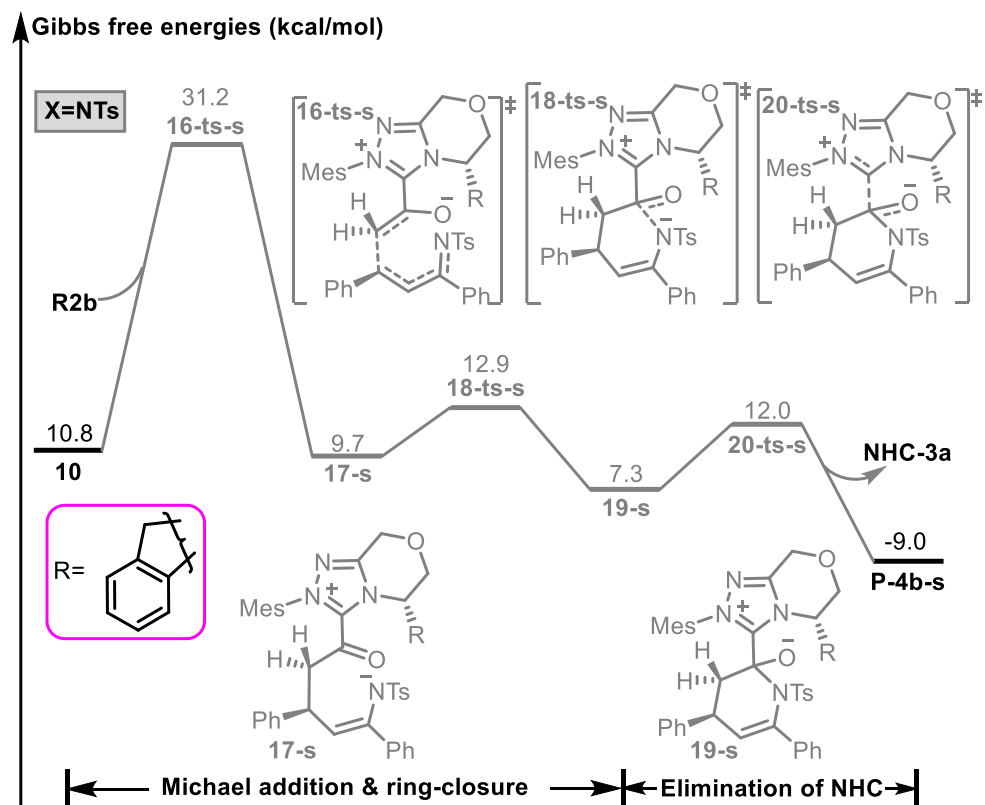

**Fig. S4** Energy profiles for the unfavorable *S*-configured pathway involved in the reaction between 10 and R2b

**Part 5: Possible configurations of the transition states involved in reaction between 10 and R2a**

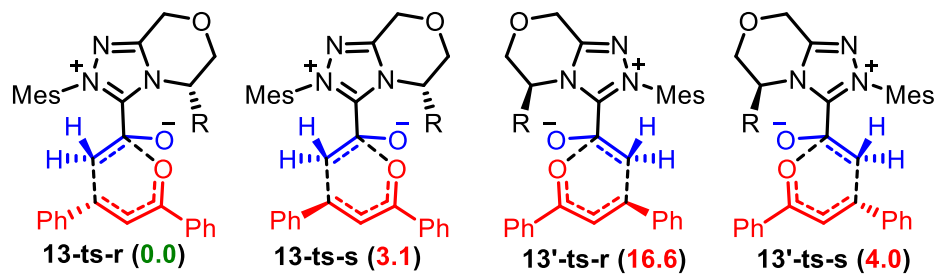

**Fig. S5** The four possible configurations of the transition states involved in [4 + 2] cycloaddition step (The relative Gibbs free energies are given in parentheses and the unit of energy is given in kcal/mol)

## Part 6: Energy profile for the formation of enolate intermediate 26

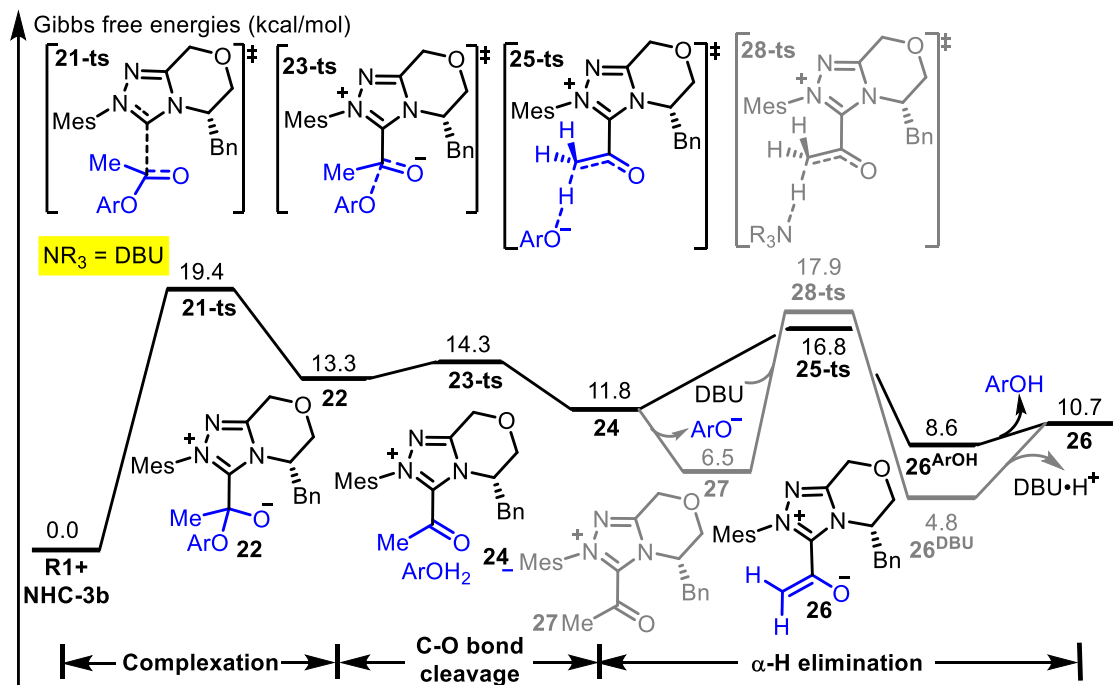

Fig. S6 Energy profile for the formation of the enolate 26 catalyzed by NHC-3b.

**Part 7: Energy profiles for the unfavorable S-configured pathway involved in the reaction between 26 and R2b**

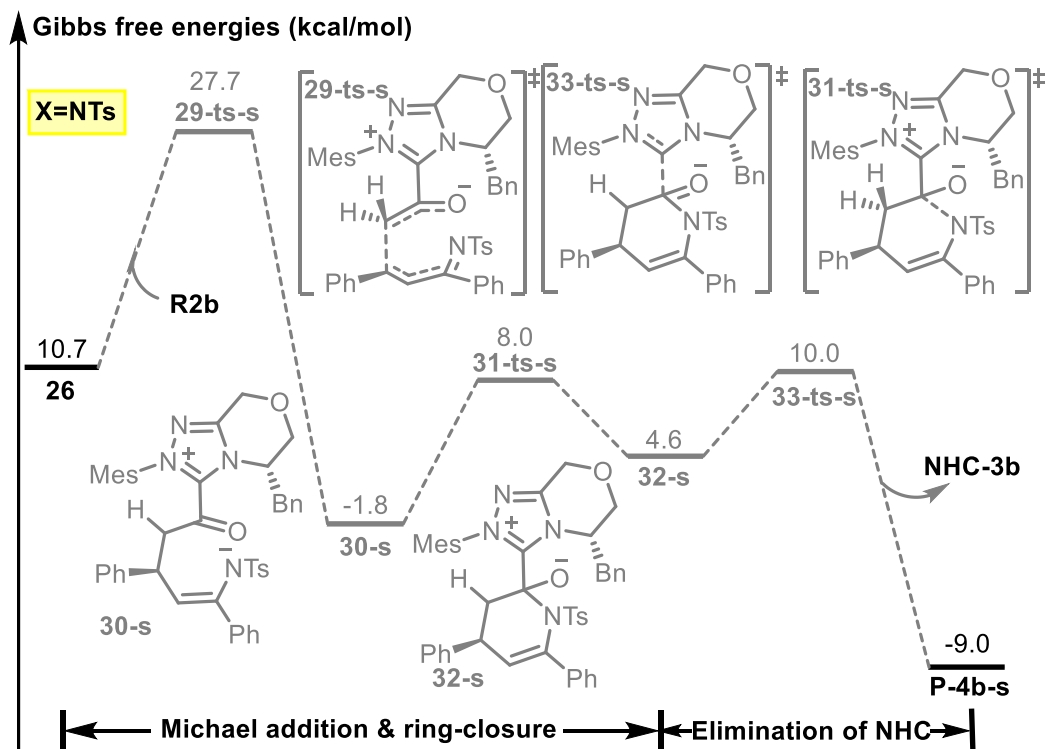

**Fig. S7** Energy profiles for the unfavorable *S*-configured pathway involved in the reaction between 26 and R2b



**Part 8: Energy profiles for reaction of the enolate intermediate 26 with R2a catalyzed by NHC-3b**

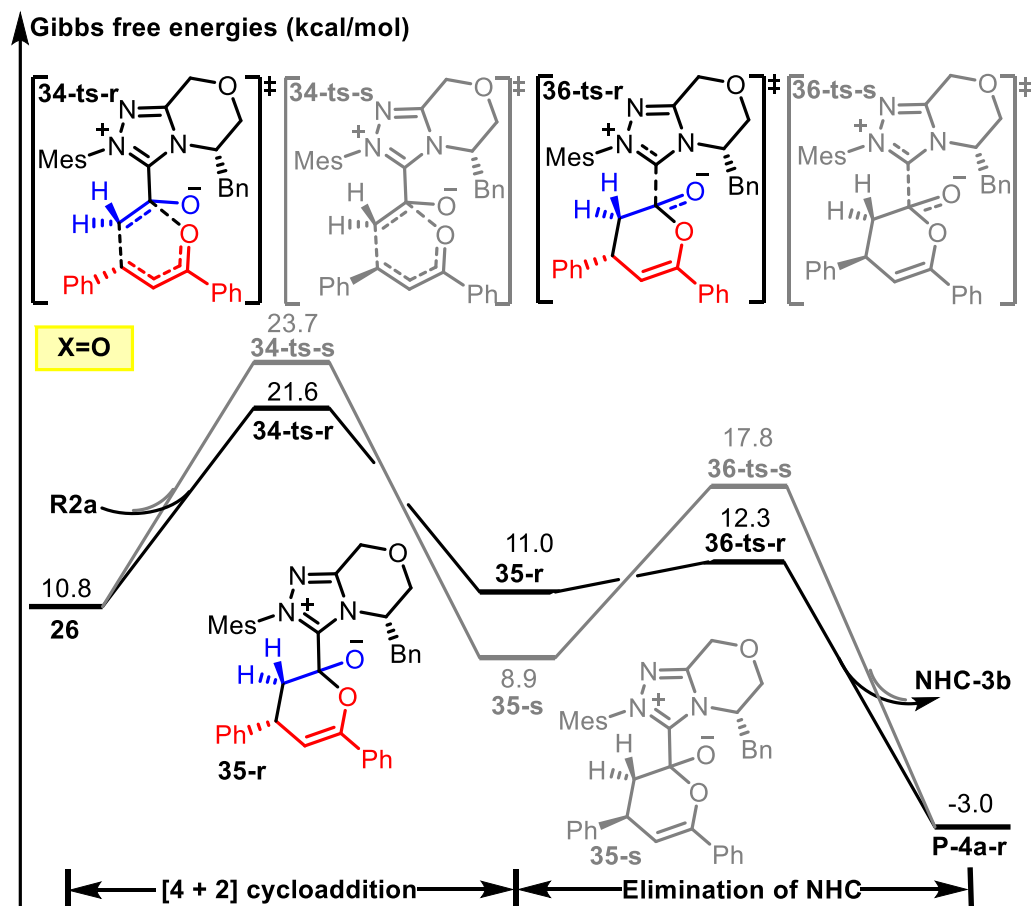

**Fig. S8** Energy profiles for reaction of the enolate intermediate **26** with **R2a** catalyzed by NHC-

**3b**

## Part 9: derivation of the calculated ee value

The predicted ee value is calculated by using Boltzmann distribution along with the stereoselective transition states through the following equations:

$$\frac{[R]}{[S]} = \frac{e^{-G_R^\ddagger/RT}}{e^{-G_S^\ddagger/RT}} = e^{\Delta G^\ddagger/RT} \quad (1)$$

$$ee\% = \frac{[R]-[S]}{[R]+[S]} \times 100\% = \frac{[R]/[S]-1}{[R]/[S]+1} \times 100\% \quad (2)$$

In the equation (1), the  $\Delta G^\ddagger$  is the difference in Gibbs free energies of the stereoselective transition states, R is the gas constant ( $R=8.314 \text{ J}\cdot\text{mol}^{-1}\cdot\text{K}^{-1}$ ), T is the temperature ( $T=298.15 \text{ K}$  in the reaction).

For the present study, the computational results show that the reaction between enolate intermediate **10** and chalcone **R2a** determines the stereoselectivity associated with transition state **13-ts**. The calculated results also indicate that the *R*-configured pathway has the lowest energy barrier and the energy difference between **13-ts-r** and **13-ts-s** is 3.2 kcal/mol. That is, the value of  $\Delta G^\ddagger$  in equation (1) is 3.2 kcal/mol. Thus, we can obtain the value of  $[R]/[S]$ , which is calculated to be 226.9. Then, the value of  $[R]/[S]$  is substituted into equation, the calculated ee value can be obtained by 99.1 %, which is very closed to the experimental observed ee value (98%).

## Part 10: Energies of all the stationary points (SP)

| SP                       | $E^a$        | $G^b$        | $G_{\text{correction}}$ | IF (cm <sup>-1</sup> ) |
|--------------------------|--------------|--------------|-------------------------|------------------------|
| <b>R1a</b>               | -664.56176   | -664.268127  | 0.107155                | –                      |
| <b>R2a</b>               | -653.931953  | -653.590269  | 0.184709                | –                      |
| <b>R2b</b>               | -1452.927381 | -1452.343428 | 0.302559                | –                      |
| <b>NHC-3a</b>            | -1052.168533 | -1051.587702 | 0.330955                | –                      |
| <b>NHC-3b</b>            | -1053.369168 | -1052.765927 | 0.350957                | –                      |
| <b>Pre-NHC-3a</b>        | -1514.669061 | -1513.740975 | 0.581795                | –                      |
| <b>Pre-NHC-3b</b>        | -1053.596428 | -1053.232128 | 0.364300                | –                      |
| <b>DBU</b>               | -462.00664   | -461.68408   | 0.21325                 | –                      |
| <b>DBU•H<sup>+</sup></b> | -462.479238  | -462.148871  | 0.227556                | –                      |
| <b>ArO<sup>•</sup></b>   | -511.465437  | -511.241213  | 0.062763                | –                      |
| <b>ArOH</b>              | -511.927322  | -511.70527   | 0.076086                | –                      |
| <b>TS0</b>               | -1514.666124 | -1513.736442 | 0.577810                | -1216.18               |
| <b>TS1</b>               | -1515.510647 | -1514.913475 | 0.597171                | -1196.17               |
| <b>P-4a-r</b>            | -806.578598  | -806.156727  | 0.22311                 | –                      |
| <b>P-4a-s</b>            | -806.577378  | -806.154633  | 0.224062                | –                      |
| <b>P-4b-r</b>            | -1605.585425 | -1604.917158 | 0.342798                | –                      |
| <b>P-4b-s</b>            | -1605.585676 | -1604.917291 | 0.342822                | –                      |
| <b>5-ts</b>              | -1716.725589 | -1715.829219 | 0.465906                | -141.30                |
| <b>6</b>                 | -1716.734686 | -1715.83665  | 0.467013                | –                      |
| <b>7-ts</b>              | -1716.734892 | -1715.834073 | 0.468004                | -96.17                 |
| <b>8</b>                 | -1716.741688 | -1715.844606 | 0.461303                | –                      |
| <b>9-ts</b>              | -1716.720716 | -1715.824269 | 0.46287                 | -1263.74               |
| <b>10<sup>ArOH</sup></b> | -1716.727606 | -1715.826766 | 0.465990                | –                      |
| <b>10<sup>DBU</sup></b>  | -1204.792513 | -1666.279614 | 0.619203                | –                      |
| <b>10</b>                | -1204.792513 | -1204.129992 | 0.368704                | –                      |
| <b>11</b>                | -1205.254832 | -1204.591945 | 0.38034                 | –                      |
| <b>12-ts</b>             | -1667.266437 | -1666.265597 | 0.61238                 | -1343.33               |
| <b>13-ts-r</b>           | -1858.730703 | -1857.704904 | 0.579701                | -332.44                |
| <b>13'-ts-r</b>          | -1858.704762 | -1857.675085 | 0.580342                | -465.63                |
| <b>13-ts-s</b>           | -1858.724773 | -1857.699357 | 0.578815                | -374.63                |
| <b>13'-ts-s</b>          | -1858.726700 | -1857.698868 | 0.582198                | -332.36                |
| <b>14-r</b>              | -1858.761273 | -1857.731792 | 0.586188                | –                      |
| <b>14-s</b>              | -1858.758406 | -1857.733148 | 0.581358                | –                      |
| <b>15-ts-r</b>           | -1858.741902 | -1857.718707 | 0.581084                | -155.88                |
| <b>15-ts-s</b>           | -1858.742922 | -1857.71924  | 0.580954                | -161.18                |
| <b>16-ts-r</b>           | -2657.719571 | -2656.446679 | 0.699872                | -292.00                |
| <b>16-ts-s</b>           | -2657.71825  | -2656.442217 | 0.70226                 | -459.84                |
| <b>17-r</b>              | -2657.755248 | -2656.474991 | 0.70685                 | –                      |
| <b>17-s</b>              | -2657.752691 | -2656.475965 | 0.702402                | –                      |

|                                     |              |              |              |          |
|-------------------------------------|--------------|--------------|--------------|----------|
| <b>18-ts-r</b>                      | -2657.756438 | -2656.478327 | 0.708248     | -81.28   |
| <b>18-ts-s</b>                      | -2657.753939 | -2656.473708 | 0.708714     | -49.86   |
| <b>19-r</b>                         | -2657.76414  | -2656.483846 | 0.711573     | –        |
| <b>19-s</b>                         | -2657.760477 | -2656.485732 | 0.706311     | –        |
| <b>20-ts-r</b>                      | -2657.751617 | -2656.475841 | 0.70686      | -120.98  |
| <b>20-ts-s</b>                      | -2657.753088 | -2656.477473 | 0.706509     | -128.62  |
| Energies for 3b-catalyzed reactions |              |              |              |          |
| <b>21-ts</b>                        | -1717.931305 | -1717.009705 | 0.489461     | -199.20  |
| <b>22</b>                           | -1717.942551 | -1717.019320 | 0.490955     | –        |
| <b>23-ts</b>                        | -1717.938712 | -1717.014440 | 0.488744     | -84.82   |
| <b>24</b>                           | -1717.941296 | -1717.016701 | 0.487206     | –        |
| <b>25-ts</b>                        | -1717.931423 | -1717.008845 | 0.485374     | -1153.01 |
| <b>26<sup>ArOH</sup></b>            | -1717.947200 | -1717.020828 | 0.488167     | –        |
| <b>26</b>                           | -1205.996041 | -1205.308262 | 0.391434     | –        |
| <b>27</b>                           | -1206.462091 | -1205.776079 | 0.402311     | –        |
| <b>28-ts</b>                        | -1668.467112 | -1667.444204 | 0.632153     | -1293.06 |
| <b>26<sup>DBU</sup></b>             | -1668.481921 | -1667.468302 | 0.636334     | –        |
| <b>29-ts-r</b>                      | -2658.927126 | -2657.648228 | 0.719893     | -243.07  |
| <b>29-ts-s</b>                      | -2658.914007 | -2657.62709  | 0.720332     | -301.06  |
| <b>30-r</b>                         | -2658.982706 | -2657.681197 | 0.727462     | –        |
| <b>30-s</b>                         | -2658.975605 | -2657.673372 | 0.726536     | –        |
| <b>31-ts-r</b>                      | -2658.96611  | -2657.660533 | 0.732362     | -118.30  |
| <b>31-ts-s</b>                      | -2658.964089 | -2657.659522 | 0.730341     | -68.34   |
| <b>32-r</b>                         | -2658.966895 | -2657.662580 | 0.731936     | –        |
| <b>32-s</b>                         | -2658.968034 | -2657.667788 | 0.728928     | –        |
| <b>33-ts-r</b>                      | -2658.953668 | -2657.651146 | 0.729825     | -168.07  |
| <b>33-ts-s</b>                      | -2658.957993 | -2657.658898 | 0.727497     | -142.99  |
| <b>34-ts-r</b>                      | -1859.93438  | -1858.884699 | 0.599969     | -330.74  |
| <b>34-ts-s</b>                      | -1859.931815 | -1858.874944 | 0.600776     | -391.45  |
| <b>35-r</b>                         | 0.606525     | -1858.906536 | -1859.95775  | –        |
| <b>35-s</b>                         | 0.605186     | -1858.909192 | -1859.959808 | –        |
| <b>36-ts-r</b>                      | -1859.953872 | -1858.905754 | 0.604656     | -187.29  |
| <b>36-ts-s</b>                      | -1859.946554 | -1858.895447 | 0.606121     | -191.07  |

<sup>a</sup> The E value is obtained at M06-2X/6-311+g(d, p)//IEF-PCM<sub>acetonitrile</sub> level

<sup>b</sup> The G value is obtained at M06-2X/6-31g(d, p)//IEF-PCM<sub>acetonitrile</sub> level

## Part 11: Cartesian coordinates of all the stationary points involved in the calculations

### R1a

|   |             |             |             |
|---|-------------|-------------|-------------|
| C | -3.16593200 | -0.21425400 | 0.21895000  |
| O | -2.84946100 | -1.08610900 | 0.98199900  |
| C | -4.55823700 | 0.20073300  | -0.14767000 |
| H | -4.69499700 | 1.26121300  | 0.07262000  |
| H | -4.70625800 | 0.06012700  | -1.22065200 |
| H | -5.27251400 | -0.39815300 | 0.41266600  |
| O | -2.25572200 | 0.56263700  | -0.44705100 |
| C | -0.90596400 | 0.33368200  | -0.27561200 |
| C | -0.34816700 | -0.93243000 | -0.45121500 |
| C | -0.11986600 | 1.44781700  | 0.00559900  |
| C | 1.02546400  | -1.08400700 | -0.33318500 |
| H | -0.98053600 | -1.78152200 | -0.67648100 |
| C | 1.25481100  | 1.30133000  | 0.12036300  |
| H | -0.59399700 | 2.41421500  | 0.12935600  |
| C | 1.80035000  | 0.03462800  | -0.04821200 |
| H | 1.49663200  | -2.04988500 | -0.46280800 |
| H | 1.89668900  | 2.14463200  | 0.34005600  |
| N | 3.24963400  | -0.12885200 | 0.07791400  |
| O | 3.91781000  | 0.86123400  | 0.32364100  |
| O | 3.71397200  | -1.24697000 | -0.06787200 |

### R2a

|   |             |             |             |
|---|-------------|-------------|-------------|
| C | -1.18086700 | -0.96589700 | -0.03791800 |
| O | -1.17640300 | -2.18841600 | -0.09720800 |
| C | 0.08211900  | -0.19151800 | 0.03771900  |
| C | 1.25779100  | -0.82596300 | -0.09124000 |
| H | 0.02814600  | 0.87491000  | 0.22275500  |
| H | 1.21761200  | -1.90113300 | -0.26298500 |
| C | 2.59714800  | -0.23434700 | -0.02417700 |
| C | 3.70830400  | -1.07533700 | -0.17150000 |
| C | 2.81303200  | 1.13682300  | 0.18444200  |
| C | 5.00166100  | -0.56580900 | -0.11128400 |
| H | 3.54975100  | -2.13795700 | -0.33330100 |
| C | 4.10335500  | 1.64534700  | 0.24405800  |
| H | 1.97018900  | 1.81101000  | 0.29886900  |
| C | 5.20167500  | 0.79623000  | 0.09717400  |
| H | 5.85070700  | -1.23154700 | -0.22597100 |
| H | 4.25671100  | 2.70731600  | 0.40538400  |

|   |             |             |             |
|---|-------------|-------------|-------------|
| H | 6.20859300  | 1.19793400  | 0.14500100  |
| C | -2.48273300 | -0.22448700 | -0.01933200 |
| C | -2.58401600 | 1.13848000  | -0.31584900 |
| C | -3.64066800 | -0.94950700 | 0.28429300  |
| C | -3.82722000 | 1.76536300  | -0.30453300 |
| H | -1.70465000 | 1.71500200  | -0.58192600 |
| C | -4.87839800 | -0.32059500 | 0.30875500  |
| H | -3.54593600 | -2.00790800 | 0.50283000  |
| C | -4.97286200 | 1.03995700  | 0.01372400  |
| H | -3.90016400 | 2.82069300  | -0.54526500 |
| H | -5.77018200 | -0.88671800 | 0.55653900  |
| H | -5.93948100 | 1.53329500  | 0.02975600  |

**R2b**

|   |             |             |             |
|---|-------------|-------------|-------------|
| C | -0.45269200 | 1.14665900  | -0.03789900 |
| C | -1.75871900 | 0.57329900  | 0.32008200  |
| C | -2.31442700 | -0.45103200 | -0.34765600 |
| H | -2.29815900 | 1.09293300  | 1.10634700  |
| H | -1.76619100 | -0.88865000 | -1.18110100 |
| C | -3.62974800 | -1.04503200 | -0.08845200 |
| C | -4.10455300 | -2.02276500 | -0.97275400 |
| C | -4.42389800 | -0.68547500 | 1.01126900  |
| C | -5.34267200 | -2.62434600 | -0.77092000 |
| H | -3.49344100 | -2.31011100 | -1.82379000 |
| C | -5.65888000 | -1.28656600 | 1.21279000  |
| H | -4.07313300 | 0.05889200  | 1.71902300  |
| C | -6.12279100 | -2.25655800 | 0.32232900  |
| H | -5.69689200 | -3.37913900 | -1.46503200 |
| H | -6.26209900 | -1.00243300 | 2.06860900  |
| H | -7.08846400 | -2.72436200 | 0.48385100  |
| C | -0.34300400 | 2.63076400  | -0.00956300 |
| C | -1.48444600 | 3.43318400  | -0.11896900 |
| C | 0.91474000  | 3.23474500  | 0.11563200  |
| C | -1.36888400 | 4.81963300  | -0.10434200 |
| H | -2.46147700 | 2.97597700  | -0.23862300 |
| C | 1.02563400  | 4.61853900  | 0.13863500  |
| H | 1.79347600  | 2.60472000  | 0.20271900  |
| C | -0.11587100 | 5.41327400  | 0.02807900  |
| H | -2.25733200 | 5.43502500  | -0.19729000 |
| H | 2.00137400  | 5.08015700  | 0.24712600  |
| H | -0.02735400 | 6.49468100  | 0.04629700  |
| N | 0.62260600  | 0.51486700  | -0.38846800 |
| S | 0.81148200  | -1.14301000 | -0.29102700 |
| O | 0.48721600  | -1.70834700 | -1.60452400 |

|   |            |             |             |
|---|------------|-------------|-------------|
| O | 0.19171400 | -1.73863900 | 0.89251800  |
| C | 2.56863200 | -1.20645800 | -0.06633800 |
| C | 3.40355700 | -0.72150500 | -1.07315300 |
| C | 3.08026000 | -1.76991000 | 1.09433000  |
| C | 4.77642100 | -0.80065400 | -0.89718000 |
| H | 2.98093200 | -0.28882700 | -1.97440900 |
| C | 4.46292700 | -1.84241200 | 1.25171100  |
| H | 2.40459700 | -2.14281500 | 1.85589900  |
| C | 5.32511200 | -1.35946200 | 0.26645800  |
| H | 5.43937600 | -0.42567300 | -1.67154300 |
| H | 4.87519300 | -2.28076700 | 2.15544700  |
| C | 6.81912500 | -1.42200500 | 0.44139300  |
| H | 7.09102500 | -1.99595400 | 1.32897600  |
| H | 7.29387200 | -1.88331500 | -0.42869700 |
| H | 7.23637500 | -0.41586100 | 0.54507100  |

**NHC-3a**

|   |             |             |             |
|---|-------------|-------------|-------------|
| C | -2.93368600 | 0.62513700  | 0.73925700  |
| C | -3.78070500 | 0.57715900  | -0.37086100 |
| C | -4.47167300 | 1.71600600  | -0.77164600 |
| C | -4.29668100 | 2.89752100  | -0.05186200 |
| C | -3.44336500 | 2.94228000  | 1.05300300  |
| C | -2.75292500 | 1.80083100  | 1.45801900  |
| C | -2.30452200 | -0.72549400 | 0.98151300  |
| C | -3.22800600 | -1.66708400 | 0.16614200  |
| C | -3.78277700 | -0.80013300 | -0.98541100 |
| H | -5.13741900 | 1.68656000  | -1.62896300 |
| H | -4.83272900 | 3.79263700  | -0.35125300 |
| H | -3.32179700 | 3.87075300  | 1.60135200  |
| H | -2.08608200 | 1.82563900  | 2.31387800  |
| H | -4.05813700 | -1.94837200 | 0.81862400  |
| H | -3.12167900 | -0.82197900 | -1.85976500 |
| H | -2.26322900 | -1.00172500 | 2.03766700  |
| H | -4.76927200 | -1.13622800 | -1.31171700 |
| C | -0.53678700 | -1.74055400 | -0.47115700 |
| C | 0.10196800  | 0.01006000  | 0.80486500  |
| N | 0.72204000  | -1.59129600 | -0.75156000 |
| N | -0.94263100 | -0.80207900 | 0.44147900  |
| N | 1.07862800  | -0.51643200 | 0.03932500  |
| C | -1.48528800 | -2.75261400 | -1.03602500 |
| H | -1.77311800 | -2.46923600 | -2.05645200 |
| H | -1.00259700 | -3.73024400 | -1.08208600 |
| O | -2.61655100 | -2.88758200 | -0.19805600 |
| C | 2.43146600  | -0.05192200 | -0.00968100 |

|   |            |             |             |
|---|------------|-------------|-------------|
| C | 2.70760500 | 1.14789500  | -0.67052200 |
| C | 3.42983100 | -0.82249500 | 0.59354900  |
| C | 4.03435900 | 1.57805800  | -0.70906600 |
| C | 4.74203000 | -0.35677400 | 0.52448100  |
| C | 5.06154400 | 0.84100200  | -0.11838700 |
| H | 4.27078800 | 2.50774200  | -1.22115300 |
| H | 5.53314100 | -0.94183800 | 0.98795200  |
| C | 1.60503800 | 1.93993500  | -1.32210200 |
| H | 1.04618400 | 1.31847800  | -2.02891300 |
| H | 0.88850300 | 2.29633300  | -0.57681500 |
| H | 2.01264600 | 2.79817700  | -1.85891600 |
| C | 6.48430500 | 1.33768800  | -0.14943100 |
| H | 6.64847200 | 2.01533000  | -0.99019100 |
| H | 6.72332700 | 1.88416200  | 0.76869000  |
| H | 7.19044000 | 0.50778000  | -0.22981400 |
| C | 3.08611000 | -2.10801600 | 1.29772400  |
| H | 2.27163800 | -1.95217500 | 2.01194700  |
| H | 2.74731900 | -2.86646900 | 0.58624300  |
| H | 3.95270400 | -2.49694400 | 1.83501100  |

**Pre-NHC-3a**

|   |             |             |             |
|---|-------------|-------------|-------------|
| C | -2.93534100 | 0.62732800  | 0.77026500  |
| C | -3.69926600 | 0.64599200  | -0.40086800 |
| C | -4.32652700 | 1.82060600  | -0.79896700 |
| C | -4.17175700 | 2.96441100  | -0.01523000 |
| C | -3.41145100 | 2.93714900  | 1.15546400  |
| C | -2.78684600 | 1.75926900  | 1.56337900  |
| C | -2.36507000 | -0.74940200 | 0.98658600  |
| C | -3.27044100 | -1.63321700 | 0.09402800  |
| C | -3.71056000 | -0.71003100 | -1.06310200 |
| H | -4.93024200 | 1.84733900  | -1.70044900 |
| H | -4.65783700 | 3.88715800  | -0.31458800 |
| H | -3.31525300 | 3.83451100  | 1.75682600  |
| H | -2.21358300 | 1.72723500  | 2.48531600  |
| H | -4.14527300 | -1.89037800 | 0.69410000  |
| H | -2.99718800 | -0.73162100 | -1.89543900 |
| H | -2.32637200 | -1.08105300 | 2.02492400  |
| H | -4.68617100 | -0.99498300 | -1.46050000 |
| C | -0.56650400 | -1.78149100 | -0.47085200 |
| C | 0.08197700  | -0.10178300 | 0.73501100  |
| N | 0.69855400  | -1.62381600 | -0.75224100 |
| N | -0.98392900 | -0.85238800 | 0.44440000  |
| N | 1.08499600  | -0.56888400 | 0.01201200  |
| C | -1.52240700 | -2.78014600 | -1.04917900 |



|   |             |             |             |
|---|-------------|-------------|-------------|
| H | -1.75661800 | -2.49975900 | -2.08303100 |
| H | -1.05665300 | -3.76619400 | -1.05863800 |
| O | -2.67874900 | -2.86763500 | -0.24789000 |
| C | 2.43886800  | -0.07593900 | -0.02653000 |
| C | 2.70299600  | 1.06752600  | -0.78214100 |
| C | 3.41345700  | -0.78935300 | 0.67585100  |
| C | 4.02415400  | 1.51285300  | -0.80737500 |
| C | 4.71612000  | -0.30121900 | 0.61485600  |
| C | 5.03671000  | 0.84700300  | -0.11462300 |
| H | 4.26664600  | 2.39773300  | -1.38944400 |
| H | 5.49966500  | -0.83203500 | 1.14887000  |
| C | 1.61466800  | 1.78203000  | -1.53954900 |
| H | 1.01068300  | 1.08149300  | -2.12323200 |
| H | 0.94139700  | 2.31679200  | -0.86217900 |
| H | 2.04819300  | 2.51271600  | -2.22298600 |
| C | 6.45010600  | 1.36651100  | -0.13489300 |
| H | 6.63733500  | 1.96807400  | -1.02640500 |
| H | 6.63587400  | 1.99845400  | 0.73932900  |
| H | 7.17110600  | 0.54668300  | -0.10793200 |
| C | 3.06426600  | -2.03070700 | 1.45210600  |
| H | 2.27972600  | -1.83072300 | 2.18832200  |
| H | 2.69670200  | -2.81750600 | 0.78714800  |
| H | 3.94045600  | -2.40733900 | 1.98052600  |
| H | 0.12714200  | 0.72575000  | 1.42797200  |

**Pre-NHC-3b**

|   |             |             |             |
|---|-------------|-------------|-------------|
| C | 0.01130200  | 1.71379300  | -0.32277700 |
| C | 0.92556800  | 2.85466700  | -0.66750800 |
| C | 2.57278200  | 1.76032100  | 0.58934600  |
| C | 1.93468300  | 0.37039900  | 0.58904600  |
| C | -0.54512600 | -0.21164100 | 0.50420800  |
| H | 0.71130300  | 3.20911900  | -1.67612500 |
| H | 3.65718600  | 1.66179000  | 0.64441400  |
| H | 2.00724100  | -0.08035900 | 1.58180900  |
| N | -1.27855800 | 1.62407500  | -0.49901700 |
| N | -1.60707400 | 0.41313000  | 0.02497700  |
| N | 0.49908000  | 0.59632400  | 0.30344700  |
| H | 2.22149700  | 2.34567700  | 1.44875600  |
| H | 0.75184000  | 3.67339000  | 0.04345000  |
| O | 2.26650400  | 2.42103400  | -0.62801300 |
| C | 2.51546600  | -0.56031300 | -0.48697200 |
| H | 1.91542200  | -1.47541900 | -0.51799300 |
| H | 2.41588000  | -0.06108300 | -1.45562700 |
| C | 3.96019800  | -0.89329900 | -0.20540900 |

|   |             |             |             |
|---|-------------|-------------|-------------|
| C | 4.28775000  | -1.87800700 | 0.73081500  |
| C | 4.98863800  | -0.20145400 | -0.85016600 |
| C | 5.61923300  | -2.16748900 | 1.01589800  |
| H | 3.49367300  | -2.42575000 | 1.23239600  |
| C | 6.32190700  | -0.48955200 | -0.56673800 |
| H | 4.73984400  | 0.56591200  | -1.57924800 |
| C | 6.63918300  | -1.47327900 | 0.36705600  |
| H | 5.86094500  | -2.93754000 | 1.74120100  |
| H | 7.11114300  | 0.05255100  | -1.07725900 |
| H | 7.67711100  | -1.70048700 | 0.58702700  |
| C | -2.96912600 | -0.05895700 | 0.01750200  |
| C | -3.74984000 | 0.16910400  | 1.15207400  |
| C | -3.43562300 | -0.69165500 | -1.13656500 |
| C | -5.06630900 | -0.28637500 | 1.11134300  |
| C | -4.75941600 | -1.12583000 | -1.12389500 |
| C | -5.58299200 | -0.93707800 | -0.01130100 |
| H | -5.70421800 | -0.12228900 | 1.97559600  |
| H | -5.15693100 | -1.61980000 | -2.00630800 |
| C | -3.19164200 | 0.88042900  | 2.35593600  |
| H | -2.43421300 | 0.27281000  | 2.86083300  |
| H | -2.72110200 | 1.82640600  | 2.07276600  |
| H | -3.98508800 | 1.09199800  | 3.07316000  |
| C | -7.00070500 | -1.44519100 | -0.01489900 |
| H | -7.03873600 | -2.46916000 | 0.37007900  |
| H | -7.64197900 | -0.82920300 | 0.61879200  |
| H | -7.41341600 | -1.45585800 | -1.02568800 |
| C | -2.54553100 | -0.88447900 | -2.33514900 |
| H | -2.15770800 | 0.07301200  | -2.69467900 |
| H | -1.68600100 | -1.51738300 | -2.09291900 |
| H | -3.09803400 | -1.35915300 | -3.14640700 |
| H | -0.53423100 | -1.18682400 | 0.96914500  |

**TS0**

|   |            |             |             |
|---|------------|-------------|-------------|
| C | 3.32375500 | 1.13401800  | -0.37891300 |
| C | 4.47707700 | 0.89968100  | 0.37679000  |
| C | 4.91734200 | 1.85774400  | 1.28249900  |
| C | 4.18867200 | 3.04055700  | 1.41837500  |
| C | 3.04111900 | 3.26957500  | 0.65689200  |
| C | 2.59747400 | 2.31183000  | -0.25611700 |
| C | 3.05865700 | -0.03760500 | -1.28624200 |
| C | 4.43955400 | -0.73176800 | -1.34010700 |
| C | 5.07654700 | -0.44441000 | 0.03792000  |
| H | 5.81468800 | 1.69345600  | 1.87068400  |
| H | 4.52379800 | 3.79750900  | 2.11992400  |

|   |             |             |             |
|---|-------------|-------------|-------------|
| H | 2.49517500  | 4.20074500  | 0.77192000  |
| H | 1.70492000  | 2.48076400  | -0.85422400 |
| H | 5.02294900  | -0.22023100 | -2.10876700 |
| H | 4.77815500  | -1.19134400 | 0.78345700  |
| H | 2.67826500  | 0.22888300  | -2.27393800 |
| H | 6.16701500  | -0.44059100 | -0.00737100 |
| C | 2.32032000  | -2.33389000 | -0.56106300 |
| C | 0.85793000  | -0.71586500 | -0.23553500 |
| N | 1.27513900  | -2.93097200 | -0.06231300 |
| N | 2.10066300  | -0.98618200 | -0.68248000 |
| N | 0.38864600  | -1.90896500 | 0.12643200  |
| C | 3.64422500  | -2.93995900 | -0.91432600 |
| H | 4.19560000  | -3.16548800 | 0.00696800  |
| H | 3.49162200  | -3.87358400 | -1.45713400 |
| O | 4.37375800  | -2.07732900 | -1.76084700 |
| C | -0.93323100 | -2.14118400 | 0.63913000  |
| C | -1.21902900 | -1.73965900 | 1.94558900  |
| C | -1.88066800 | -2.72052800 | -0.21006700 |
| C | -2.52755700 | -1.91529800 | 2.39551400  |
| C | -3.17116900 | -2.88278200 | 0.29028100  |
| C | -3.51374200 | -2.47627500 | 1.58232400  |
| H | -2.77890800 | -1.61158000 | 3.40825800  |
| H | -3.92978400 | -3.32784900 | -0.34900300 |
| C | -0.14862700 | -1.16526000 | 2.83551700  |
| H | 0.69919000  | -1.85219100 | 2.91698300  |
| H | 0.23777100  | -0.22059300 | 2.44164400  |
| H | -0.54224900 | -0.98031900 | 3.83584100  |
| C | -4.92995400 | -2.62160900 | 2.07485700  |
| H | -4.97497400 | -2.59512400 | 3.16527600  |
| H | -5.55203000 | -1.80526200 | 1.69373100  |
| H | -5.37225000 | -3.55911600 | 1.73012400  |
| C | -1.51510500 | -3.15091600 | -1.60606500 |
| H | -1.03790400 | -2.33777800 | -2.16419900 |
| H | -0.80566500 | -3.98299000 | -1.58523100 |
| H | -2.40401400 | -3.46737200 | -2.15367900 |
| H | 0.12701700  | 0.36836700  | -0.06918100 |
| C | -4.44272600 | 0.99121400  | -2.46954600 |
| C | -4.18255800 | 2.48312200  | -2.24839400 |
| C | -3.97749600 | 2.85410800  | -0.78163300 |
| C | -3.51544300 | 0.11231000  | -1.62770300 |
| C | -2.08003100 | 0.65367700  | -1.59176300 |
| C | -1.80262700 | 1.63059500  | -0.46579400 |
| H | -4.30611700 | 0.75917300  | -3.53103600 |
| H | -5.03384800 | 3.05939600  | -2.62168500 |

|   |             |             |             |
|---|-------------|-------------|-------------|
| H | -4.20768800 | 3.91386500  | -0.65572400 |
| H | -3.89100800 | 0.02247100  | -0.60093400 |
| H | -1.82550400 | 1.12375400  | -2.54819900 |
| C | -2.27336900 | 3.68743900  | 0.77804800  |
| H | -2.88185500 | 3.50049200  | 1.67198200  |
| C | -0.79503600 | 3.65201800  | 1.12349500  |
| H | -0.60563600 | 4.28971200  | 1.98952400  |
| C | -0.41442600 | 2.20796200  | 1.39857900  |
| H | -0.96039000 | 1.84045100  | 2.27820700  |
| N | -0.73667000 | 1.37985800  | 0.24444800  |
| N | -2.61012100 | 2.69582800  | -0.25493400 |
| H | -1.37940700 | -0.17064200 | -1.45138100 |
| H | -3.50169700 | -0.90535900 | -2.02975600 |
| H | -5.48424300 | 0.75828000  | -2.22491700 |
| H | -3.31088700 | 2.82184200  | -2.81782500 |
| H | -4.68121000 | 2.30158900  | -0.14379800 |
| H | -2.55146200 | 4.67044600  | 0.38816500  |
| H | -0.20511900 | 4.03315800  | 0.28257300  |
| H | 0.65474600  | 2.10168400  | 1.60618300  |

#### TS1

|   |             |             |             |
|---|-------------|-------------|-------------|
| C | 1.23679500  | 2.89493800  | -0.85894200 |
| C | 0.70239600  | 4.24665700  | -1.23213800 |
| C | -1.41811500 | 3.26437200  | -1.37345200 |
| C | -1.09118100 | 1.96828900  | -0.62895500 |
| C | 1.09506300  | 0.76721800  | -0.28955700 |
| H | 1.25543000  | 5.02667900  | -0.70814200 |
| H | -2.47138500 | 3.51286600  | -1.23529700 |
| H | -1.47754400 | 1.11544000  | -1.19480400 |
| N | 2.47139600  | 2.50389200  | -0.73128800 |
| N | 2.35706400  | 1.18526700  | -0.37694100 |
| N | 0.37482100  | 1.85959700  | -0.61188400 |
| H | -1.21890900 | 3.14762700  | -2.44683700 |
| H | 0.81031200  | 4.39908800  | -2.31446000 |
| O | -0.65320900 | 4.33454300  | -0.84297900 |
| C | -1.62583700 | 1.93040500  | 0.81174700  |
| H | -1.13085500 | 1.10359000  | 1.33474100  |
| H | -1.33806100 | 2.86183500  | 1.31003700  |
| C | -3.12054500 | 1.72839500  | 0.84368500  |
| C | -3.65357400 | 0.43754000  | 0.75757400  |
| C | -3.99611700 | 2.81351100  | 0.92562600  |
| C | -5.03074000 | 0.23539800  | 0.74735000  |
| H | -2.98384800 | -0.42018900 | 0.71736500  |
| C | -5.37572600 | 2.61498200  | 0.91236900  |

|   |             |             |             |
|---|-------------|-------------|-------------|
| H | -3.59385400 | 3.82018600  | 1.00871000  |
| C | -5.89574900 | 1.32633200  | 0.82088200  |
| H | -5.42823000 | -0.77334400 | 0.69126700  |
| H | -6.04313600 | 3.46795300  | 0.97869000  |
| H | -6.96951100 | 1.17121500  | 0.81463400  |
| C | 3.52731300  | 0.39251900  | -0.12872300 |
| C | 3.72917400  | -0.76630800 | -0.88515100 |
| C | 4.40885100  | 0.80574300  | 0.87844300  |
| C | 4.87530900  | -1.51601100 | -0.61486800 |
| C | 5.53819200  | 0.02219200  | 1.10271400  |
| C | 5.79152200  | -1.13603800 | 0.36436300  |
| H | 5.05413600  | -2.41982900 | -1.19143900 |
| H | 6.23338400  | 0.31988500  | 1.88367900  |
| C | 2.75594600  | -1.22519700 | -1.94100300 |
| H | 1.90150700  | -1.73762900 | -1.48383800 |
| H | 2.36861300  | -0.38976900 | -2.53045300 |
| H | 3.24209900  | -1.92902900 | -2.61824300 |
| C | 7.03836700  | -1.94399500 | 0.61292500  |
| H | 7.89203000  | -1.50362500 | 0.08802500  |
| H | 7.28504400  | -1.96864000 | 1.67691500  |
| H | 6.92232800  | -2.97008400 | 0.25850200  |
| C | 4.14422600  | 2.03303900  | 1.71089000  |
| H | 4.33863700  | 2.94608600  | 1.14285800  |
| H | 3.10082900  | 2.07167700  | 2.03773500  |
| H | 4.78425000  | 2.03154300  | 2.59437800  |
| H | 0.56211900  | -0.40419200 | 0.06503200  |
| C | -2.87771400 | -3.37937500 | -2.52748200 |
| C | -3.62756800 | -3.29910500 | -1.19566300 |
| C | -2.83686600 | -3.85624700 | -0.01449000 |
| C | -1.41313300 | -2.95699500 | -2.39088900 |
| C | -1.25415400 | -1.73870800 | -1.47042500 |
| C | -1.05363500 | -2.08100800 | -0.00693100 |
| H | -3.37989300 | -2.73704000 | -3.25834900 |
| H | -4.55828400 | -3.86865400 | -1.26843900 |
| H | -3.53933600 | -4.13607000 | 0.77270500  |
| H | -0.81054400 | -3.78401600 | -1.99813200 |
| H | -2.12894400 | -1.08324000 | -1.56746100 |
| C | -1.67844500 | -3.20956700 | 2.06084200  |
| H | -1.07541200 | -4.12025200 | 2.16686100  |
| C | -1.00888800 | -2.03730900 | 2.75716500  |
| H | -0.77718300 | -2.30740400 | 3.78929100  |
| C | 0.24899000  | -1.67765000 | 1.98599600  |
| H | 0.99802900  | -2.47245400 | 2.08283000  |
| N | -0.05852300 | -1.46972000 | 0.57709200  |

|   |             |             |             |
|---|-------------|-------------|-------------|
| N | -1.89120200 | -2.92761900 | 0.63260700  |
| H | -0.38156900 | -1.15191800 | -1.76689300 |
| H | -1.00022000 | -2.71824700 | -3.37393500 |
| H | -2.92576300 | -4.40176400 | -2.91583400 |
| H | -3.92063400 | -2.26798300 | -0.96673100 |
| H | -2.30566400 | -4.77287800 | -0.30538200 |
| H | -2.65799700 | -3.40559400 | 2.50295300  |
| H | -1.69200100 | -1.18079500 | 2.77718700  |
| H | 0.70587300  | -0.75538100 | 2.36357400  |

**DBU**

|   |             |             |             |
|---|-------------|-------------|-------------|
| C | 2.94577200  | -0.00104100 | 0.07589700  |
| C | 2.11418500  | -1.14090800 | -0.51846100 |
| C | 0.84785300  | -1.45629900 | 0.27580200  |
| C | 2.07465400  | 1.16332200  | 0.55189900  |
| C | 0.92406600  | 1.46861700  | -0.41732800 |
| C | -0.36901700 | 0.71992800  | -0.14078800 |
| H | 3.65548000  | 0.35437300  | -0.67957500 |
| H | 2.72400000  | -2.04853800 | -0.56059500 |
| H | 0.56669600  | -2.49325200 | 0.07132100  |
| H | 1.65847300  | 0.94370300  | 1.54263000  |
| H | 1.24509500  | 1.27583100  | -1.44873800 |
| C | -1.58325200 | -1.35090400 | 0.28303400  |
| H | -1.68173700 | -1.43755600 | 1.37664000  |
| C | -2.77566300 | -0.60903200 | -0.29195900 |
| H | -3.70548400 | -1.09542500 | 0.01491900  |
| C | -2.71530200 | 0.83342900  | 0.18776800  |
| H | -2.94087500 | 0.87585000  | 1.26296200  |
| N | -1.42093200 | 1.45774800  | -0.05319900 |
| N | -0.33971800 | -0.66512300 | -0.06587800 |
| H | 0.64622200  | 2.52133900  | -0.36291800 |
| H | 2.69297400  | 2.05728600  | 0.67509000  |
| H | 3.54147900  | -0.37791800 | 0.91471200  |
| H | 1.82346400  | -0.91740900 | -1.55035100 |
| H | 1.05571900  | -1.40089100 | 1.35696500  |
| H | -1.52915300 | -2.36754300 | -0.11934000 |
| H | -2.72466800 | -0.63744700 | -1.38594100 |
| H | -3.48291500 | 1.43655200  | -0.30942900 |

**DBU•H<sup>+</sup>**

|   |            |             |             |
|---|------------|-------------|-------------|
| C | 2.96667500 | -0.00437000 | -0.02832200 |
| C | 2.09023600 | -1.09584000 | -0.64376800 |
| C | 0.91035200 | -1.49786700 | 0.23429700  |
| C | 2.12881900 | 1.10841600  | 0.60098400  |

|   |             |             |             |
|---|-------------|-------------|-------------|
| C | 0.93438900  | 1.49842700  | -0.27663800 |
| C | -0.30841400 | 0.66410600  | -0.06635900 |
| H | 3.61492900  | 0.41392400  | -0.80500300 |
| H | 2.68825200  | -1.99489300 | -0.81510300 |
| H | 0.57609900  | -2.49270700 | -0.06151000 |
| H | 1.76444000  | 0.80423800  | 1.58842700  |
| H | 1.19912300  | 1.45443200  | -1.33907200 |
| C | -1.56620100 | -1.34652300 | 0.41185700  |
| H | -1.73319800 | -1.33825800 | 1.49447300  |
| C | -2.72302700 | -0.69843900 | -0.32946400 |
| H | -3.65439100 | -1.19909000 | -0.06152800 |
| C | -2.79097700 | 0.76922400  | 0.04475200  |
| H | -3.14178500 | 0.90074600  | 1.07270100  |
| N | -1.45055700 | 1.33976600  | -0.08071300 |
| N | -0.29767900 | -0.64636900 | 0.12455800  |
| H | 0.64959800  | 2.53241000  | -0.07381000 |
| H | 2.74361300  | 1.99667000  | 0.76287200  |
| H | 3.62032300  | -0.43950500 | 0.73409900  |
| H | 1.70977900  | -0.79450600 | -1.62560400 |
| H | 1.20164600  | -1.55462500 | 1.28986800  |
| H | -1.44400500 | -2.38226300 | 0.09541800  |
| H | -2.57324400 | -0.80575400 | -1.40733100 |
| H | -3.45327200 | 1.32473100  | -0.62021900 |
| H | -1.38136500 | 2.33786300  | -0.21961600 |

**ArO<sup>-</sup>**

|   |             |             |             |
|---|-------------|-------------|-------------|
| O | -3.44847800 | 0.00006200  | -0.00008600 |
| C | -2.19684800 | 0.00006000  | -0.00016200 |
| C | -1.41539500 | -1.22567300 | 0.00014600  |
| C | -1.41510300 | 1.22577100  | -0.00000200 |
| C | -0.04747700 | -1.22191300 | 0.00014200  |
| H | -1.96446900 | -2.16280500 | 0.00041200  |
| C | -0.04714400 | 1.22198200  | 0.00004200  |
| H | -1.96427900 | 2.16300600  | -0.00014400 |
| C | 0.65821100  | 0.00000600  | 0.00000000  |
| H | 0.51601500  | -2.14827500 | 0.00039100  |
| H | 0.51662000  | 2.14821300  | 0.00009800  |
| N | 2.06796900  | -0.00002100 | 0.00002700  |
| O | 2.67457900  | 1.07936400  | 0.00013300  |
| O | 2.67425700  | -1.07959900 | -0.00029000 |

**ArOH**

|   |             |             |             |
|---|-------------|-------------|-------------|
| H | -3.80031100 | -0.79778700 | -0.00051100 |
| O | -3.41310300 | 0.08780500  | -0.00002600 |

|   |             |             |             |
|---|-------------|-------------|-------------|
| C | -2.06838900 | 0.01495300  | 0.00011500  |
| C | -1.36625000 | 1.22775900  | 0.00039600  |
| C | -1.38000600 | -1.20438400 | -0.00033200 |
| C | 0.01644300  | 1.22272000  | 0.00031500  |
| H | -1.92442000 | 2.15662500  | 0.00069200  |
| C | 0.00514600  | -1.21250800 | -0.00033000 |
| H | -1.93106900 | -2.13922800 | -0.00073100 |
| C | 0.68523000  | 0.00061800  | 0.00001300  |
| H | 0.58134600  | 2.14624700  | 0.00055100  |
| H | 0.55947700  | -2.14243500 | -0.00060600 |
| N | 2.14072500  | -0.00747200 | 0.00002700  |
| O | 2.71193000  | -1.08731600 | 0.00090000  |
| O | 2.72328000  | 1.06625300  | -0.00095400 |

**P-4a-r**

|   |             |             |             |
|---|-------------|-------------|-------------|
| C | -0.17114600 | 2.50254300  | 0.36296400  |
| O | -0.33740000 | 3.68283100  | 0.52033000  |
| C | 1.14944800  | 1.78591600  | 0.46327700  |
| H | 1.94463400  | 2.52747800  | 0.38271000  |
| H | 1.19326700  | 1.34393200  | 1.46739100  |
| C | -1.13865900 | 0.37499800  | -0.17948700 |
| O | -1.26460100 | 1.72689700  | 0.12861600  |
| C | 0.02847700  | -0.15555200 | -0.55106900 |
| C | 1.29045400  | 0.66222600  | -0.57523300 |
| H | 0.06194100  | -1.19294300 | -0.86340300 |
| H | 1.40291200  | 1.11609000  | -1.56969300 |
| C | 2.53835100  | -0.15087100 | -0.29166300 |
| C | 3.72053800  | 0.10786500  | -0.98688700 |
| C | 2.53951200  | -1.13029000 | 0.70525800  |
| C | 4.88464700  | -0.59979600 | -0.69468800 |
| H | 3.72803100  | 0.86857800  | -1.76357500 |
| C | 3.70087000  | -1.83981900 | 0.99830400  |
| H | 1.62299400  | -1.33872100 | 1.25242500  |
| C | 4.87717500  | -1.57600000 | 0.29855900  |
| H | 5.79595600  | -0.38887300 | -1.24516700 |
| H | 3.68694900  | -2.60013900 | 1.77296300  |
| H | 5.78212300  | -2.12989800 | 0.52623900  |
| C | -2.43986400 | -0.32007100 | -0.11037400 |
| C | -2.49608000 | -1.71205500 | 0.03420400  |
| C | -3.63351800 | 0.40554300  | -0.19321800 |
| C | -3.72191600 | -2.36544700 | 0.06974700  |
| H | -1.57859000 | -2.28221300 | 0.14048700  |
| C | -4.85907800 | -0.25270200 | -0.15284500 |
| H | -3.59684500 | 1.48411200  | -0.29477600 |



|   |             |             |             |
|---|-------------|-------------|-------------|
| C | -4.90808100 | -1.63842800 | -0.02518400 |
| H | -3.75175300 | -3.44388700 | 0.18562100  |
| H | -5.77799900 | 0.32036700  | -0.22173300 |
| H | -5.86439000 | -2.15006900 | 0.00895700  |

**P-4a-s**

|   |             |             |             |
|---|-------------|-------------|-------------|
| C | 0.39979400  | 2.25132900  | 0.17612800  |
| O | 0.65765100  | 3.23915500  | -0.46194400 |
| C | 1.17043800  | 1.76523700  | 1.37550800  |
| H | 2.13493700  | 2.27422900  | 1.38293900  |
| H | 0.60500200  | 2.09298900  | 2.25578600  |
| C | -0.96986500 | 0.29636500  | 0.41682700  |
| O | -0.69396900 | 1.52747100  | -0.17435300 |
| C | -0.05889400 | -0.35400500 | 1.14302200  |
| C | 1.29893700  | 0.24092600  | 1.42383600  |
| H | -0.28659100 | -1.34835800 | 1.50818500  |
| H | 1.59186700  | -0.03517100 | 2.44214000  |
| C | 2.33714600  | -0.34435300 | 0.47339700  |
| C | 2.78572800  | -1.65111600 | 0.69493300  |
| C | 2.83011100  | 0.35536000  | -0.62930000 |
| C | 3.69894300  | -2.24821800 | -0.16677400 |
| H | 2.41558700  | -2.20142600 | 1.55688500  |
| C | 3.74637100  | -0.24232500 | -1.49523400 |
| H | 2.51798300  | 1.37724000  | -0.82440300 |
| C | 4.18157600  | -1.54388400 | -1.26952300 |
| H | 4.03798700  | -3.26150200 | 0.02419400  |
| H | 4.12026600  | 0.31710900  | -2.34695000 |
| H | 4.89553900  | -2.00555400 | -1.94375700 |
| C | -2.32671400 | -0.17350800 | 0.06983700  |
| C | -2.96774200 | -1.14626300 | 0.84696400  |
| C | -2.98712200 | 0.34886800  | -1.04786100 |
| C | -4.23386400 | -1.60162800 | 0.49844600  |
| H | -2.48504600 | -1.53228200 | 1.73912700  |
| C | -4.25651400 | -0.10697600 | -1.39059800 |
| H | -2.50069300 | 1.10873300  | -1.64837400 |
| C | -4.88273700 | -1.08457800 | -0.62216500 |
| H | -4.72067300 | -2.35314500 | 1.11139100  |
| H | -4.75563000 | 0.30392600  | -2.26217000 |
| H | -5.87353800 | -1.43718700 | -0.88927400 |

**P-4b-r**

|   |             |             |             |
|---|-------------|-------------|-------------|
| C | 0.53891000  | -1.74506900 | -0.23130100 |
| O | -0.11875600 | -2.75911200 | -0.29507500 |
| C | 1.97821000  | -1.64616200 | -0.68857300 |

|   |             |             |             |
|---|-------------|-------------|-------------|
| H | 1.98114000  | -1.27993500 | -1.72274000 |
| H | 2.37609100  | -2.66306700 | -0.68443500 |
| C | 0.71686000  | 0.68809000  | 0.17496600  |
| C | 2.05140500  | 0.64448200  | 0.14174500  |
| C | 2.76578700  | -0.68652400 | 0.20995700  |
| H | 2.60919700  | 1.55145800  | -0.06725900 |
| H | 2.69875300  | -1.06324400 | 1.24223000  |
| C | 4.23755400  | -0.55814100 | -0.13417200 |
| C | 5.05104800  | 0.20294800  | 0.71353900  |
| C | 4.81114200  | -1.14935300 | -1.25934400 |
| C | 6.40395000  | 0.37113000  | 0.44313700  |
| H | 4.61301500  | 0.66573300  | 1.59509700  |
| C | 6.16963900  | -0.98309500 | -1.53266700 |
| H | 4.20851400  | -1.74802400 | -1.93473400 |
| C | 6.96887200  | -0.22361800 | -0.68523100 |
| H | 7.01881300  | 0.96472200  | 1.11214100  |
| H | 6.59976200  | -1.45014000 | -2.41289600 |
| H | 8.02488500  | -0.09474500 | -0.89912400 |
| C | -0.07511200 | 1.91225400  | -0.08481100 |
| C | -1.14345700 | 1.87993700  | -0.98596400 |
| C | 0.27623500  | 3.12093100  | 0.52162900  |
| C | -1.85240500 | 3.04284300  | -1.27352300 |
| H | -1.41311500 | 0.94336500  | -1.46642200 |
| C | -0.43036800 | 4.28284900  | 0.22812500  |
| H | 1.09326300  | 3.13941800  | 1.23675900  |
| C | -1.49817300 | 4.24642500  | -0.66748700 |
| H | -2.68170900 | 3.00649700  | -1.97291000 |
| H | -0.15446100 | 5.21592100  | 0.70862100  |
| H | -2.05316800 | 5.15178700  | -0.89030100 |
| N | 0.00562100  | -0.55574900 | 0.30395500  |
| S | -1.26428800 | -0.68501600 | 1.46197200  |
| O | -1.24539000 | 0.58538000  | 2.16769100  |
| O | -1.05306600 | -1.91924800 | 2.19708900  |
| C | -2.76542600 | -0.80463300 | 0.53564200  |
| C | -3.57400800 | 0.32494900  | 0.44400700  |
| C | -3.12947400 | -2.02154200 | -0.03777300 |
| C | -4.77188400 | 0.23013400  | -0.25484500 |
| H | -3.26546800 | 1.25381800  | 0.91117400  |
| C | -4.33061700 | -2.09031000 | -0.73186500 |
| H | -2.47859300 | -2.88311100 | 0.05633300  |
| C | -5.16335100 | -0.97128400 | -0.85352800 |
| H | -5.41533900 | 1.10153800  | -0.32996200 |
| H | -4.63247500 | -3.03095100 | -1.18293800 |
| C | -6.44801200 | -1.05830400 | -1.63286900 |

|   |             |             |             |
|---|-------------|-------------|-------------|
| H | -6.90183100 | -2.04680000 | -1.53472300 |
| H | -7.16594600 | -0.30783700 | -1.29642600 |
| H | -6.25831800 | -0.88569900 | -2.69711500 |

**P-4b-s**

|   |             |             |             |
|---|-------------|-------------|-------------|
| C | -0.24860000 | -0.36258800 | 1.61158800  |
| O | -1.19953800 | -0.67281600 | 2.29531700  |
| C | 1.07876800  | -1.08732200 | 1.62371800  |
| H | 0.89221200  | -2.07327700 | 2.05368400  |
| H | 1.76442500  | -0.54442900 | 2.28602700  |
| C | 0.82706400  | 1.16893800  | -0.00888000 |
| C | 1.80015200  | 0.28594900  | -0.25741400 |
| C | 1.65651400  | -1.14702400 | 0.20442800  |
| H | 2.74547300  | 0.63047500  | -0.66323600 |
| H | 0.91343700  | -1.64532600 | -0.43806600 |
| C | 2.95735500  | -1.91708700 | 0.07834800  |
| C | 3.64312800  | -2.43757100 | 1.17517500  |
| C | 3.49488500  | -2.10220400 | -1.20085100 |
| C | 4.84208600  | -3.12932200 | 0.99744200  |
| H | 3.25168100  | -2.31230400 | 2.17955500  |
| C | 4.68948000  | -2.78934800 | -1.38048400 |
| H | 2.96555400  | -1.70169900 | -2.06270600 |
| C | 5.36872300  | -3.30669300 | -0.27738600 |
| H | 5.36273800  | -3.52836300 | 1.86215600  |
| H | 5.09071300  | -2.92330500 | -2.37998400 |
| H | 6.30200900  | -3.84330500 | -0.41351100 |
| C | 0.95054700  | 2.62798900  | -0.22901100 |
| C | 1.65314300  | 3.11534600  | -1.33448400 |
| C | 0.41729400  | 3.53242000  | 0.69674600  |
| C | 1.83504900  | 4.48448800  | -1.50250600 |
| H | 2.04082100  | 2.41910000  | -2.07192900 |
| C | 0.59750600  | 4.90044300  | 0.52317300  |
| H | -0.13702200 | 3.16116200  | 1.55422400  |
| C | 1.30892100  | 5.38119500  | -0.57442100 |
| H | 2.37890100  | 4.85133500  | -2.36700000 |
| H | 0.18339100  | 5.59264800  | 1.24904900  |
| H | 1.44654600  | 6.44894500  | -0.70985300 |
| N | -0.33592300 | 0.69129800  | 0.68588400  |
| S | -1.91084900 | 1.18880700  | 0.19896300  |
| O | -1.70205300 | 1.90637900  | -1.04908700 |
| O | -2.56233200 | 1.84825400  | 1.31742600  |
| C | -2.74067600 | -0.33052500 | -0.16478700 |
| C | -2.40245100 | -1.00698300 | -1.33434900 |
| C | -3.73128300 | -0.79215000 | 0.69422200  |

|   |             |             |             |
|---|-------------|-------------|-------------|
| C | -3.07637500 | -2.18354000 | -1.63719500 |
| H | -1.63614800 | -0.61536400 | -1.99643200 |
| C | -4.40026600 | -1.96440900 | 0.36583100  |
| H | -3.96234100 | -0.24052300 | 1.59807200  |
| C | -4.07973400 | -2.67693800 | -0.79502000 |
| H | -2.82658500 | -2.72373000 | -2.54511000 |
| H | -5.18118200 | -2.33537000 | 1.02272500  |
| C | -4.78615700 | -3.96605200 | -1.11819700 |
| H | -4.28898900 | -4.80493700 | -0.62065900 |
| H | -5.82194500 | -3.94443600 | -0.77316700 |
| H | -4.77769100 | -4.16389400 | -2.19179300 |

**5-ts**

|   |             |             |             |
|---|-------------|-------------|-------------|
| C | -1.40394500 | 2.09875600  | 0.31414500  |
| C | -2.11546500 | 3.29178700  | 0.40052300  |
| C | -3.02779800 | 3.48502900  | 1.43180100  |
| C | -3.20697800 | 2.46991100  | 2.37261500  |
| C | -2.47621100 | 1.28344300  | 2.28803100  |
| C | -1.55990500 | 1.08615500  | 1.25741000  |
| C | -0.48576100 | 2.10448900  | -0.88711300 |
| C | -0.48809300 | 3.59613600  | -1.37386200 |
| C | -1.73151000 | 4.23678400  | -0.71105500 |
| H | -3.58494600 | 4.41578700  | 1.51260900  |
| H | -3.91656800 | 2.61001700  | 3.18337500  |
| H | -2.61901500 | 0.51096700  | 3.03655800  |
| H | -0.97604000 | 0.16716500  | 1.19407800  |
| H | -0.55131000 | 3.63755300  | -2.46183400 |
| H | -1.49102000 | 5.24231000  | -0.35739000 |
| H | -0.83427400 | 1.43822400  | -1.67665100 |
| H | -2.54237000 | 4.33277500  | -1.44112300 |
| C | 1.72246700  | 2.53595100  | 0.08358200  |
| C | 1.41168600  | 0.43449200  | -0.60416200 |
| N | 2.82748000  | 1.93377400  | 0.40524400  |
| N | 0.85772700  | 1.67210200  | -0.53196500 |
| N | 2.60329700  | 0.63966000  | -0.02156200 |
| C | 1.30743400  | 3.96708400  | 0.17740300  |
| H | 0.60813200  | 4.11839100  | 1.01027500  |
| H | 2.17097900  | 4.61428500  | 0.31428100  |
| O | 0.71339700  | 4.29421500  | -1.06921800 |
| C | 3.61945800  | -0.35181200 | 0.17497400  |
| C | 3.70618200  | -0.97778300 | 1.42263700  |
| C | 4.48021800  | -0.64272800 | -0.88413300 |
| C | 4.69267200  | -1.94909900 | 1.58376500  |
| C | 5.44916300  | -1.62513800 | -0.67677600 |

|   |             |             |             |
|---|-------------|-------------|-------------|
| C | 5.56491400  | -2.28826800 | 0.54668800  |
| H | 4.78274400  | -2.45262300 | 2.54314900  |
| H | 6.13051500  | -1.86915800 | -1.48659900 |
| C | 2.76537800  | -0.60262300 | 2.53499100  |
| H | 2.86900500  | 0.45557600  | 2.79183100  |
| H | 1.72859300  | -0.77207700 | 2.22164800  |
| H | 2.96688300  | -1.19863200 | 3.42618500  |
| C | 6.60048300  | -3.36573400 | 0.74282200  |
| H | 7.39881600  | -3.28709400 | 0.00209200  |
| H | 7.04168000  | -3.31084500 | 1.73839000  |
| H | 6.14700800  | -4.35964000 | 0.63834600  |
| C | 4.35090600  | 0.07589800  | -2.20034000 |
| H | 3.41602200  | -0.19444400 | -2.70145300 |
| H | 4.33603500  | 1.15987800  | -2.05454900 |
| H | 5.18095800  | -0.17795500 | -2.85996000 |
| C | 0.43016000  | -1.46932300 | -0.61364300 |
| O | 0.40295500  | -1.78559700 | 0.56515200  |
| C | 1.26705600  | -2.16058400 | -1.65785300 |
| H | 0.81029700  | -3.13781400 | -1.84867200 |
| H | 1.28595600  | -1.58723000 | -2.58411600 |
| H | 2.27872200  | -2.31002200 | -1.27459900 |
| O | -0.76594500 | -0.94254500 | -1.21921200 |
| C | -1.97607600 | -1.44058200 | -0.86314200 |
| C | -2.17322400 | -2.68200400 | -0.24260500 |
| C | -3.07972400 | -0.64534300 | -1.21100100 |
| C | -3.46134400 | -3.11399200 | 0.03009000  |
| H | -1.32841400 | -3.29745200 | 0.03063600  |
| C | -4.36454700 | -1.07531500 | -0.94259200 |
| H | -2.90693800 | 0.31285000  | -1.68940200 |
| C | -4.53968800 | -2.30781100 | -0.31868800 |
| H | -3.63762700 | -4.07325600 | 0.50479900  |
| H | -5.22526200 | -0.47261000 | -1.20141400 |
| N | -5.88889100 | -2.76933400 | -0.02651400 |
| O | -6.82512500 | -2.04771300 | -0.34180500 |
| O | -6.02569500 | -3.85023400 | 0.52333700  |

## 6

|   |             |            |             |
|---|-------------|------------|-------------|
| C | -1.05399500 | 2.65013800 | 0.49449500  |
| C | -0.83841600 | 4.00288200 | 0.77574000  |
| C | -1.38722500 | 4.58882300 | 1.91165400  |
| C | -2.16269100 | 3.80594000 | 2.76345800  |
| C | -2.39385300 | 2.46036800 | 2.47253500  |
| C | -1.84685200 | 1.87232800 | 1.33411800  |
| C | -0.41660900 | 2.27197600 | -0.82917200 |

|   |             |             |             |
|---|-------------|-------------|-------------|
| C | -0.14999500 | 3.67304300  | -1.46303800 |
| C | -0.00773400 | 4.66129000  | -0.28988600 |
| H | -1.22097400 | 5.64090700  | 2.12203300  |
| H | -2.60069600 | 4.24814100  | 3.65278500  |
| H | -3.01337200 | 1.86456900  | 3.13501000  |
| H | -2.01800700 | 0.82642400  | 1.12409800  |
| H | -1.05445900 | 3.92420700  | -2.02119700 |
| H | 1.03010700  | 4.76192800  | 0.04477200  |
| H | -1.05432500 | 1.65178900  | -1.45556600 |
| H | -0.35999300 | 5.65839200  | -0.56231700 |
| C | 2.07088100  | 2.07359300  | -1.14716100 |
| C | 1.15459600  | 0.29097800  | -0.26870900 |
| N | 3.06042100  | 1.25759500  | -0.94396400 |
| N | 0.88075500  | 1.54090700  | -0.71460400 |
| N | 2.47538300  | 0.16112200  | -0.38559100 |
| C | 2.15134800  | 3.38473800  | -1.86407400 |
| H | 2.51813800  | 4.17147500  | -1.19591100 |
| H | 2.85646100  | 3.28483000  | -2.69011900 |
| O | 0.89117400  | 3.69084600  | -2.41411100 |
| C | 3.31768800  | -0.94456300 | -0.01093600 |
| C | 3.63961300  | -1.10363800 | 1.33845700  |
| C | 3.78905200  | -1.78088700 | -1.02385000 |
| C | 4.44955500  | -2.18888400 | 1.66965200  |
| C | 4.59733000  | -2.84930000 | -0.63920400 |
| C | 4.92807500  | -3.07251300 | 0.69901300  |
| H | 4.71602900  | -2.34519500 | 2.71190600  |
| H | 4.97522700  | -3.52385700 | -1.40297100 |
| C | 3.11963600  | -0.14822700 | 2.37868500  |
| H | 3.39080800  | 0.88255400  | 2.12774400  |
| H | 2.02641100  | -0.20065100 | 2.43484800  |
| H | 3.54013300  | -0.38563000 | 3.35698600  |
| C | 5.77209400  | -4.25603800 | 1.09446600  |
| H | 6.40422000  | -4.01894000 | 1.95311900  |
| H | 5.13700200  | -5.10206100 | 1.37597600  |
| H | 6.41008200  | -4.57981000 | 0.26958500  |
| C | 3.43863400  | -1.53286300 | -2.46652800 |
| H | 2.35969400  | -1.40303700 | -2.60111800 |
| H | 3.91959200  | -0.62030800 | -2.83106600 |
| H | 3.76388400  | -2.36787000 | -3.08828400 |
| C | 0.18026500  | -0.76086000 | 0.36921800  |
| O | -0.08318000 | -0.47733800 | 1.58114200  |
| C | 0.59059200  | -2.20765800 | 0.05162400  |
| H | -0.28259400 | -2.83821500 | 0.23481500  |
| H | 0.90907200  | -2.34500700 | -0.98541700 |

|   |             |             |             |
|---|-------------|-------------|-------------|
| H | 1.38549000  | -2.52689700 | 0.72675800  |
| O | -0.98895300 | -0.51350900 | -0.66643500 |
| C | -2.17478300 | -1.10109600 | -0.50793800 |
| C | -2.61591200 | -1.70799200 | 0.68747100  |
| C | -3.03455100 | -1.07449000 | -1.62558900 |
| C | -3.87611700 | -2.28004600 | 0.74445800  |
| H | -1.96586500 | -1.70250500 | 1.55240500  |
| C | -4.29189700 | -1.64123200 | -1.56505500 |
| H | -2.67924900 | -0.60524700 | -2.53643300 |
| C | -4.70099700 | -2.24412500 | -0.37604300 |
| H | -4.22987000 | -2.74886900 | 1.65464200  |
| H | -4.95570800 | -1.63004800 | -2.42041800 |
| N | -6.01858200 | -2.84656500 | -0.30699800 |
| O | -6.72390300 | -2.81435000 | -1.30599800 |
| O | -6.36757300 | -3.36222200 | 0.74593600  |

#### 7-ts

|   |             |             |             |
|---|-------------|-------------|-------------|
| C | -0.82329800 | 2.83792300  | 0.43936200  |
| C | -0.42233400 | 4.15281100  | 0.69665000  |
| C | -0.90585000 | 4.83215400  | 1.80963900  |
| C | -1.80298500 | 4.18176600  | 2.65468400  |
| C | -2.21963300 | 2.87699500  | 2.38285200  |
| C | -1.73598300 | 2.19547500  | 1.26867800  |
| C | -0.23452000 | 2.35305600  | -0.86702400 |
| C | 0.15788400  | 3.69862800  | -1.53957500 |
| C | 0.49535800  | 4.66076500  | -0.38344900 |
| H | -0.60190800 | 5.85563400  | 2.00686200  |
| H | -2.19383200 | 4.69984200  | 3.52493600  |
| H | -2.93222700 | 2.39144000  | 3.04175500  |
| H | -2.04354900 | 1.18042900  | 1.05553300  |
| H | -0.74896400 | 4.05766600  | -2.03182100 |
| H | 1.54154300  | 4.57932200  | -0.06707100 |
| H | -0.92389400 | 1.76187700  | -1.46522400 |
| H | 0.31385200  | 5.70205300  | -0.65715300 |
| C | 2.19046700  | 1.86196200  | -1.32243500 |
| C | 1.18260000  | 0.28846500  | -0.19505000 |
| N | 3.09796600  | 0.94891000  | -1.14208900 |
| N | 0.99838900  | 1.51442900  | -0.73373400 |
| N | 2.45681100  | -0.01587200 | -0.43003600 |
| C | 2.36751400  | 3.12257400  | -2.11019200 |
| H | 2.88827200  | 3.87483600  | -1.50617900 |
| H | 2.97986700  | 2.90372800  | -2.98581300 |
| O | 1.11677300  | 3.57906500  | -2.56529500 |
| C | 3.18808200  | -1.18922300 | -0.02873100 |

|   |             |             |             |
|---|-------------|-------------|-------------|
| C | 3.63770000  | -1.27063600 | 1.29149600  |
| C | 3.41507500  | -2.17542300 | -0.98885500 |
| C | 4.32475300  | -2.42753500 | 1.65199600  |
| C | 4.10700100  | -3.31312500 | -0.57520800 |
| C | 4.56068400  | -3.45753400 | 0.73673700  |
| H | 4.68837100  | -2.52599200 | 2.67162400  |
| H | 4.29302000  | -4.10419100 | -1.29662000 |
| C | 3.37843200  | -0.15826800 | 2.27298100  |
| H | 3.73641800  | 0.79857600  | 1.88032500  |
| H | 2.30738400  | -0.05225800 | 2.47517400  |
| H | 3.89001400  | -0.35672200 | 3.21553200  |
| C | 5.28671000  | -4.70385500 | 1.17093200  |
| H | 6.18191300  | -4.45369900 | 1.74591000  |
| H | 4.64669100  | -5.31694200 | 1.81272800  |
| H | 5.58330500  | -5.30909900 | 0.31247000  |
| C | 2.93082900  | -2.01081900 | -2.40447500 |
| H | 1.86932400  | -1.74316400 | -2.43690100 |
| H | 3.47893700  | -1.21103300 | -2.91121600 |
| H | 3.06932300  | -2.93555600 | -2.96572900 |
| C | 0.22729100  | -0.57428800 | 0.66104600  |
| O | -0.04887900 | -0.09113300 | 1.76330300  |
| C | 0.34458600  | -2.07801400 | 0.47718500  |
| H | -0.59764300 | -2.52404700 | 0.80062700  |
| H | 0.54199000  | -2.36184300 | -0.55769000 |
| H | 1.14037400  | -2.45965200 | 1.12154700  |
| O | -1.11107800 | -0.32300800 | -0.64217800 |
| C | -2.27289000 | -0.90053000 | -0.50914500 |
| C | -2.83954000 | -1.23199800 | 0.75369700  |
| C | -3.02926700 | -1.20132100 | -1.67468900 |
| C | -4.08142400 | -1.83079600 | 0.83561300  |
| H | -2.27655400 | -1.00648000 | 1.65288800  |
| C | -4.27265600 | -1.78883500 | -1.59098300 |
| H | -2.59687900 | -0.95179100 | -2.63769400 |
| C | -4.79436700 | -2.10456000 | -0.33256200 |
| H | -4.51520400 | -2.08540200 | 1.79528900  |
| H | -4.84814800 | -2.01622100 | -2.48023200 |
| N | -6.09208800 | -2.72493500 | -0.23955600 |
| O | -6.70619100 | -2.95723800 | -1.27515900 |
| O | -6.53320800 | -2.99817600 | 0.87145400  |

8

|   |            |             |             |
|---|------------|-------------|-------------|
| C | 3.29745200 | -1.22044200 | -0.49802600 |
| C | 4.52672400 | -0.95222200 | 0.11184500  |
| C | 5.67829100 | -0.84219800 | -0.66016100 |



|   |             |             |             |
|---|-------------|-------------|-------------|
| C | 5.57765300  | -1.01797500 | -2.03986400 |
| C | 4.35134200  | -1.31843900 | -2.63809500 |
| C | 3.19557100  | -1.43060500 | -1.86833700 |
| C | 2.22502400  | -1.37321800 | 0.55035700  |
| C | 3.07540200  | -1.69927100 | 1.80145400  |
| C | 4.37908900  | -0.89434500 | 1.61277100  |
| H | 6.63945800  | -0.64323500 | -0.19618000 |
| H | 6.46853100  | -0.94140900 | -2.65536400 |
| H | 4.30236800  | -1.47447400 | -3.71083900 |
| H | 2.23125200  | -1.66668100 | -2.30646000 |
| H | 3.31482500  | -2.76282500 | 1.73047700  |
| H | 4.27423200  | 0.14294500  | 1.95363000  |
| H | 1.47692800  | -2.12407000 | 0.30265800  |
| H | 5.21733100  | -1.33937700 | 2.15210600  |
| C | 1.27882700  | 0.35313000  | 2.11942800  |
| C | 0.66316400  | 0.63853000  | 0.05331900  |
| N | 0.45845600  | 1.36467500  | 2.15145800  |
| N | 1.45278100  | -0.12010100 | 0.84098500  |
| N | 0.09061200  | 1.53092900  | 0.85675400  |
| C | 1.98394200  | -0.23872200 | 3.30070200  |
| H | 2.83219900  | 0.40179100  | 3.57229400  |
| H | 1.29547600  | -0.27085700 | 4.14599100  |
| O | 2.38671500  | -1.55626100 | 3.02276300  |
| C | -0.75038300 | 2.63474100  | 0.46770900  |
| C | -0.14398900 | 3.74628500  | -0.12125700 |
| C | -2.12435200 | 2.53201200  | 0.70500000  |
| C | -0.98612600 | 4.78101700  | -0.52971900 |
| C | -2.91636400 | 3.59517800  | 0.28135600  |
| C | -2.36774500 | 4.71749900  | -0.34666700 |
| H | -0.54766800 | 5.66073400  | -0.99270500 |
| H | -3.98973900 | 3.54601200  | 0.44477900  |
| C | 1.35090900  | 3.83592200  | -0.29265500 |
| H | 1.86871600  | 3.58246400  | 0.63712900  |
| H | 1.71395200  | 3.15698700  | -1.07036800 |
| H | 1.63519600  | 4.85002300  | -0.57579100 |
| C | -3.26238700 | 5.83417000  | -0.81582000 |
| H | -2.68453900 | 6.72183800  | -1.07853100 |
| H | -3.82838600 | 5.52416100  | -1.69947300 |
| H | -3.98590300 | 6.10525900  | -0.04297800 |
| C | -2.71121700 | 1.32657200  | 1.38697500  |
| H | -2.46275400 | 0.40125700  | 0.85540100  |
| H | -2.32059800 | 1.22568000  | 2.40401000  |
| H | -3.79731300 | 1.40993700  | 1.43894400  |
| C | 0.51383400  | 0.71050600  | -1.46529800 |

|   |             |             |             |
|---|-------------|-------------|-------------|
| O | 1.52569000  | 0.83714700  | -2.11089700 |
| C | -0.87147700 | 0.83645400  | -2.03494100 |
| H | -0.89958900 | 0.25079100  | -2.95469300 |
| H | -1.63877400 | 0.47294500  | -1.34984200 |
| H | -1.06243900 | 1.88798200  | -2.27101600 |
| O | 0.08822100  | -1.68165400 | -1.33149100 |
| C | -1.06648500 | -2.08736000 | -0.97980300 |
| C | -2.02935300 | -2.55715300 | -1.93867200 |
| C | -1.49470300 | -2.07886900 | 0.39394000  |
| C | -3.28241500 | -2.97613400 | -1.56407300 |
| H | -1.72943500 | -2.57126400 | -2.98190800 |
| C | -2.75084200 | -2.49886300 | 0.76740200  |
| H | -0.79187700 | -1.73587900 | 1.15044400  |
| C | -3.65036800 | -2.94834000 | -0.20894100 |
| H | -3.99989300 | -3.32789200 | -2.29635900 |
| H | -3.06112900 | -2.48674200 | 1.80607700  |
| N | -4.95380300 | -3.38307700 | 0.17886100  |
| O | -5.26161900 | -3.34677000 | 1.37061600  |
| O | -5.73161500 | -3.77624100 | -0.68941600 |

**9-ts**

|   |             |             |             |
|---|-------------|-------------|-------------|
| C | -3.69232300 | -0.61221700 | 0.43619000  |
| C | -4.57712700 | -0.77062000 | -0.63535500 |
| C | -5.88103600 | -0.29738000 | -0.54445400 |
| C | -6.28935600 | 0.31924200  | 0.63741400  |
| C | -5.41572400 | 0.44011100  | 1.71963400  |
| C | -4.10885600 | -0.03445400 | 1.63029200  |
| C | -2.37014500 | -1.27359100 | 0.12350400  |
| C | -2.78235800 | -2.24887800 | -1.01154300 |
| C | -3.92936900 | -1.53665500 | -1.75919100 |
| H | -6.57397200 | -0.42246800 | -1.37057900 |
| H | -7.30545300 | 0.69042300  | 0.72567600  |
| H | -5.76035800 | 0.89610400  | 2.64176200  |
| H | -3.43219300 | 0.04894000  | 2.47298800  |
| H | -3.18358900 | -3.13793800 | -0.52022700 |
| H | -3.55684000 | -0.85045500 | -2.52847000 |
| H | -1.89490500 | -1.76501600 | 0.97497300  |
| H | -4.59980200 | -2.24701400 | -2.24659500 |
| C | -0.71233700 | -0.55317000 | -1.64779600 |
| C | -0.70826100 | 0.68965500  | 0.13923500  |
| N | 0.20763300  | 0.34204900  | -1.86330100 |
| N | -1.33005800 | -0.35711100 | -0.43512500 |
| N | 0.19152900  | 1.10972300  | -0.74208600 |
| C | -1.06129400 | -1.70231700 | -2.54181300 |

|   |             |             |             |
|---|-------------|-------------|-------------|
| H | -1.67784500 | -1.35938700 | -3.38051500 |
| H | -0.13963000 | -2.12685300 | -2.94310800 |
| O | -1.70140700 | -2.71054000 | -1.79237800 |
| C | 1.05824100  | 2.25179800  | -0.61594200 |
| C | 0.48654400  | 3.52452500  | -0.69510100 |
| C | 2.42698700  | 2.02429100  | -0.44967000 |
| C | 1.34888800  | 4.61140100  | -0.55688600 |
| C | 3.24148100  | 3.14632800  | -0.31619900 |
| C | 2.71992700  | 4.44173800  | -0.35739000 |
| H | 0.93753500  | 5.61547900  | -0.61656600 |
| H | 4.31013400  | 3.00379600  | -0.17749300 |
| C | -0.98536400 | 3.71635400  | -0.95512100 |
| H | -1.30207300 | 3.14471000  | -1.83328700 |
| H | -1.59200500 | 3.38445400  | -0.10732100 |
| H | -1.19959800 | 4.76994800  | -1.13824600 |
| C | 3.62372600  | 5.63247500  | -0.17511700 |
| H | 3.79272100  | 5.82336900  | 0.88947600  |
| H | 4.59868900  | 5.46134200  | -0.63700800 |
| H | 3.18465300  | 6.53288300  | -0.60927900 |
| C | 2.99240200  | 0.62971100  | -0.44036300 |
| H | 2.35086000  | -0.06263700 | 0.11303100  |
| H | 3.07951400  | 0.24112900  | -1.46011900 |
| H | 3.98368200  | 0.61824200  | 0.01669100  |
| C | -0.91894300 | 1.29135600  | 1.53921200  |
| O | -1.97763700 | 1.88442400  | 1.72416100  |
| C | 0.11585200  | 0.94476500  | 2.45133800  |
| H | 0.04988600  | 1.44103900  | 3.41672100  |
| H | -0.05556700 | -0.45223400 | 2.50387700  |
| H | 1.11947500  | 0.92777600  | 2.01948100  |
| O | -0.11529400 | -1.63990200 | 2.23662100  |
| C | 1.01416300  | -2.00453800 | 1.67003900  |
| C | 1.01718300  | -2.65346900 | 0.40994300  |
| C | 2.26082400  | -1.73319900 | 2.28808700  |
| C | 2.20558100  | -2.99231900 | -0.21000700 |
| H | 0.06871300  | -2.88772200 | -0.06672100 |
| C | 3.44963200  | -2.07104200 | 1.67129200  |
| H | 2.26188300  | -1.25458100 | 3.26190200  |
| C | 3.41316200  | -2.69052500 | 0.42149500  |
| H | 2.21507300  | -3.47950600 | -1.17790500 |
| H | 4.40506700  | -1.85964000 | 2.13615500  |
| N | 4.65747300  | -3.02033500 | -0.23949800 |
| O | 5.70760000  | -2.70765100 | 0.30685300  |
| O | 4.60890300  | -3.59516800 | -1.31945600 |

10<sup>ArOH</sup>

|   |             |             |             |
|---|-------------|-------------|-------------|
| C | -3.80697000 | -0.54345200 | 0.39039200  |
| C | -4.65077700 | -0.83067500 | -0.68733900 |
| C | -5.97334100 | -0.40098000 | -0.68603200 |
| C | -6.44770200 | 0.30461000  | 0.41766500  |
| C | -5.61637800 | 0.55523400  | 1.51115900  |
| C | -4.29103500 | 0.12528200  | 1.51100400  |
| C | -2.45280800 | -1.19585800 | 0.19171200  |
| C | -2.79118600 | -2.26406900 | -0.89118400 |
| C | -3.94816300 | -1.66961800 | -1.71882700 |
| H | -6.62746200 | -0.62835700 | -1.52197300 |
| H | -7.47857700 | 0.64371100  | 0.43705300  |
| H | -6.00868100 | 1.08159900  | 2.37500600  |
| H | -3.64196000 | 0.32927200  | 2.35225200  |
| H | -3.16048100 | -3.13802700 | -0.35090400 |
| H | -3.58962600 | -1.04401100 | -2.54323400 |
| H | -2.03578200 | -1.63691400 | 1.09841900  |
| H | -4.57841200 | -2.45039300 | -2.14889300 |
| C | -0.75520600 | -0.53919400 | -1.56298000 |
| C | -0.71917700 | 0.71434400  | 0.22517700  |
| N | 0.18612700  | 0.32959100  | -1.78414500 |
| N | -1.37631000 | -0.31508800 | -0.35635300 |
| N | 0.18545500  | 1.10904000  | -0.66890800 |
| C | -1.07696200 | -1.72307400 | -2.42043500 |
| H | -1.70925200 | -1.43639400 | -3.26735100 |
| H | -0.14364100 | -2.13099000 | -2.81164200 |
| O | -1.67499400 | -2.72176000 | -1.62395700 |
| C | 1.07278100  | 2.23882300  | -0.58553900 |
| C | 0.51597600  | 3.52156700  | -0.61530600 |
| C | 2.44582200  | 1.99540300  | -0.52287200 |
| C | 1.40085600  | 4.59519100  | -0.54114900 |
| C | 3.28589100  | 3.10629200  | -0.45152400 |
| C | 2.78243000  | 4.40762200  | -0.45077500 |
| H | 1.00004400  | 5.60520200  | -0.56399700 |
| H | 4.35959400  | 2.94726800  | -0.39453300 |
| C | -0.96930600 | 3.73590000  | -0.75431300 |
| H | -1.35647900 | 3.20117700  | -1.62793000 |
| H | -1.51645300 | 3.37419800  | 0.12176200  |
| H | -1.18403400 | 4.79765100  | -0.88274100 |
| C | 3.70831700  | 5.59036600  | -0.33642300 |
| H | 3.81837500  | 5.89001300  | 0.71068700  |
| H | 4.70264300  | 5.35261300  | -0.71983100 |
| H | 3.31870900  | 6.45023700  | -0.88573400 |
| C | 2.99782500  | 0.59571500  | -0.54987100 |

|   |             |             |             |
|---|-------------|-------------|-------------|
| H | 2.35753200  | -0.09844600 | 0.00141800  |
| H | 3.06309700  | 0.22404800  | -1.57739100 |
| H | 3.99730100  | 0.56682400  | -0.11121600 |
| C | -0.90098400 | 1.31319000  | 1.62265600  |
| O | -2.02992900 | 1.81027700  | 1.85797100  |
| C | 0.21680500  | 1.17573500  | 2.41762800  |
| H | 0.21359800  | 1.61300400  | 3.40969400  |
| H | -0.05119300 | -0.78667200 | 2.57388600  |
| H | 1.17108600  | 0.89552000  | 1.98176500  |
| O | -0.09742000 | -1.70703100 | 2.19570000  |
| C | 1.08666900  | -2.01826600 | 1.63098100  |
| C | 1.08102100  | -2.70234300 | 0.40670900  |
| C | 2.30104200  | -1.68435700 | 2.25068400  |
| C | 2.28010900  | -3.03613100 | -0.20342500 |
| H | 0.13127000  | -2.95635400 | -0.05601300 |
| C | 3.50093100  | -2.01531100 | 1.64318100  |
| H | 2.28834600  | -1.16988600 | 3.20550100  |
| C | 3.47259600  | -2.68185800 | 0.42164300  |
| H | 2.30257800  | -3.55241800 | -1.15510900 |
| H | 4.45042100  | -1.76222800 | 2.09775600  |
| N | 4.73452900  | -3.00473000 | -0.23257400 |
| O | 5.76904700  | -2.62796400 | 0.29567800  |
| O | 4.69634300  | -3.63270600 | -1.27894700 |

10<sup>DBUH</sup>

|   |             |             |             |
|---|-------------|-------------|-------------|
| C | -1.45778100 | 1.55973200  | 0.55675600  |
| C | -2.29991900 | 2.58549300  | 0.97877100  |
| C | -3.17947400 | 2.36637500  | 2.03793500  |
| C | -3.18182700 | 1.12125100  | 2.66428200  |
| C | -2.31479000 | 0.10514000  | 2.24689600  |
| C | -1.44029900 | 0.31441700  | 1.18218100  |
| C | -0.58363400 | 2.01520400  | -0.58895500 |
| C | -0.83442100 | 3.56389600  | -0.70002400 |
| C | -2.07972500 | 3.84351400  | 0.17724800  |
| H | -3.84036600 | 3.15653100  | 2.37980400  |
| H | -3.85415300 | 0.94073300  | 3.49656200  |
| H | -2.31366800 | -0.84462600 | 2.77331600  |
| H | -0.74264100 | -0.46185300 | 0.86134800  |
| H | -1.01157100 | 3.83133800  | -1.74120600 |
| H | -1.90513600 | 4.72170900  | 0.80640300  |
| H | -0.81109700 | 1.50545900  | -1.52787100 |
| H | -2.94474900 | 4.06855200  | -0.45424700 |
| C | 1.58115500  | 2.57122400  | 0.47710200  |
| C | 1.53559000  | 0.62795200  | -0.52656400 |

|   |             |             |             |
|---|-------------|-------------|-------------|
| N | 2.74231100  | 2.04126400  | 0.72811600  |
| N | 0.82190500  | 1.74158100  | -0.30212200 |
| N | 2.68952800  | 0.82526900  | 0.10255600  |
| C | 0.98329200  | 3.89680000  | 0.82399400  |
| H | 0.31466600  | 3.79987100  | 1.69036500  |
| H | 1.76193200  | 4.62254000  | 1.05492200  |
| O | 0.29434700  | 4.34134500  | -0.33006500 |
| C | 3.80748900  | -0.07799900 | 0.14446800  |
| C | 3.92879100  | -0.91793500 | 1.25393700  |
| C | 4.70996700  | -0.06063900 | -0.91783800 |
| C | 5.03071900  | -1.76809300 | 1.28428200  |
| C | 5.79573100  | -0.93385700 | -0.84066800 |
| C | 5.97035600  | -1.78830100 | 0.24849200  |
| H | 5.15790500  | -2.43401500 | 2.13403400  |
| H | 6.52037400  | -0.94319400 | -1.65041600 |
| C | 2.88572400  | -0.90486600 | 2.33705000  |
| H | 2.80570200  | 0.08429300  | 2.79798900  |
| H | 1.91348800  | -1.15643700 | 1.89955400  |
| H | 3.12764900  | -1.63085100 | 3.11437900  |
| C | 7.13828500  | -2.73845600 | 0.30451500  |
| H | 7.58636500  | -2.75007700 | 1.30111100  |
| H | 6.81348900  | -3.75920600 | 0.08003400  |
| H | 7.90771200  | -2.46370100 | -0.41934700 |
| C | 4.50379500  | 0.85325900  | -2.09643100 |
| H | 3.60978100  | 0.55988700  | -2.65768900 |
| H | 4.36719700  | 1.89001200  | -1.77477000 |
| H | 5.36035900  | 0.80994900  | -2.77005200 |
| C | 1.08162500  | -0.66342500 | -1.18627300 |
| O | 1.04235400  | -1.64203200 | -0.37925400 |
| C | 0.75076400  | -0.55553500 | -2.51020900 |
| H | 0.48761300  | -1.44242100 | -3.07813100 |
| H | -1.56418500 | -0.68740200 | -2.21708000 |
| H | 0.88555800  | 0.38062000  | -3.04040600 |
| C | -2.81858300 | -4.40637400 | 0.79677200  |
| C | -4.19261600 | -3.96616800 | 0.29030600  |
| C | -4.53354900 | -2.51765100 | 0.62487700  |
| C | -1.75906000 | -3.33574200 | 0.54545800  |
| C | -1.86683100 | -2.71160800 | -0.84627200 |
| C | -2.85566700 | -1.57928700 | -0.97549300 |
| H | -2.53400100 | -5.33692700 | 0.29499900  |
| H | -4.96960200 | -4.59427600 | 0.73412900  |
| H | -5.61602800 | -2.39273900 | 0.57985700  |
| H | -1.83695600 | -2.54238800 | 1.29735600  |
| H | -2.12285000 | -3.46704900 | -1.59897400 |

|   |             |             |             |
|---|-------------|-------------|-------------|
| C | -4.78262800 | -0.25845100 | -0.41405300 |
| H | -4.34468400 | 0.48946800  | 0.25888800  |
| C | -4.77783200 | 0.23378400  | -1.85217600 |
| H | -5.36559600 | 1.14867500  | -1.93781000 |
| C | -3.34005100 | 0.50409300  | -2.25054000 |
| H | -2.99014100 | 1.42417700  | -1.76843100 |
| N | -2.50271300 | -0.61623800 | -1.82234100 |
| N | -3.99684900 | -1.50167700 | -0.30815900 |
| H | -0.88703600 | -2.30547800 | -1.11286200 |
| H | -0.75431500 | -3.75125100 | 0.65096800  |
| H | -2.87004800 | -4.62379300 | 1.86834400  |
| H | -4.27572700 | -4.09993100 | -0.79367300 |
| H | -4.22041300 | -2.25578300 | 1.64341000  |
| H | -5.79446300 | -0.47491400 | -0.07408000 |
| H | -5.22334000 | -0.52490200 | -2.50130300 |
| H | -3.22748500 | 0.61703200  | -3.33018200 |

**10**

|   |             |             |             |
|---|-------------|-------------|-------------|
| C | -2.94534100 | 0.53502600  | 0.42926600  |
| C | -4.19702600 | 0.30558400  | -0.13366600 |
| C | -4.96850200 | 1.38231400  | -0.56562800 |
| C | -4.45952000 | 2.67189000  | -0.42734800 |
| C | -3.19677900 | 2.88972900  | 0.13262100  |
| C | -2.42178100 | 1.81787600  | 0.56975300  |
| C | -2.27762300 | -0.76461200 | 0.81499100  |
| C | -3.20906800 | -1.88706700 | 0.22581800  |
| C | -4.51739900 | -1.16680900 | -0.18073400 |
| H | -5.94556900 | 1.21984600  | -1.01042800 |
| H | -5.04835600 | 3.51943900  | -0.76343900 |
| H | -2.81758600 | 3.90213700  | 0.22514100  |
| H | -1.43021400 | 1.97250200  | 0.99606500  |
| H | -3.38837100 | -2.65029500 | 0.98212800  |
| H | -4.83949400 | -1.50551800 | -1.17052800 |
| H | -2.14427700 | -0.86707300 | 1.89425700  |
| H | -5.31941300 | -1.41705200 | 0.52040400  |
| C | -0.75792100 | -1.21327200 | -1.08963300 |
| C | 0.22693200  | -0.38136700 | 0.67877800  |
| N | 0.47630700  | -1.02979100 | -1.45611500 |
| N | -0.94519500 | -0.84336300 | 0.21441800  |
| N | 1.07062100  | -0.49930400 | -0.34243200 |

|   |             |             |             |
|---|-------------|-------------|-------------|
| C | -1.93774000 | -1.79611500 | -1.79806100 |
| H | -2.57981300 | -0.99671000 | -2.19326100 |
| H | -1.61791900 | -2.43458900 | -2.62097400 |
| O | -2.61608300 | -2.60022700 | -0.85133900 |
| C | 2.46386800  | -0.14793900 | -0.34752900 |
| C | 2.81800000  | 1.10908200  | -0.84145900 |
| C | 3.38484400  | -1.08007800 | 0.12949100  |
| C | 4.17531100  | 1.41991300  | -0.86592000 |
| C | 4.73193400  | -0.72059100 | 0.08490100  |
| C | 5.14167100  | 0.51898100  | -0.40913400 |
| H | 4.48685300  | 2.38940000  | -1.24661100 |
| H | 5.47614700  | -1.42610600 | 0.44523400  |
| C | 1.75699100  | 2.07513600  | -1.29034500 |
| H | 1.15822600  | 1.65540900  | -2.10466800 |
| H | 1.08948200  | 2.28134100  | -0.44627700 |
| H | 2.20396200  | 3.00889700  | -1.63463400 |
| C | 6.60032500  | 0.89622600  | -0.42347600 |
| H | 6.84559500  | 1.48680800  | -1.30923600 |
| H | 6.84876100  | 1.50155400  | 0.45414000  |
| H | 7.23827600  | 0.01025900  | -0.40817300 |
| C | 2.92825500  | -2.40447300 | 0.68062000  |
| H | 2.32853800  | -2.25225300 | 1.58502300  |
| H | 2.30662000  | -2.94154000 | -0.04225500 |
| H | 3.78388800  | -3.03092200 | 0.93569000  |
| C | 0.49890100  | 0.31200400  | 2.00286700  |
| O | 0.78644800  | 1.54331100  | 1.86555400  |
| C | 0.35716300  | -0.49236600 | 3.09360100  |
| H | 0.51490300  | -0.09781300 | 4.09069600  |
| H | 0.10174600  | -1.53961100 | 2.97825000  |

## 11

|   |             |             |             |
|---|-------------|-------------|-------------|
| C | -3.02672200 | -0.56165500 | -0.49208800 |
| C | -3.78440700 | -0.35256500 | 0.66557100  |
| C | -4.51265300 | -1.39830200 | 1.21897700  |
| C | -4.47706500 | -2.64478100 | 0.59444700  |
| C | -3.74459400 | -2.84024000 | -0.57776400 |
| C | -3.01669100 | -1.79235500 | -1.13791000 |
| C | -2.36974400 | 0.73025300  | -0.90773900 |
| C | -3.26790700 | 1.77765000  | -0.20309700 |
| C | -3.70789800 | 1.08786300  | 1.10590900  |
| H | -5.10933600 | -1.24412800 | 2.11249600  |
| H | -5.04279700 | -3.47004400 | 1.01474300  |
| H | -3.75101300 | -3.81037900 | -1.06267900 |
| H | -2.46597500 | -1.93877000 | -2.06225700 |



|   |             |             |             |
|---|-------------|-------------|-------------|
| H | -4.14306600 | 1.91189800  | -0.84239800 |
| H | -2.96190100 | 1.20745200  | 1.90077900  |
| H | -2.28761300 | 0.88624400  | -1.98492600 |
| H | -4.65476900 | 1.48290300  | 1.47773000  |
| C | -0.58724300 | 2.00196200  | 0.36826200  |
| C | 0.09066200  | 0.12008900  | -0.47291200 |
| N | 0.67490400  | 1.92168300  | 0.68449500  |
| N | -0.99387000 | 0.89783100  | -0.34306200 |
| N | 1.08005000  | 0.74230600  | 0.15026600  |
| C | -1.53548800 | 3.10720200  | 0.72072400  |
| H | -1.79138500 | 3.03991200  | 1.78494500  |
| H | -1.04833900 | 4.06697100  | 0.54450000  |
| O | -2.67569000 | 3.05129400  | -0.10352800 |
| C | 2.43939300  | 0.27722200  | 0.26765700  |
| C | 2.72253500  | -0.69920800 | 1.22494500  |
| C | 3.39672800  | 0.84537500  | -0.57895100 |
| C | 4.04269800  | -1.14320400 | 1.29359400  |
| C | 4.69820600  | 0.36434500  | -0.46560100 |
| C | 5.03466500  | -0.63249400 | 0.45498900  |
| H | 4.30117000  | -1.90136800 | 2.02785100  |
| H | 5.46825500  | 0.77958500  | -1.11013000 |
| C | 1.66097300  | -1.22112100 | 2.15718100  |
| H | 1.14569700  | -0.39771400 | 2.66080000  |
| H | 0.90702300  | -1.80702600 | 1.62260000  |
| H | 2.10967600  | -1.86093700 | 2.91764200  |
| C | 6.44449100  | -1.15582400 | 0.52790600  |
| H | 6.64749700  | -1.60938300 | 1.49989400  |
| H | 6.60491800  | -1.92062200 | -0.23852600 |
| H | 7.17008500  | -0.35824500 | 0.35437000  |
| C | 3.03467700  | 1.94102500  | -1.54627900 |
| H | 2.18545700  | 1.66349700  | -2.17937400 |
| H | 2.75299400  | 2.85206900  | -1.01018000 |
| H | 3.88050500  | 2.17023200  | -2.19481300 |
| C | 0.25143700  | -1.23616600 | -1.16308800 |
| O | -0.09560100 | -2.21568900 | -0.55557600 |
| C | 0.85979600  | -1.20722900 | -2.52673700 |
| H | 0.88160700  | -2.21674700 | -2.93457400 |
| H | 0.28923600  | -0.53855400 | -3.17879500 |
| H | 1.87970900  | -0.81147300 | -2.45673900 |

**12-ts**

|   |            |            |             |
|---|------------|------------|-------------|
| C | 1.52931800 | 1.59843700 | -0.59034300 |
| C | 2.37623000 | 2.65061800 | -0.92707000 |
| C | 3.32467500 | 2.48064200 | -1.93385000 |

|   |             |             |             |
|---|-------------|-------------|-------------|
| C | 3.39135700  | 1.25641300  | -2.59594200 |
| C | 2.51991800  | 0.21284600  | -2.26696400 |
| C | 1.57762400  | 0.37645200  | -1.25466800 |
| C | 0.61175400  | 1.99250100  | 0.54231400  |
| C | 0.80628700  | 3.54528200  | 0.70064400  |
| C | 2.09497800  | 3.87279500  | -0.09077000 |
| H | 3.99175300  | 3.29242600  | -2.20602000 |
| H | 4.12080200  | 1.11333500  | -3.38628400 |
| H | 2.57292400  | -0.72271700 | -2.81537300 |
| H | 0.88981300  | -0.42891000 | -0.99783500 |
| H | 0.90904300  | 3.79448800  | 1.75660700  |
| H | 1.94597400  | 4.77560700  | -0.69098100 |
| H | 0.85603500  | 1.47831400  | 1.47148900  |
| H | 2.91962600  | 4.07649600  | 0.59948300  |
| C | -1.53986300 | 2.49807000  | -0.55449900 |
| C | -1.50229400 | 0.56703800  | 0.45900100  |
| N | -2.70241100 | 1.96614200  | -0.80254900 |
| N | -0.78299100 | 1.67545700  | 0.23277200  |
| N | -2.65615300 | 0.75684700  | -0.17548400 |
| C | -0.95191800 | 3.82772800  | -0.90160100 |
| H | -0.25087100 | 3.73032100  | -1.74163900 |
| H | -1.73710600 | 4.53321400  | -1.17096200 |
| O | -0.31752900 | 4.29868300  | 0.27222200  |
| C | -3.81346500 | -0.10338800 | -0.17680800 |
| C | -3.96105700 | -1.01024800 | -1.22422100 |
| C | -4.73452800 | 0.04621400  | 0.86234100  |
| C | -5.10534900 | -1.80779100 | -1.20962900 |
| C | -5.85884400 | -0.77436900 | 0.82969000  |
| C | -6.05857500 | -1.70344200 | -0.19553800 |
| H | -5.25191600 | -2.52845700 | -2.00949300 |
| H | -6.59814800 | -0.68388100 | 1.62137600  |
| C | -2.91298600 | -1.12590500 | -2.29612600 |
| H | -2.72943600 | -0.16005500 | -2.77634000 |
| H | -1.97088300 | -1.46667800 | -1.85443200 |
| H | -3.22117100 | -1.83946800 | -3.06115800 |
| C | -7.28759900 | -2.57477400 | -0.19503800 |
| H | -7.31464700 | -3.22241900 | -1.07305500 |
| H | -7.31313200 | -3.20594400 | 0.69786000  |
| H | -8.19512100 | -1.96467100 | -0.18893000 |
| C | -4.50913900 | 1.04637400  | 1.96536100  |
| H | -3.64218400 | 0.77311200  | 2.57678200  |
| H | -4.32658700 | 2.04677200  | 1.56162000  |
| H | -5.37947700 | 1.09318300  | 2.62070300  |
| C | -1.10400700 | -0.71167900 | 1.19363300  |

|   |             |             |             |
|---|-------------|-------------|-------------|
| O | -1.40519600 | -1.74637200 | 0.60689200  |
| C | -0.34829500 | -0.56806100 | 2.40496800  |
| H | -0.44353200 | -1.44500900 | 3.04581300  |
| H | 0.95740400  | -0.62329200 | 2.07383800  |
| H | -0.51026500 | 0.37053700  | 2.93693400  |
| C | 2.89346600  | -4.35996600 | -0.95432100 |
| C | 4.22325500  | -3.96324900 | -0.31057600 |
| C | 4.59239500  | -2.49925000 | -0.53172900 |
| C | 1.82565200  | -3.28764500 | -0.74005000 |
| C | 1.82986300  | -2.74165100 | 0.69080000  |
| C | 2.77227800  | -1.58375200 | 0.96386500  |
| H | 2.55523000  | -5.31047400 | -0.52797800 |
| H | 5.02875900  | -4.57601800 | -0.72511800 |
| H | 5.67255800  | -2.39459600 | -0.41204600 |
| H | 1.98326200  | -2.46203600 | -1.44345200 |
| H | 2.07051000  | -3.54348200 | 1.39995200  |
| C | 4.80035600  | -0.32218900 | 0.64160500  |
| H | 4.48183300  | 0.45967000  | -0.06284600 |
| C | 4.61759600  | 0.14514000  | 2.07597400  |
| H | 5.20665200  | 1.04549200  | 2.26341900  |
| C | 3.13876100  | 0.42453100  | 2.27445700  |
| H | 2.89042000  | 1.35664200  | 1.74852000  |
| N | 2.30870600  | -0.66433400 | 1.77157600  |
| N | 4.00678800  | -1.53636700 | 0.41753800  |
| H | 0.83024100  | -2.39965500 | 0.95830900  |
| H | 0.83390200  | -3.69168800 | -0.96154900 |
| H | 3.03572100  | -4.52451300 | -2.02756400 |
| H | 4.21376500  | -4.15838700 | 0.76709400  |
| H | 4.35818500  | -2.19080200 | -1.56059900 |
| H | 5.84475700  | -0.55893900 | 0.43418800  |
| H | 4.95941900  | -0.63796900 | 2.75964000  |
| H | 2.89302600  | 0.57540400  | 3.33068900  |

**13-ts-r**

|   |            |             |             |
|---|------------|-------------|-------------|
| C | 3.42202300 | -0.98876400 | 1.04454200  |
| C | 4.74326300 | -1.19092600 | 0.65630500  |
| C | 5.66551100 | -1.70485900 | 1.56521500  |
| C | 5.23978800 | -2.01252500 | 2.85562000  |
| C | 3.91173000 | -1.80446300 | 3.23887100  |
| C | 2.98906700 | -1.28629100 | 2.33338500  |
| C | 2.60192000 | -0.42321500 | -0.09088800 |
| C | 3.55334000 | -0.48149200 | -1.34283000 |
| C | 4.96354900 | -0.77447300 | -0.77531400 |
| H | 6.69801900 | -1.86905500 | 1.27146700  |

|   |             |             |             |
|---|-------------|-------------|-------------|
| H | 5.94686200  | -2.41915300 | 3.57164700  |
| H | 3.59941500  | -2.04757300 | 4.24924800  |
| H | 1.95706100  | -1.10452400 | 2.61893100  |
| H | 3.51601500  | 0.47907800  | -1.85687700 |
| H | 5.45624600  | -1.54477100 | -1.37715100 |
| H | 2.27505300  | 0.59710400  | 0.10187100  |
| H | 5.58627400  | 0.12422600  | -0.82848900 |
| C | 1.40918400  | -2.32132000 | -1.11661200 |
| C | 0.11298800  | -1.02696600 | 0.07908400  |
| N | 0.22424600  | -2.83936700 | -1.24925000 |
| N | 1.38807800  | -1.21652400 | -0.31699400 |
| N | -0.57019600 | -2.03262100 | -0.48368600 |
| C | 2.69102700  | -2.65068600 | -1.80432800 |
| H | 3.40825100  | -3.10339300 | -1.10636000 |
| H | 2.51216100  | -3.33617300 | -2.63200400 |
| O | 3.16634000  | -1.42598400 | -2.33118700 |
| C | -1.98556300 | -2.27065000 | -0.45833200 |
| C | -2.52741600 | -2.96368600 | 0.62481200  |
| C | -2.74705000 | -1.77040300 | -1.51708100 |
| C | -3.91112000 | -3.13024000 | 0.64533200  |
| C | -4.12645000 | -1.96225100 | -1.44811200 |
| C | -4.72339200 | -2.62462800 | -0.37233200 |
| H | -4.36553500 | -3.65664200 | 1.48058800  |
| H | -4.75036500 | -1.58060200 | -2.25288100 |
| C | -1.64792400 | -3.44724100 | 1.74546600  |
| H | -1.25348800 | -2.59467100 | 2.31097000  |
| H | -2.21148100 | -4.08010200 | 2.43204500  |
| H | -0.79417700 | -4.01532500 | 1.36525900  |
| C | -6.22161200 | -2.76218800 | -0.30096900 |
| H | -6.51328800 | -3.60689100 | 0.32625200  |
| H | -6.66464600 | -1.85764200 | 0.12891400  |
| H | -6.65326500 | -2.89934100 | -1.29492000 |
| C | -2.09803000 | -1.07055300 | -2.68215800 |
| H | -2.85011100 | -0.54592200 | -3.27475800 |
| H | -1.34023300 | -0.34928600 | -2.35479400 |
| H | -1.59898000 | -1.79765400 | -3.33136700 |
| C | -0.33080400 | 0.03659000  | 1.04705900  |
| O | 0.58150100  | 0.76312900  | 1.50678000  |
| C | -1.69325800 | 0.28115600  | 1.25973300  |
| H | -1.90506900 | 0.90508800  | 2.12053000  |
| H | -2.47309200 | -0.40257500 | 0.95498800  |
| C | 0.28995200  | 2.21484300  | -0.81606700 |
| O | 0.28127100  | 1.17412000  | -1.51446400 |
| C | -0.85787800 | 2.67603500  | -0.10916400 |

|   |             |            |             |
|---|-------------|------------|-------------|
| C | -1.99842700 | 1.87920900 | -0.13091700 |
| H | -0.79915400 | 3.57477400 | 0.49303800  |
| H | -2.04869800 | 1.16873300 | -0.95246000 |
| C | -3.32390900 | 2.31623300 | 0.37116500  |
| C | -4.47406700 | 1.69398000 | -0.12843900 |
| C | -3.47033700 | 3.31789700 | 1.33869700  |
| C | -5.73950600 | 2.07020600 | 0.31195100  |
| H | -4.36626200 | 0.90258100 | -0.86738600 |
| C | -4.73449200 | 3.69563600 | 1.77987000  |
| H | -2.59001100 | 3.79731900 | 1.75666400  |
| C | -5.87371500 | 3.07592700 | 1.26694700  |
| H | -6.61993000 | 1.57885600 | -0.09056400 |
| H | -4.83247600 | 4.47453500 | 2.52948900  |
| H | -6.85828200 | 3.37272200 | 1.61354800  |
| C | 1.56819400  | 3.00193800 | -0.73656900 |
| C | 1.92543000  | 3.73667500 | 0.39829400  |
| C | 2.44384400  | 2.96380700 | -1.82597700 |
| C | 3.13231700  | 4.42985200 | 0.43595800  |
| H | 1.27206200  | 3.73210300 | 1.26485700  |
| C | 3.64776400  | 3.66175600 | -1.79257000 |
| H | 2.16003400  | 2.38180100 | -2.69774400 |
| C | 3.99381500  | 4.39768200 | -0.65970400 |
| H | 3.40624400  | 4.98877800 | 1.32518700  |
| H | 4.31506000  | 3.63340700 | -2.64836700 |
| H | 4.93347600  | 4.94002200 | -0.62858300 |

### 13-ts-s

|   |            |             |            |
|---|------------|-------------|------------|
| C | 3.80239500 | -0.82862100 | 1.24357900 |
| C | 5.05661400 | -0.22471700 | 1.28581200 |
| C | 6.18891300 | -0.99141200 | 1.54736400 |
| C | 6.03890200 | -2.36069600 | 1.76108400 |
| C | 4.77574300 | -2.95756300 | 1.72216000 |
| C | 3.64034500 | -2.19209300 | 1.46457500 |
| C | 2.72838300 | 0.18863100  | 0.93367000 |
| C | 3.51775200 | 1.47352100  | 0.50079300 |
| C | 4.94956300 | 1.26024400  | 1.04022600 |
| H | 7.17281400 | -0.53291000 | 1.57833600 |
| H | 6.91395000 | -2.97130100 | 1.96015200 |
| H | 4.67994300 | -4.02474200 | 1.89399900 |
| H | 2.64617800 | -2.62980000 | 1.44333800 |
| H | 3.03439300 | 2.35564700  | 0.92198800 |
| H | 5.68405200 | 1.64307500  | 0.32606100 |
| H | 2.07501800 | 0.39408700  | 1.77873000 |
| H | 5.08351000 | 1.81371700  | 1.97565800 |

|   |             |             |             |
|---|-------------|-------------|-------------|
| C | 2.25712400  | -0.15890600 | -1.45706900 |
| C | 0.61569600  | -0.76321300 | -0.14864200 |
| N | 1.33038400  | -0.57621200 | -2.27072700 |
| N | 1.86518500  | -0.26873700 | -0.15673000 |
| N | 0.31890700  | -0.96795600 | -1.43574100 |
| C | 3.54514500  | 0.54853100  | -1.71790400 |
| H | 4.40355600  | -0.09371800 | -1.48394800 |
| H | 3.60168800  | 0.86563100  | -2.75856100 |
| O | 3.51312300  | 1.70955700  | -0.90521900 |
| C | -0.83821500 | -1.60591100 | -2.00501300 |
| C | -1.84251000 | -0.80082000 | -2.54826200 |
| C | -0.88221900 | -2.99991700 | -2.00378300 |
| C | -2.93615600 | -1.45044200 | -3.11557100 |
| C | -1.99998100 | -3.60135400 | -2.58238100 |
| C | -3.02847400 | -2.84513200 | -3.14393500 |
| H | -3.73761300 | -0.85298500 | -3.54337000 |
| H | -2.06369000 | -4.68613600 | -2.59553300 |
| C | -1.76827100 | 0.69742200  | -2.44706800 |
| H | -1.93043100 | 1.00994600  | -1.40651000 |
| H | -0.78816900 | 1.07791800  | -2.74867700 |
| H | -2.53404700 | 1.16638300  | -3.06638400 |
| C | -4.21731100 | -3.50978600 | -3.78992700 |
| H | -5.15244800 | -3.12654100 | -3.36680900 |
| H | -4.23290300 | -3.30108400 | -4.86598100 |
| H | -4.18737600 | -4.59416400 | -3.65047800 |
| C | 0.21714000  | -3.80929200 | -1.36910400 |
| H | 1.20303600  | -3.48857500 | -1.71920500 |
| H | 0.19842700  | -3.69613500 | -0.27898500 |
| H | 0.09699800  | -4.86827500 | -1.60101300 |
| C | -0.15859700 | -1.12883200 | 1.09679900  |
| O | 0.55243200  | -1.37078300 | 2.09852200  |
| C | -1.55937100 | -1.12549500 | 1.04048000  |
| H | -2.05617900 | -1.69464100 | 1.81664600  |
| H | -2.08561000 | -1.01411900 | 0.10159700  |
| C | -0.77284500 | 2.21953900  | 0.72020200  |
| O | 0.25465400  | 1.59811500  | 1.06933700  |
| C | -2.05879800 | 1.81359100  | 1.17242100  |
| C | -2.13061100 | 0.72577100  | 2.04011600  |
| H | -2.95443200 | 2.24258700  | 0.73846000  |
| H | -1.25779000 | 0.54204700  | 2.66646400  |
| C | -3.42783800 | 0.27586600  | 2.59870000  |
| C | -3.47266700 | -0.28226000 | 3.88155500  |
| C | -4.61954400 | 0.38408700  | 1.87125300  |
| C | -4.67973500 | -0.69760600 | 4.43573300  |

|   |             |             |             |
|---|-------------|-------------|-------------|
| H | -2.54941100 | -0.38698200 | 4.44579900  |
| C | -5.82604600 | -0.03482200 | 2.42201500  |
| H | -4.59709800 | 0.78174200  | 0.86059300  |
| C | -5.86145900 | -0.57267300 | 3.70789300  |
| H | -4.69802300 | -1.11882100 | 5.43574600  |
| H | -6.74122300 | 0.05221500  | 1.84486400  |
| H | -6.80331000 | -0.90005800 | 4.13626800  |
| C | -0.64126500 | 3.32889400  | -0.28216000 |
| C | -1.61163000 | 4.32262000  | -0.44432000 |
| C | 0.50095000  | 3.35093000  | -1.08921600 |
| C | -1.44318400 | 5.31832700  | -1.40341100 |
| H | -2.49106500 | 4.33209900  | 0.19248400  |
| C | 0.66389500  | 4.33889700  | -2.05453400 |
| H | 1.25624100  | 2.58321200  | -0.94748200 |
| C | -0.30899600 | 5.32548100  | -2.21407300 |
| H | -2.19704300 | 6.09075500  | -1.51739600 |
| H | 1.55040600  | 4.34123000  | -2.68130300 |
| H | -0.18237300 | 6.09919700  | -2.96462700 |

**14-r**

|   |             |             |             |
|---|-------------|-------------|-------------|
| C | -3.59449200 | -1.00767600 | -0.97526600 |
| C | -4.92837300 | -0.88686700 | -0.59342500 |
| C | -5.88527900 | -1.73667600 | -1.14189600 |
| C | -5.47871900 | -2.69940600 | -2.06493800 |
| C | -4.13774000 | -2.80916200 | -2.44295400 |
| C | -3.17631800 | -1.95670800 | -1.90226300 |
| C | -2.74006400 | 0.01536900  | -0.26050300 |
| C | -3.67276100 | 0.57907000  | 0.86869100  |
| C | -5.10448000 | 0.22951500  | 0.40653500  |
| H | -6.92816100 | -1.65789200 | -0.84966300 |
| H | -6.21295800 | -3.37443300 | -2.49330600 |
| H | -3.84423900 | -3.56442000 | -3.16515300 |
| H | -2.12780800 | -1.99699300 | -2.19040700 |
| H | -3.52225900 | 1.65452200  | 0.98401500  |
| H | -5.72224600 | -0.04377800 | 1.26676600  |
| H | -2.39708900 | 0.80565900  | -0.92566400 |
| H | -5.56739600 | 1.10265700  | -0.06593300 |
| C | -1.70133800 | -1.40289900 | 1.44016800  |
| C | -0.26903900 | -0.69684500 | -0.06601300 |
| N | -0.59150200 | -2.00171500 | 1.74442100  |
| N | -1.55251400 | -0.60756600 | 0.33751000  |
| N | 0.28884100  | -1.56249100 | 0.78661000  |
| C | -3.01142600 | -1.33081900 | 2.15726500  |
| H | -3.76519500 | -1.96439900 | 1.67258300  |

|   |             |             |             |
|---|-------------|-------------|-------------|
| H | -2.89098100 | -1.64521600 | 3.19381000  |
| O | -3.37869900 | 0.03761000  | 2.15238300  |
| C | 1.63756300  | -2.05974700 | 0.83598200  |
| C | 2.04844900  | -2.98519200 | -0.12549600 |
| C | 2.45443200  | -1.62455000 | 1.88513100  |
| C | 3.36858500  | -3.43187900 | -0.05066300 |
| C | 3.76056200  | -2.10715300 | 1.91833900  |
| C | 4.23740800  | -2.99662300 | 0.95118400  |
| H | 3.72270400  | -4.14405800 | -0.79134100 |
| H | 4.42338700  | -1.77405600 | 2.71299700  |
| C | 1.10368000  | -3.48055400 | -1.18811400 |
| H | 0.20067500  | -3.89987300 | -0.73103300 |
| H | 0.78149300  | -2.66937000 | -1.85173600 |
| H | 1.58093300  | -4.26096500 | -1.78269000 |
| C | 5.67054900  | -3.45907800 | 0.98289400  |
| H | 5.79499200  | -4.40106800 | 0.44517800  |
| H | 6.32099100  | -2.71576600 | 0.51004000  |
| H | 6.01881700  | -3.59422900 | 2.00949200  |
| C | 1.94538200  | -0.66084000 | 2.92485500  |
| H | 1.37573600  | 0.15645600  | 2.46769500  |
| H | 1.27744700  | -1.16605800 | 3.62848100  |
| H | 2.77762700  | -0.23115200 | 3.48448200  |
| C | 0.24878000  | -0.05688000 | -1.41492800 |
| O | -0.25867000 | -0.71280500 | -2.39501200 |
| C | 1.76362200  | 0.19849000  | -1.46013100 |
| H | 1.89642900  | 0.73603200  | -2.40511100 |
| H | 2.30376200  | -0.74877700 | -1.54726100 |
| C | 0.06657000  | 2.09770800  | -0.28485900 |
| O | -0.36041400 | 1.32589500  | -1.32705400 |
| C | 1.30868800  | 2.01410200  | 0.21440300  |
| C | 2.33031200  | 1.03576000  | -0.29715400 |
| H | 1.59112500  | 2.66571900  | 1.03589500  |
| H | 2.57577800  | 0.35505100  | 0.52511200  |
| C | 3.64543800  | 1.67743900  | -0.70217400 |
| C | 4.84268200  | 0.98975200  | -0.48766000 |
| C | 3.68577100  | 2.91915200  | -1.34014700 |
| C | 6.05778100  | 1.53053000  | -0.90096300 |
| H | 4.81475500  | 0.02140400  | 0.01032900  |
| C | 4.89928700  | 3.46398900  | -1.75297400 |
| H | 2.75654400  | 3.45809000  | -1.50837800 |
| C | 6.08889800  | 2.77105600  | -1.53508400 |
| H | 6.98027200  | 0.98585800  | -0.72448000 |
| H | 4.91715200  | 4.43154600  | -2.24534600 |
| H | 7.03442800  | 3.19639800  | -1.85617500 |



|   |             |            |             |
|---|-------------|------------|-------------|
| C | -1.00241200 | 2.97454500 | 0.25468600  |
| C | -1.08068200 | 3.25779000 | 1.62269300  |
| C | -1.99127800 | 3.47636700 | -0.60104400 |
| C | -2.11567000 | 4.04355800 | 2.12227700  |
| H | -0.34361300 | 2.83668700 | 2.29979400  |
| C | -3.02606200 | 4.26042600 | -0.10014700 |
| H | -1.94212400 | 3.24291000 | -1.66015700 |
| C | -3.09115900 | 4.54704300 | 1.26331600  |
| H | -2.16962400 | 4.24839100 | 3.18662700  |
| H | -3.78375400 | 4.64658000 | -0.77440800 |
| H | -3.90199600 | 5.15267800 | 1.65488500  |

**14-s**

|   |             |             |             |
|---|-------------|-------------|-------------|
| C | 3.61371300  | -0.79019200 | 1.07840000  |
| C | 4.98914900  | -0.81724200 | 0.85989400  |
| C | 5.82934000  | -1.41702200 | 1.79435200  |
| C | 5.26711100  | -1.98660500 | 2.93553800  |
| C | 3.88593100  | -1.95231900 | 3.14646400  |
| C | 3.04101100  | -1.34736100 | 2.21771200  |
| C | 2.90122500  | -0.10389900 | -0.06861500 |
| C | 4.00288200  | 0.02588200  | -1.18221400 |
| C | 5.34607300  | -0.13947700 | -0.43895500 |
| H | 6.90263800  | -1.44844700 | 1.63284400  |
| H | 5.91015400  | -2.46374500 | 3.66849100  |
| H | 3.46922100  | -2.39862400 | 4.04371700  |
| H | 1.96511300  | -1.28030200 | 2.35976400  |
| H | 3.92594600  | 0.99262700  | -1.68101200 |
| H | 6.04656200  | -0.71218400 | -1.05370000 |
| H | 2.48371900  | 0.86517900  | 0.20736700  |
| H | 5.79811300  | 0.84066200  | -0.25488600 |
| C | 2.04310900  | -2.04693400 | -1.30716800 |
| C | 0.47156700  | -0.88307000 | -0.32534900 |
| N | 0.95336100  | -2.71718300 | -1.53379900 |
| N | 1.79305800  | -0.92578700 | -0.56641300 |
| N | -0.01736000 | -1.97887900 | -0.90333700 |
| C | 3.43593800  | -2.21607200 | -1.82132500 |
| H | 4.09354500  | -2.63869400 | -1.05079500 |
| H | 3.44172600  | -2.86632700 | -2.69543100 |
| O | 3.85374000  | -0.92517600 | -2.23110500 |
| C | -1.35837400 | -2.49341600 | -0.84484300 |
| C | -2.18830700 | -2.32437100 | -1.95237000 |
| C | -1.75349600 | -3.13723600 | 0.32970100  |
| C | -3.48489600 | -2.82649800 | -1.85462500 |
| C | -3.05972800 | -3.61996400 | 0.37821300  |

|   |             |             |             |
|---|-------------|-------------|-------------|
| C | -3.93419500 | -3.47453100 | -0.70177100 |
| H | -4.16155900 | -2.70319000 | -2.69631700 |
| H | -3.40335700 | -4.11674600 | 1.28190300  |
| C | -1.69680100 | -1.61015600 | -3.18242300 |
| H | -1.35960000 | -0.59676600 | -2.93913900 |
| H | -0.84671300 | -2.13597800 | -3.62689900 |
| H | -2.48934300 | -1.53821600 | -3.92813400 |
| C | -5.33285500 | -4.02988800 | -0.63389800 |
| H | -6.02084700 | -3.43977500 | -1.24310300 |
| H | -5.35499200 | -5.05772700 | -1.01008600 |
| H | -5.70180000 | -4.04549000 | 0.39380000  |
| C | -0.81192300 | -3.24875000 | 1.49983300  |
| H | 0.13150300  | -3.71751000 | 1.20017000  |
| H | -0.56945000 | -2.25585700 | 1.90085100  |
| H | -1.25803100 | -3.84806400 | 2.29466200  |
| C | -0.18390200 | 0.19154400  | 0.58765300  |
| O | 0.29127300  | 0.09191700  | 1.78021600  |
| C | -1.71498300 | 0.27176200  | 0.46562600  |
| H | -2.17588800 | -0.62221100 | 0.89293600  |
| H | -2.02833900 | 0.35753100  | -0.58296400 |
| C | -0.22873400 | 2.59815300  | 0.14554100  |
| O | 0.33090700  | 1.40293000  | -0.18038400 |
| C | -1.39552200 | 2.70990900  | 0.79885000  |
| C | -2.17574600 | 1.50742400  | 1.25370700  |
| H | -1.79578900 | 3.69599600  | 1.00753700  |
| H | -1.94381400 | 1.30704400  | 2.30884400  |
| C | -3.67493300 | 1.68528900  | 1.12506100  |
| C | -4.53258600 | 1.17083000  | 2.10033500  |
| C | -4.23246900 | 2.31810900  | 0.00999800  |
| C | -5.91468700 | 1.28619700  | 1.96902400  |
| H | -4.10929600 | 0.67774400  | 2.97224700  |
| C | -5.61322900 | 2.43690900  | -0.12519700 |
| H | -3.57168900 | 2.72177500  | -0.75340200 |
| C | -6.45943100 | 1.92134100  | 0.85521300  |
| H | -6.56642100 | 0.88428500  | 2.73867000  |
| H | -6.03004800 | 2.93314900  | -0.99633100 |
| H | -7.53579800 | 2.01616500  | 0.75223000  |
| C | 0.58451600  | 3.74556800  | -0.33168600 |
| C | 0.44656500  | 5.02569600  | 0.21982000  |
| C | 1.52116500  | 3.55218300  | -1.35454500 |
| C | 1.21221300  | 6.08576900  | -0.25237400 |
| H | -0.24684700 | 5.19015000  | 1.03822800  |
| C | 2.28855600  | 4.61429700  | -1.82488700 |
| H | 1.63441400  | 2.56195400  | -1.78309800 |

|   |            |            |             |
|---|------------|------------|-------------|
| C | 2.13607600 | 5.88587300 | -1.27763900 |
| H | 1.09568800 | 7.06986300 | 0.19049600  |
| H | 3.00771200 | 4.44704400 | -2.62069200 |
| H | 2.73673600 | 6.71386300 | -1.64005900 |

**15-ts-r**

|   |             |             |             |
|---|-------------|-------------|-------------|
| C | 2.97652900  | -0.99986400 | 0.96541300  |
| C | 4.28503400  | -1.46014700 | 1.08579100  |
| C | 4.94745900  | -1.36080500 | 2.30697800  |
| C | 4.27645300  | -0.80071500 | 3.39250700  |
| C | 2.96109500  | -0.34580200 | 3.26337600  |
| C | 2.29345700  | -0.44267200 | 2.04357900  |
| C | 2.45849400  | -1.19734400 | -0.44235600 |
| C | 3.53991400  | -2.10457100 | -1.13330900 |
| C | 4.78730700  | -2.01817200 | -0.22196000 |
| H | 5.96613600  | -1.72141400 | 2.41451600  |
| H | 4.77910400  | -0.72073400 | 4.35129700  |
| H | 2.45557900  | 0.08432100  | 4.12206800  |
| H | 1.26970100  | -0.08945400 | 1.92931800  |
| H | 3.75060700  | -1.73572900 | -2.13757500 |
| H | 5.24872200  | -3.00544300 | -0.12337300 |
| H | 2.35281500  | -0.24466600 | -0.96475800 |
| H | 5.53437500  | -1.35252000 | -0.66676300 |
| C | 1.04852400  | -3.19994900 | -0.27933200 |
| C | -0.08906400 | -1.29600400 | -0.50199200 |
| N | -0.19479900 | -3.57075200 | -0.23737200 |
| N | 1.15157100  | -1.84384000 | -0.44776600 |
| N | -0.87100600 | -2.37627700 | -0.36518400 |
| C | 2.31729100  | -3.98740600 | -0.29413400 |
| H | 2.82720700  | -3.92764500 | 0.67716200  |
| H | 2.12120000  | -5.03319300 | -0.52944900 |
| O | 3.11129100  | -3.44575100 | -1.33719700 |
| C | -2.30469700 | -2.36224000 | -0.36004000 |
| C | -2.96677800 | -2.32733200 | 0.86972900  |
| C | -2.97459600 | -2.36285000 | -1.58527000 |
| C | -4.35956700 | -2.26727300 | 0.84635800  |
| C | -4.36763500 | -2.29842800 | -1.55807300 |
| C | -5.07303300 | -2.24753000 | -0.35443200 |
| H | -4.90055700 | -2.23105800 | 1.78895200  |
| H | -4.91343100 | -2.28895700 | -2.49834800 |
| C | -2.18931700 | -2.34117500 | 2.15810100  |
| H | -1.54520500 | -3.22380500 | 2.21395000  |
| H | -1.55175400 | -1.45349100 | 2.21578300  |
| H | -2.86530400 | -2.34973700 | 3.01480800  |

|   |             |             |             |
|---|-------------|-------------|-------------|
| C | -6.57949400 | -2.20507400 | -0.34698000 |
| H | -6.95208300 | -1.60135000 | 0.48392600  |
| H | -6.96825100 | -1.79090900 | -1.27968300 |
| H | -6.99297000 | -3.21231700 | -0.23272500 |
| C | -2.21069800 | -2.43040000 | -2.88094900 |
| H | -1.55915800 | -1.55945900 | -3.00348800 |
| H | -1.56912000 | -3.31643300 | -2.90705300 |
| H | -2.89451500 | -2.47136100 | -3.72997500 |
| C | -0.64974700 | 0.64399200  | 0.06011000  |
| O | -0.88032600 | 0.54152500  | 1.25875200  |
| C | -1.71729400 | 0.95335800  | -0.96747700 |
| H | -2.64890900 | 0.47427300  | -0.65705500 |
| H | -1.41104800 | 0.56377600  | -1.94076900 |
| C | 0.61705500  | 2.42121900  | -0.92906500 |
| O | 0.61583000  | 1.20154600  | -0.29936200 |
| C | -0.50051500 | 3.07928600  | -1.26692300 |
| C | -1.86911100 | 2.48721800  | -1.06999200 |
| H | -0.41189100 | 4.07389600  | -1.68853500 |
| H | -2.46434800 | 2.68613800  | -1.96964100 |
| C | -2.63778800 | 3.07459200  | 0.10590500  |
| C | -4.03502600 | 3.09278000  | 0.06515800  |
| C | -1.99455000 | 3.56732900  | 1.24276500  |
| C | -4.77535800 | 3.58932300  | 1.13417600  |
| H | -4.54581700 | 2.71315300  | -0.81719200 |
| C | -2.73165000 | 4.06696000  | 2.31423000  |
| H | -0.90938100 | 3.55677000  | 1.28580000  |
| C | -4.12364100 | 4.08030600  | 2.26401200  |
| H | -5.85970100 | 3.59829300  | 1.08298000  |
| H | -2.21645000 | 4.44790000  | 3.19077900  |
| H | -4.69680900 | 4.47247600  | 3.09818800  |
| C | 1.99770400  | 2.91046800  | -1.15138900 |
| C | 2.28450200  | 3.81337300  | -2.18206000 |
| C | 3.04015400  | 2.46191700  | -0.33115200 |
| C | 3.58281700  | 4.27191600  | -2.37542300 |
| H | 1.49213800  | 4.13919300  | -2.84852200 |
| C | 4.34025600  | 2.91725200  | -0.53240700 |
| H | 2.82403700  | 1.76118700  | 0.46944500  |
| C | 4.61577100  | 3.82528900  | -1.55213900 |
| H | 3.79127400  | 4.96914200  | -3.18052400 |
| H | 5.13809200  | 2.56240600  | 0.11266300  |
| H | 5.62944100  | 4.17932500  | -1.70949700 |

**15-ts-s**

|   |             |             |             |
|---|-------------|-------------|-------------|
| C | -3.38855800 | -0.78250700 | -0.35536000 |
|---|-------------|-------------|-------------|

|   |             |             |             |
|---|-------------|-------------|-------------|
| C | -4.72391600 | -0.93783900 | 0.00623400  |
| C | -5.69283800 | -1.13127700 | -0.97552100 |
| C | -5.29729700 | -1.17380600 | -2.31121800 |
| C | -3.95285100 | -1.02709800 | -2.66441300 |
| C | -2.97952200 | -0.83062500 | -1.68562800 |
| C | -2.52038600 | -0.56886400 | 0.86469800  |
| C | -3.45747300 | -0.91647600 | 2.07541300  |
| C | -4.89297900 | -0.86036900 | 1.50328400  |
| H | -6.73721000 | -1.25662600 | -0.70546700 |
| H | -6.04127700 | -1.32824300 | -3.08626000 |
| H | -3.66520800 | -1.06789200 | -3.71009900 |
| H | -1.92957300 | -0.70740500 | -1.94797500 |
| H | -3.31756700 | -0.19200000 | 2.87823600  |
| H | -5.49415000 | -1.67680000 | 1.91457100  |
| H | -2.16781400 | 0.46288800  | 0.92515900  |
| H | -5.37710800 | 0.07854800  | 1.79224500  |
| C | -1.45335500 | -2.75078400 | 1.19984400  |
| C | -0.08822800 | -1.17168500 | 0.41253500  |
| N | -0.32240200 | -3.36743300 | 1.03642300  |
| N | -1.34742300 | -1.43142900 | 0.84683500  |
| N | 0.49444700  | -2.37299200 | 0.54093800  |
| C | -2.75277100 | -3.19440600 | 1.78795000  |
| H | -3.49991700 | -3.36914200 | 1.00179500  |
| H | -2.62451700 | -4.10968500 | 2.36562900  |
| O | -3.16179300 | -2.17013700 | 2.68057200  |
| C | 1.85927700  | -2.66168500 | 0.21271500  |
| C | 2.14334600  | -3.20758900 | -1.03970600 |
| C | 2.84849800  | -2.36697100 | 1.15586000  |
| C | 3.48434300  | -3.43824900 | -1.35114300 |
| C | 4.17265700  | -2.61025500 | 0.79849400  |
| C | 4.50770000  | -3.13764300 | -0.45179700 |
| H | 3.73262600  | -3.86116600 | -2.32151100 |
| H | 4.96143200  | -2.38819100 | 1.51341400  |
| C | 1.03446200  | -3.52364900 | -2.00630800 |
| H | 0.32747800  | -4.23537800 | -1.56969900 |
| H | 0.48498300  | -2.60975800 | -2.25232500 |
| H | 1.43661500  | -3.95345700 | -2.92539900 |
| C | 5.95180800  | -3.36697400 | -0.81718100 |
| H | 6.03950700  | -3.96771800 | -1.72465600 |
| H | 6.46170500  | -2.41450400 | -0.99253700 |
| H | 6.48426400  | -3.87798500 | -0.01075600 |
| C | 2.48157000  | -1.80938200 | 2.50529700  |
| H | 2.04652100  | -0.80910900 | 2.41467600  |
| H | 1.73527600  | -2.44049500 | 2.99719200  |

|   |             |             |             |
|---|-------------|-------------|-------------|
| H | 3.36136600  | -1.74467400 | 3.14723300  |
| C | 0.51354200  | 0.30016500  | -1.00219900 |
| O | 0.44603500  | -0.28926500 | -2.07088400 |
| C | 1.81575600  | 0.76050200  | -0.38416000 |
| H | 2.59832500  | 0.03944700  | -0.63227800 |
| H | 1.71031400  | 0.82883100  | 0.70147500  |
| C | -0.30282300 | 2.50510000  | -0.54825200 |
| O | -0.57218200 | 1.16379200  | -0.67770900 |
| C | 0.92096500  | 3.02824800  | -0.70397100 |
| C | 2.13219000  | 2.16413800  | -0.93886500 |
| H | 1.03882900  | 4.10525400  | -0.66217300 |
| H | 2.31755600  | 2.07186500  | -2.01845500 |
| C | 3.39312500  | 2.70681000  | -0.29736300 |
| C | 4.62677300  | 2.54488300  | -0.93197400 |
| C | 3.35668300  | 3.32351100  | 0.95618700  |
| C | 5.80030800  | 2.99322000  | -0.33103600 |
| H | 4.66541700  | 2.06485900  | -1.90682900 |
| C | 4.52808500  | 3.77461000  | 1.55933300  |
| H | 2.40040200  | 3.45203000  | 1.45777000  |
| C | 5.75396600  | 3.61141500  | 0.91661600  |
| H | 6.75090400  | 2.86345900  | -0.83886500 |
| H | 4.48281800  | 4.25548900  | 2.53158800  |
| H | 6.66704600  | 3.96548600  | 1.38437800  |
| C | -1.53466400 | 3.27537800  | -0.26125000 |
| C | -1.47859700 | 4.50877000  | 0.39890800  |
| C | -2.78143800 | 2.76317400  | -0.63947800 |
| C | -2.64426300 | 5.22194000  | 0.65634200  |
| H | -0.52188800 | 4.89835100  | 0.73312200  |
| C | -3.94716300 | 3.47536200  | -0.37188200 |
| H | -2.83032800 | 1.80661200  | -1.14979100 |
| C | -3.88281900 | 4.70797200  | 0.27347100  |
| H | -2.58683700 | 6.17491500  | 1.17245900  |
| H | -4.90625800 | 3.06499600  | -0.67265500 |
| H | -4.79124300 | 5.26266700  | 0.48473600  |

**16-ts-r**

|   |             |             |             |
|---|-------------|-------------|-------------|
| C | -0.73191000 | 0.38324500  | 0.88426900  |
| O | -0.16891800 | 1.49774900  | 0.90739400  |
| C | -0.23704500 | -0.76914600 | 1.49245000  |
| H | 0.50837000  | -0.60959300 | 2.26243500  |
| H | -0.78751000 | -1.69847600 | 1.53658300  |
| C | 2.59025200  | 1.09355200  | 0.38081800  |
| C | 1.91981100  | 0.09597000  | -0.36580900 |
| C | 1.44899900  | -1.14786700 | 0.04397300  |

|   |             |             |             |
|---|-------------|-------------|-------------|
| H | 1.59611500  | 0.44157100  | -1.34161600 |
| H | 1.88156900  | -1.64469200 | 0.90251200  |
| C | 0.81864200  | -2.05334900 | -0.94378900 |
| C | 0.96068700  | -3.43786700 | -0.78876000 |
| C | 0.08938200  | -1.57248600 | -2.04186000 |
| C | 0.42027200  | -4.31832800 | -1.72322400 |
| H | 1.51388300  | -3.82179400 | 0.06473600  |
| C | -0.45478100 | -2.45043800 | -2.97289300 |
| H | -0.06524900 | -0.50303100 | -2.16548600 |
| C | -0.27945500 | -3.82709800 | -2.82337900 |
| H | 0.55114500  | -5.38784600 | -1.59401800 |
| H | -1.02710200 | -2.06221100 | -3.80900700 |
| H | -0.70034000 | -4.51214900 | -3.55241700 |
| C | 2.61791200  | 2.44430600  | -0.26867700 |
| C | 3.10976000  | 2.59130200  | -1.56825600 |
| C | 2.15740200  | 3.56508800  | 0.42496000  |
| C | 3.14152200  | 3.84843900  | -2.16813200 |
| H | 3.47790800  | 1.72085100  | -2.10498800 |
| C | 2.17053100  | 4.81520700  | -0.18355500 |
| H | 1.76386400  | 3.43551700  | 1.42728000  |
| C | 2.66473700  | 4.96171700  | -1.48018500 |
| H | 3.53782000  | 3.95621500  | -3.17282600 |
| H | 1.78910800  | 5.67918400  | 0.35271300  |
| H | 2.67948600  | 5.94034900  | -1.94982800 |
| N | 3.23610300  | 1.08470000  | 1.54263700  |
| S | 3.71546800  | -0.24262600 | 2.35213300  |
| O | 2.62224200  | -1.04184300 | 2.93548800  |
| O | 4.72496700  | 0.22249500  | 3.30859400  |
| C | 4.53725800  | -1.27851700 | 1.15086200  |
| C | 4.35511100  | -2.65640200 | 1.20817800  |
| C | 5.37445000  | -0.70436800 | 0.19776700  |
| C | 5.01600300  | -3.46677900 | 0.29069000  |
| H | 3.68706900  | -3.08017700 | 1.95184300  |
| C | 6.02649700  | -1.52771400 | -0.71262400 |
| H | 5.49696100  | 0.37406100  | 0.15528800  |
| C | 5.85949100  | -2.91649800 | -0.67912300 |
| H | 4.86914900  | -4.54268200 | 0.32355700  |
| H | 6.67235500  | -1.08614900 | -1.46605600 |
| C | 6.58864800  | -3.80275400 | -1.65396300 |
| H | 7.52079000  | -4.17092200 | -1.21325500 |
| H | 5.98587300  | -4.67303700 | -1.92307400 |
| H | 6.84464300  | -3.25997300 | -2.56616900 |
| C | -3.62947400 | -2.33596900 | 1.05446200  |
| C | -4.63362900 | -3.25985400 | 0.77482100  |

|   |             |             |             |
|---|-------------|-------------|-------------|
| C | -5.60413400 | -3.54594000 | 1.73257700  |
| C | -5.55808400 | -2.88867100 | 2.95903500  |
| C | -4.55622900 | -1.95262600 | 3.22948900  |
| C | -3.58312000 | -1.66755300 | 2.27661300  |
| C | -2.70352400 | -2.15826300 | -0.13103300 |
| C | -3.34256000 | -3.04126600 | -1.27359000 |
| C | -4.50133200 | -3.82594800 | -0.61304400 |
| H | -6.39053500 | -4.26394800 | 1.52092900  |
| H | -6.31235900 | -3.09817100 | 3.71057200  |
| H | -4.53710200 | -1.44240500 | 4.18658000  |
| H | -2.80813000 | -0.93547300 | 2.48581200  |
| H | -2.57767600 | -3.71474200 | -1.65511200 |
| H | -5.41796700 | -3.71887300 | -1.20246200 |
| H | -1.67927400 | -2.48694500 | 0.04427900  |
| H | -4.26537800 | -4.89353200 | -0.58575000 |
| C | -3.60206600 | -0.21574100 | -1.35538200 |
| C | -1.92742100 | 0.30464300  | -0.04387700 |
| N | -3.50926400 | 1.07827300  | -1.43186200 |
| N | -2.65434200 | -0.73511600 | -0.51800100 |
| N | -2.47443100 | 1.39054900  | -0.60448700 |
| C | -4.51550400 | -1.15303400 | -2.07245800 |
| H | -5.37868000 | -1.40577200 | -1.44128400 |
| H | -4.87324900 | -0.69567100 | -2.99460100 |
| O | -3.75036900 | -2.29292700 | -2.40372400 |
| C | -2.23894700 | 2.79495500  | -0.34815900 |
| C | -3.01868000 | 3.40089300  | 0.63365600  |
| C | -1.30818200 | 3.47987500  | -1.12806100 |
| C | -2.84593000 | 4.77358200  | 0.82450000  |
| C | -1.17513200 | 4.84580600  | -0.90175900 |
| C | -1.93621600 | 5.50863000  | 0.06590700  |
| H | -3.43705500 | 5.27450700  | 1.58678500  |
| H | -0.44359200 | 5.40213500  | -1.48296600 |
| C | -3.97720000 | 2.60039800  | 1.47544600  |
| H | -4.64812100 | 1.99558900  | 0.85794200  |
| H | -3.43334500 | 1.91838500  | 2.13884100  |
| H | -4.58422000 | 3.25953300  | 2.09734300  |
| C | -1.76529200 | 6.99054400  | 0.27822400  |
| H | -2.34464100 | 7.33747000  | 1.13602600  |
| H | -0.71410800 | 7.24024200  | 0.44932000  |
| H | -2.09275300 | 7.55001100  | -0.60322300 |
| C | -0.44911600 | 2.74328000  | -2.11299200 |
| H | 0.12516800  | 1.98630600  | -1.56863000 |
| H | -1.04962600 | 2.24201500  | -2.87959200 |
| H | 0.25500400  | 3.42198500  | -2.59782600 |



**16-ts-s**

|   |             |             |             |
|---|-------------|-------------|-------------|
| C | -3.75948800 | -1.38411300 | 1.86060300  |
| C | -5.08715100 | -1.10171700 | 2.20298400  |
| C | -5.45452200 | -0.93689200 | 3.53332100  |
| C | -4.48005800 | -1.05761600 | 4.52199000  |
| C | -3.16009900 | -1.35551700 | 4.18302500  |
| C | -2.78896500 | -1.52623000 | 2.85042000  |
| C | -3.63273000 | -1.51145200 | 0.35399400  |
| C | -5.10805700 | -1.74803400 | -0.07518800 |
| C | -5.96771900 | -1.03235800 | 0.98475400  |
| H | -6.48606800 | -0.72337700 | 3.79550800  |
| H | -4.75191500 | -0.93106800 | 5.56491100  |
| H | -2.41393600 | -1.46594600 | 4.96249400  |
| H | -1.76268700 | -1.77354800 | 2.60754200  |
| H | -5.27441000 | -2.82521600 | -0.00373200 |
| H | -6.16613500 | 0.01182600  | 0.71673200  |
| H | -2.97706000 | -2.30496300 | -0.01072800 |
| H | -6.93395500 | -1.52247500 | 1.11854300  |
| C | -3.94054000 | 0.47849700  | -1.15955400 |
| C | -2.08729900 | 0.51118900  | -0.01132000 |
| N | -3.39162600 | 1.62865300  | -1.43160000 |
| N | -3.18222100 | -0.23398900 | -0.26904500 |
| N | -2.24416900 | 1.63935700  | -0.70360700 |
| C | -5.22338100 | -0.05097900 | -1.72410400 |
| H | -6.06430000 | 0.54920000  | -1.35717300 |
| H | -5.19167400 | 0.03868400  | -2.81192700 |
| O | -5.36884800 | -1.41741500 | -1.41911500 |
| C | -1.49433400 | 2.87443700  | -0.61976000 |
| C | -1.81879600 | 3.72308100  | 0.44755700  |
| C | -0.56960600 | 3.19619200  | -1.60606400 |
| C | -1.17427000 | 4.95131200  | 0.49962200  |
| C | 0.05241100  | 4.44507700  | -1.50368400 |
| C | -0.23744600 | 5.32939900  | -0.47055500 |
| H | -1.40412700 | 5.63266100  | 1.31506500  |
| H | 0.78669300  | 4.72098300  | -2.25598600 |
| C | -2.80151500 | 3.29412800  | 1.50282800  |
| H | -3.75597900 | 2.98393200  | 1.06439200  |
| H | -2.39644800 | 2.44607400  | 2.06583800  |
| H | -2.99543900 | 4.10929500  | 2.20102000  |
| C | 0.43142300  | 6.67659500  | -0.38774200 |
| H | -0.30016500 | 7.47979400  | -0.51769400 |
| H | 0.90017600  | 6.81844200  | 0.58991300  |
| H | 1.19844900  | 6.78675400  | -1.15633200 |

|   |             |             |             |
|---|-------------|-------------|-------------|
| C | -0.19570300 | 2.24652400  | -2.70829900 |
| H | 0.64613400  | 1.62195400  | -2.38198100 |
| H | -1.03176500 | 1.60257900  | -2.99309800 |
| H | 0.12108900  | 2.79959100  | -3.59481300 |
| C | -0.81262000 | 0.18873100  | 0.75437500  |
| O | -0.26337300 | 1.14794900  | 1.30034300  |
| C | -0.30770700 | -1.12952600 | 0.58493100  |
| H | 0.63415900  | -1.31725200 | 1.09285400  |
| H | -1.00265900 | -1.95812300 | 0.57202500  |
| C | 2.63691000  | -1.09036000 | -1.27444200 |
| C | 1.54204100  | -1.93751700 | -1.41866100 |
| C | 0.22529900  | -1.41842000 | -1.47198300 |
| H | 1.70942900  | -3.00868300 | -1.41796800 |
| H | 0.16048600  | -0.37276800 | -1.75975400 |
| C | -0.91713700 | -2.25353900 | -1.91729500 |
| C | -1.91150600 | -1.69243400 | -2.72585100 |
| C | -1.04879700 | -3.59083600 | -1.51755100 |
| C | -3.01857600 | -2.44200300 | -3.11765500 |
| H | -1.81374200 | -0.65903700 | -3.05328200 |
| C | -2.15817200 | -4.33719900 | -1.89988000 |
| H | -0.29186300 | -4.03615700 | -0.87723000 |
| C | -3.15025400 | -3.76278400 | -2.69602100 |
| H | -3.78110400 | -1.99467800 | -3.74701500 |
| H | -2.25408600 | -5.36652200 | -1.56994600 |
| H | -4.02034000 | -4.34234800 | -2.98601500 |
| C | 3.97249200  | -1.73381500 | -1.08310800 |
| C | 5.05135900  | -1.43249500 | -1.92033500 |
| C | 4.14328400  | -2.66304300 | -0.05130500 |
| C | 6.28378600  | -2.04713700 | -1.71922300 |
| H | 4.92124900  | -0.70832300 | -2.71605200 |
| C | 5.38136500  | -3.26199400 | 0.15955000  |
| H | 3.30502600  | -2.88904900 | 0.60201100  |
| C | 6.45444900  | -2.95433700 | -0.67486600 |
| H | 7.11460000  | -1.81501700 | -2.37804400 |
| H | 5.50910100  | -3.96670600 | 0.97522800  |
| H | 7.42051000  | -3.42258500 | -0.51447600 |
| N | 2.43059600  | 0.24144200  | -1.29562600 |
| S | 3.50343600  | 1.32538200  | -0.75931400 |
| O | 2.73755600  | 2.54992700  | -0.48698500 |
| O | 4.67849900  | 1.50445400  | -1.63102300 |
| C | 4.09246600  | 0.69088800  | 0.80020500  |
| C | 3.16397800  | 0.44106700  | 1.80880600  |
| C | 5.43972900  | 0.39470500  | 0.96947400  |
| C | 3.60312900  | -0.13050000 | 2.99838200  |

|   |            |             |            |
|---|------------|-------------|------------|
| H | 2.11348400 | 0.68556500  | 1.66199100 |
| C | 5.86124800 | -0.17305800 | 2.16722500 |
| H | 6.13447500 | 0.58446400  | 0.15810900 |
| C | 4.95139600 | -0.45200700 | 3.19136900 |
| H | 2.88830600 | -0.33125400 | 3.79180800 |
| H | 6.91150100 | -0.41579800 | 2.30572100 |
| C | 5.41449000 | -1.11142500 | 4.46433800 |
| H | 6.36458800 | -0.69136100 | 4.80383600 |
| H | 4.67831500 | -0.99429300 | 5.26217400 |
| H | 5.56951900 | -2.18382100 | 4.30611800 |

**17-r**

|   |             |             |             |
|---|-------------|-------------|-------------|
| C | 0.49610200  | 0.40078100  | -1.09849300 |
| O | 0.01817500  | 1.12037000  | -1.94103500 |
| C | 0.30444000  | -1.09251000 | -1.07627100 |
| H | -0.36764700 | -1.27932500 | -1.91413800 |
| H | 1.25762700  | -1.59647300 | -1.28039700 |
| C | -2.47606900 | -0.26803500 | 0.12606800  |
| C | -1.41108700 | -0.75872200 | 0.80045500  |
| C | -0.34378800 | -1.65839500 | 0.22189800  |
| H | -1.35882800 | -0.55964200 | 1.86580300  |
| H | -0.82156100 | -2.58172800 | -0.12393300 |
| C | 0.68345200  | -2.10381400 | 1.25057800  |
| C | 1.29791600  | -3.34898300 | 1.06269500  |
| C | 1.06064900  | -1.33873600 | 2.35811500  |
| C | 2.25833400  | -3.81923200 | 1.95317700  |
| H | 1.00614300  | -3.95512300 | 0.20651200  |
| C | 2.01906500  | -1.80816800 | 3.25707000  |
| H | 0.60700600  | -0.36646400 | 2.53609500  |
| C | 2.61696900  | -3.05017600 | 3.06079400  |
| H | 2.71610300  | -4.78999700 | 1.79113200  |
| H | 2.30214000  | -1.19593200 | 4.10656600  |
| H | 3.35862800  | -3.41625800 | 3.76335200  |
| C | -3.48632000 | 0.54306500  | 0.87132500  |
| C | -3.85436800 | 0.22611500  | 2.18455700  |
| C | -4.05170100 | 1.67166300  | 0.26956800  |
| C | -4.74217900 | 1.03358100  | 2.88953200  |
| H | -3.45402800 | -0.67134400 | 2.64767900  |
| C | -4.93559000 | 2.48318000  | 0.97465000  |
| H | -3.77548700 | 1.90908900  | -0.75305800 |
| C | -5.27921800 | 2.17208300  | 2.29004700  |
| H | -5.02166400 | 0.76964000  | 3.90488300  |
| H | -5.35451100 | 3.36525300  | 0.49851000  |
| H | -5.97096900 | 2.80343700  | 2.83873600  |

|   |             |             |             |
|---|-------------|-------------|-------------|
| N | -2.62221200 | -0.40877800 | -1.26115500 |
| S | -3.70995500 | -1.44064600 | -1.74847400 |
| O | -3.77617900 | -1.39541300 | -3.22068700 |
| O | -5.01239200 | -1.37562400 | -1.05015000 |
| C | -3.03694900 | -3.04774800 | -1.32416000 |
| C | -2.13018600 | -3.65510100 | -2.18835200 |
| C | -3.25310100 | -3.56863200 | -0.04812600 |
| C | -1.41763800 | -4.77405800 | -1.76360000 |
| H | -1.98006200 | -3.23980500 | -3.18038200 |
| C | -2.53141200 | -4.68279100 | 0.36708100  |
| H | -3.96912900 | -3.08912100 | 0.61225900  |
| C | -1.59374500 | -5.29175500 | -0.47614500 |
| H | -0.70726300 | -5.24695300 | -2.43644900 |
| H | -2.68733300 | -5.08491800 | 1.36490800  |
| C | -0.79501500 | -6.47438400 | 0.00827800  |
| H | -1.45187600 | -7.29711800 | 0.30542400  |
| H | -0.11746600 | -6.83999900 | -0.76592000 |
| H | -0.19768900 | -6.20343100 | 0.88517000  |
| C | 4.19915800  | -0.12594100 | -1.06885100 |
| C | 5.56826800  | -0.10927400 | -0.81160300 |
| C | 6.46846600  | 0.13459200  | -1.84634700 |
| C | 5.97909300  | 0.36763700  | -3.12824300 |
| C | 4.60479000  | 0.35288900  | -3.38112700 |
| C | 3.70354500  | 0.10249100  | -2.35078300 |
| C | 3.41138600  | -0.41000700 | 0.18914600  |
| C | 4.50282600  | -0.59787800 | 1.31295300  |
| C | 5.87657000  | -0.38000900 | 0.63547400  |
| H | 7.53655900  | 0.14611300  | -1.65286100 |
| H | 6.67145800  | 0.56220900  | -3.94071500 |
| H | 4.23664900  | 0.53284400  | -4.38525400 |
| H | 2.63832900  | 0.08851400  | -2.56504300 |
| H | 4.41028800  | -1.61709300 | 1.68606700  |
| H | 6.41765500  | 0.44773700  | 1.10514300  |
| H | 2.79165000  | -1.30438400 | 0.13011300  |
| H | 6.50206500  | -1.26848400 | 0.75428400  |
| C | 2.88862300  | 1.72970100  | 1.35712000  |
| C | 1.34684100  | 1.10218900  | -0.04407700 |
| N | 2.02450500  | 2.70641900  | 1.34137800  |
| N | 2.51148300  | 0.72229400  | 0.51664000  |
| N | 1.08341100  | 2.31435300  | 0.44818400  |
| C | 4.13957500  | 1.58279100  | 2.15865700  |
| H | 4.99296400  | 1.99147600  | 1.60176100  |
| H | 4.04199700  | 2.12593800  | 3.09858300  |
| O | 4.29451600  | 0.21270000  | 2.45271300  |

|   |             |            |             |
|---|-------------|------------|-------------|
| C | 0.04573300  | 3.25317500 | 0.07926000  |
| C | 0.27218600  | 4.03663400 | -1.05558400 |
| C | -1.05916700 | 3.40079800 | 0.91820900  |
| C | -0.70816300 | 4.97199900 | -1.38040200 |
| C | -2.00460600 | 4.35488700 | 0.54716500  |
| C | -1.85254600 | 5.13706600 | -0.59841700 |
| H | -0.56882500 | 5.58952100 | -2.26379200 |
| H | -2.88610800 | 4.48111000 | 1.17047400  |
| C | 1.52129500  | 3.88809100 | -1.88145400 |
| H | 2.41697300  | 3.88752200 | -1.25218600 |
| H | 1.50374300  | 2.95072000 | -2.44487700 |
| H | 1.60618700  | 4.71185800 | -2.59120100 |
| C | -2.90181400 | 6.15444500 | -0.96222800 |
| H | -2.72235000 | 6.57449400 | -1.95349800 |
| H | -3.89791300 | 5.70312700 | -0.95238200 |
| H | -2.90922800 | 6.97684800 | -0.24036300 |
| C | -1.21032700 | 2.60063600 | 2.18158200  |
| H | -1.01062400 | 1.54228600 | 1.99763100  |
| H | -0.50996500 | 2.95154200 | 2.94650800  |
| H | -2.22938100 | 2.68953300 | 2.56522500  |

**17-s**

|   |             |             |             |
|---|-------------|-------------|-------------|
| C | -3.67081800 | -1.39791300 | 1.70805800  |
| C | -5.01649700 | -1.16880200 | 2.01401000  |
| C | -5.41450300 | -0.98515800 | 3.33299900  |
| C | -4.45218000 | -1.03000300 | 4.34025900  |
| C | -3.11241300 | -1.27225200 | 4.03534700  |
| C | -2.71171100 | -1.46522500 | 2.71452400  |
| C | -3.50072800 | -1.55648300 | 0.21309700  |
| C | -4.95030000 | -1.86292700 | -0.25470000 |
| C | -5.86901900 | -1.17010000 | 0.77279800  |
| H | -6.45902000 | -0.81403700 | 3.57350200  |
| H | -4.74918000 | -0.88737500 | 5.37411500  |
| H | -2.37723300 | -1.32461700 | 4.83098200  |
| H | -1.67189200 | -1.68648800 | 2.50045300  |
| H | -5.07263500 | -2.94525000 | -0.17565300 |
| H | -6.11250500 | -0.14254100 | 0.47882500  |
| H | -2.78932300 | -2.31972600 | -0.10954800 |
| H | -6.81265600 | -1.70521100 | 0.89430900  |
| C | -3.84234600 | 0.39877800  | -1.35117000 |
| C | -2.03596700 | 0.51339400  | -0.15174600 |
| N | -3.31707900 | 1.56064100  | -1.63085200 |
| N | -3.09176100 | -0.27082300 | -0.42262300 |
| N | -2.19648900 | 1.62120700  | -0.86791500 |

|   |             |             |             |
|---|-------------|-------------|-------------|
| C | -5.08828800 | -0.19255500 | -1.93609300 |
| H | -5.96114900 | 0.37874100  | -1.59928900 |
| H | -5.03267800 | -0.12048100 | -3.02413500 |
| O | -5.18184100 | -1.55869200 | -1.61084500 |
| C | -1.47159000 | 2.86754800  | -0.74847500 |
| C | -1.85904500 | 3.70082800  | 0.31102200  |
| C | -0.50381000 | 3.20531200  | -1.68913700 |
| C | -1.21479000 | 4.92651600  | 0.41539500  |
| C | 0.10958500  | 4.45228900  | -1.53518300 |
| C | -0.22832000 | 5.31674900  | -0.49810800 |
| H | -1.49035100 | 5.59760600  | 1.22473200  |
| H | 0.87379500  | 4.74649000  | -2.24970200 |
| C | -2.92607700 | 3.27963000  | 1.28591400  |
| H | -3.84279500 | 2.97713500  | 0.76920000  |
| H | -2.58373100 | 2.43305000  | 1.89046900  |
| H | -3.17096000 | 4.10191600  | 1.95900600  |
| C | 0.44045500  | 6.65857700  | -0.35611000 |
| H | -0.29144700 | 7.46606300  | -0.45103800 |
| H | 0.90740600  | 6.75603900  | 0.62785700  |
| H | 1.20916000  | 6.80119100  | -1.11741600 |
| C | -0.08303100 | 2.27454300  | -2.79207600 |
| H | 0.76111000  | 1.66256800  | -2.44742500 |
| H | -0.89650300 | 1.61352500  | -3.10240400 |
| H | 0.24179600  | 2.84441200  | -3.66469900 |
| C | -0.80540800 | 0.22257700  | 0.70283200  |
| O | -0.52287900 | 1.03015800  | 1.55338500  |
| C | 0.00877800  | -0.99471700 | 0.35762900  |
| H | 0.96592500  | -0.85268500 | 0.86305800  |
| H | -0.47191000 | -1.88301100 | 0.78536200  |
| C | 2.68503400  | -0.82508000 | -1.25014400 |
| C | 1.64846200  | -1.67946700 | -1.41258900 |
| C | 0.23111200  | -1.21964000 | -1.17533000 |
| H | 1.82024100  | -2.69517600 | -1.75304900 |
| H | 0.11079600  | -0.24818700 | -1.66984400 |
| C | -0.79170300 | -2.17470600 | -1.75539000 |
| C | -1.70174400 | -1.74966900 | -2.72496300 |
| C | -0.86614100 | -3.49696600 | -1.30073800 |
| C | -2.69558800 | -2.60525900 | -3.19784400 |
| H | -1.64144500 | -0.73013400 | -3.10351700 |
| C | -1.85241100 | -4.35822400 | -1.77534300 |
| H | -0.15285900 | -3.84966100 | -0.55874800 |
| C | -2.77898500 | -3.90943300 | -2.71619300 |
| H | -3.40628800 | -2.25123600 | -3.93768600 |
| H | -1.90277800 | -5.37715700 | -1.40518700 |

|   |             |             |             |
|---|-------------|-------------|-------------|
| H | -3.55673100 | -4.57480500 | -3.07607000 |
| C | 4.07182400  | -1.34046700 | -1.46433200 |
| C | 4.98147400  | -0.65919300 | -2.28038100 |
| C | 4.47276000  | -2.53855000 | -0.86286300 |
| C | 6.26067900  | -1.16596100 | -2.48801900 |
| H | 4.68045900  | 0.27804400  | -2.73478900 |
| C | 5.75417600  | -3.04428200 | -1.06540500 |
| H | 3.77551000  | -3.05699800 | -0.21101600 |
| C | 6.65308900  | -2.35746900 | -1.87822400 |
| H | 6.95508900  | -0.62932300 | -3.12730600 |
| H | 6.05293100  | -3.96895800 | -0.58111500 |
| H | 7.65442000  | -2.74659200 | -2.03428400 |
| N | 2.39598100  | 0.50534100  | -0.95146300 |
| S | 3.35820000  | 1.40769700  | -0.06733600 |
| O | 2.57131500  | 2.56903900  | 0.38905300  |
| O | 4.65770300  | 1.76297200  | -0.67800600 |
| C | 3.77181000  | 0.47102800  | 1.40386800  |
| C | 2.83097300  | 0.36372500  | 2.42610800  |
| C | 5.00170700  | -0.17296400 | 1.50198600  |
| C | 3.12883900  | -0.39844200 | 3.55150100  |
| H | 1.87855800  | 0.87966700  | 2.33609300  |
| C | 5.28651800  | -0.93137800 | 2.63385800  |
| H | 5.72137800  | -0.07411700 | 0.69492500  |
| C | 4.35687500  | -1.05824600 | 3.67042900  |
| H | 2.40061300  | -0.47887900 | 4.35411600  |
| H | 6.24805900  | -1.43150100 | 2.71647700  |
| C | 4.66520100  | -1.90515800 | 4.87802700  |
| H | 5.72479100  | -1.84947700 | 5.13889700  |
| H | 4.07778000  | -1.59056600 | 5.74337600  |
| H | 4.43050300  | -2.95661600 | 4.68220300  |

**18-ts-r**

|   |             |            |             |
|---|-------------|------------|-------------|
| C | 0.36612900  | 0.87976300 | 0.37946300  |
| O | 0.74018500  | 1.33566900 | 1.47115800  |
| C | 0.38326300  | 1.80679600 | -0.83628700 |
| H | -0.21386200 | 2.67049400 | -0.54204300 |
| H | 1.40568100  | 2.18094000 | -0.95429100 |
| C | -2.11974500 | 0.27622100 | -0.92849900 |
| C | -1.40470700 | 0.50209700 | -2.05103400 |
| C | -0.11021400 | 1.24935800 | -2.17396400 |
| H | -1.82428700 | 0.14769300 | -2.98896900 |
| H | -0.32949200 | 2.13411800 | -2.79054200 |
| C | 0.97550700  | 0.49858600 | -2.94006900 |
| C | 2.03000400  | 1.22468900 | -3.50387600 |

|   |             |             |             |
|---|-------------|-------------|-------------|
| C | 0.95403500  | -0.88543900 | -3.11800400 |
| C | 3.03413300  | 0.58410500  | -4.22547600 |
| H | 2.05529000  | 2.30645800  | -3.38798800 |
| C | 1.96302100  | -1.53351800 | -3.82853900 |
| H | 0.13638700  | -1.45863000 | -2.69559800 |
| C | 3.00580200  | -0.80035700 | -4.38639500 |
| H | 3.83840400  | 1.16696100  | -4.66445700 |
| H | 1.92960900  | -2.61310500 | -3.94474900 |
| H | 3.79279600  | -1.30190100 | -4.93992700 |
| C | -3.47749500 | -0.33886600 | -1.05871800 |
| C | -4.27819100 | -0.05045700 | -2.17044700 |
| C | -3.96641300 | -1.22774400 | -0.09681800 |
| C | -5.51431000 | -0.66934200 | -2.34001700 |
| H | -3.93946900 | 0.68089000  | -2.89794100 |
| C | -5.19551500 | -1.85374500 | -0.26855900 |
| H | -3.37100200 | -1.42222900 | 0.78839400  |
| C | -5.97408300 | -1.58118800 | -1.39332800 |
| H | -6.12118800 | -0.42843900 | -3.20714000 |
| H | -5.54701900 | -2.55747100 | 0.48115900  |
| H | -6.93704900 | -2.06507900 | -1.52317000 |
| N | -1.56541800 | 0.47643600  | 0.36035900  |
| S | -2.37916500 | 1.39562000  | 1.44310400  |
| O | -1.81828900 | 1.12445600  | 2.76678900  |
| O | -3.83142700 | 1.26079000  | 1.28604000  |
| C | -2.02847700 | 3.09609200  | 1.04328300  |
| C | -1.07035200 | 3.80238600  | 1.76123400  |
| C | -2.66684400 | 3.66281700  | -0.06014500 |
| C | -0.74900900 | 5.09749800  | 1.36392000  |
| H | -0.57233200 | 3.32448000  | 2.59646800  |
| C | -2.32566200 | 4.95222500  | -0.44943100 |
| H | -3.41742100 | 3.09631500  | -0.60379600 |
| C | -1.36374700 | 5.68665500  | 0.25555300  |
| H | -0.00146700 | 5.65781200  | 1.91851300  |
| H | -2.81256900 | 5.40019400  | -1.31114900 |
| C | -1.02367100 | 7.09381500  | -0.16022500 |
| H | -1.74420200 | 7.80296800  | 0.25989200  |
| H | -0.03074000 | 7.38171800  | 0.19107200  |
| H | -1.05387100 | 7.20142600  | -1.24703300 |
| C | 4.03830900  | 0.15817700  | 1.31568400  |
| C | 5.41776400  | 0.05900800  | 1.15067900  |
| C | 6.24272400  | -0.07287800 | 2.26443900  |
| C | 5.66271100  | -0.10570900 | 3.53117700  |
| C | 4.27833900  | 0.00045700  | 3.68716200  |
| C | 3.44897600  | 0.13863700  | 2.57614100  |



|   |             |             |             |
|---|-------------|-------------|-------------|
| C | 3.34913700  | 0.28707800  | -0.02880100 |
| C | 4.47179900  | -0.05570500 | -1.07333300 |
| C | 5.79729300  | 0.13476100  | -0.30588000 |
| H | 7.31898100  | -0.15561700 | 2.14706700  |
| H | 6.29393400  | -0.21477800 | 4.40740000  |
| H | 3.84584300  | -0.02302500 | 4.68204600  |
| H | 2.37257200  | 0.24502900  | 2.67856900  |
| H | 4.39045700  | 0.60108700  | -1.93917700 |
| H | 6.51932300  | -0.62751300 | -0.61195000 |
| H | 2.96177500  | 1.29172400  | -0.19026200 |
| H | 6.23220800  | 1.11195600  | -0.54047900 |
| C | 2.51289900  | -1.98970200 | -0.33073300 |
| C | 0.91518900  | -0.55203500 | 0.10796900  |
| N | 1.44623500  | -2.71151800 | -0.18349900 |
| N | 2.23751200  | -0.66768200 | -0.14103100 |
| N | 0.45148500  | -1.80877000 | 0.10548100  |
| C | 3.90626800  | -2.36062300 | -0.72258900 |
| H | 4.54750700  | -2.44511200 | 0.16501500  |
| H | 3.90319500  | -3.31238000 | -1.25393200 |
| O | 4.35538100  | -1.36255600 | -1.61574100 |
| C | -0.75243900 | -2.41379200 | 0.64497100  |
| C | -0.94160200 | -2.32148800 | 2.03079200  |
| C | -1.52338700 | -3.24136800 | -0.17167000 |
| C | -1.99775300 | -3.04286100 | 2.58068400  |
| C | -2.54196800 | -3.97582300 | 0.44126600  |
| C | -2.80380100 | -3.88154200 | 1.80451400  |
| H | -2.17174500 | -2.97664700 | 3.65191300  |
| H | -3.16058100 | -4.61894300 | -0.17915400 |
| C | -0.00909000 | -1.52619600 | 2.90133500  |
| H | 1.02780700  | -1.85117600 | 2.74996300  |
| H | -0.07498100 | -0.45567400 | 2.68419300  |
| H | -0.25705100 | -1.68043700 | 3.95293700  |
| C | -3.92083800 | -4.66562000 | 2.44204700  |
| H | -4.60501300 | -4.00032900 | 2.97688100  |
| H | -4.49310200 | -5.21827700 | 1.69427900  |
| H | -3.52850400 | -5.38163800 | 3.17045200  |
| C | -1.32644200 | -3.33542400 | -1.65957400 |
| H | -1.69636200 | -2.42326500 | -2.14170100 |
| H | -0.27400000 | -3.46548100 | -1.92370400 |
| H | -1.88861000 | -4.17997400 | -2.06129600 |

**18-ts-s**

|   |             |             |             |
|---|-------------|-------------|-------------|
| C | -4.68602500 | -1.26797000 | -0.97072800 |
| C | -6.05795300 | -1.29647500 | -0.73236300 |

|   |             |             |             |
|---|-------------|-------------|-------------|
| C | -6.83864200 | -2.30257900 | -1.29450400 |
| C | -6.22106700 | -3.26914600 | -2.08609800 |
| C | -4.84371100 | -3.23154000 | -2.31947000 |
| C | -4.05866400 | -2.22333600 | -1.76415800 |
| C | -4.04859600 | -0.09341900 | -0.25839900 |
| C | -5.16671300 | 0.42776300  | 0.71377200  |
| C | -6.48263400 | -0.14929200 | 0.14914500  |
| H | -7.90829400 | -2.33846300 | -1.11234300 |
| H | -6.81658400 | -4.06332000 | -2.52499100 |
| H | -4.38262600 | -3.99328600 | -2.93947200 |
| H | -2.98876800 | -2.16603100 | -1.94621900 |
| H | -5.16974900 | 1.51768600  | 0.73894100  |
| H | -7.14243300 | -0.44841800 | 0.96859800  |
| H | -3.74301100 | 0.68379300  | -0.95594000 |
| H | -7.00869500 | 0.61414400  | -0.43295200 |
| C | -3.06084100 | -1.25091400 | 1.65392100  |
| C | -1.55414700 | -0.51629500 | 0.23496700  |
| N | -1.93548400 | -1.72364300 | 2.08691000  |
| N | -2.87531100 | -0.52138300 | 0.51507300  |
| N | -0.99981700 | -1.27030100 | 1.18863300  |
| C | -4.43618900 | -1.26751800 | 2.23986900  |
| H | -5.06370400 | -2.02706600 | 1.75669100  |
| H | -4.38634100 | -1.47064300 | 3.30916800  |
| O | -4.94427000 | 0.04269500  | 2.06401600  |
| C | 0.32047600  | -1.82665500 | 1.38097500  |
| C | 0.79873400  | -2.75197600 | 0.44486900  |
| C | 0.95268100  | -1.56957400 | 2.59748700  |
| C | 1.97752600  | -3.42138000 | 0.76562100  |
| C | 2.11659500  | -2.28953000 | 2.87828800  |
| C | 2.64222200  | -3.21415900 | 1.97929400  |
| H | 2.37796200  | -4.14127200 | 0.05505500  |
| H | 2.63383700  | -2.09818900 | 3.81488800  |
| C | 0.06951100  | -3.02694900 | -0.84066500 |
| H | -0.98506900 | -3.25955700 | -0.65207700 |
| H | 0.10429700  | -2.16045400 | -1.51073700 |
| H | 0.51664800  | -3.88345300 | -1.34937000 |
| C | 3.91384800  | -3.96372800 | 2.28078100  |
| H | 4.33799900  | -3.65522900 | 3.23828700  |
| H | 3.73327900  | -5.04214600 | 2.31633000  |
| H | 4.66049400  | -3.78501700 | 1.50047400  |
| C | 0.41996000  | -0.55143300 | 3.57055200  |
| H | 0.03682400  | 0.32716800  | 3.04266700  |
| H | -0.39716200 | -0.96651500 | 4.16736200  |
| H | 1.21384600  | -0.22954500 | 4.24689300  |

|   |             |             |             |
|---|-------------|-------------|-------------|
| C | -1.12316500 | 0.23019700  | -1.06391600 |
| O | -1.45834400 | -0.38203400 | -2.08159600 |
| C | -1.30718800 | 1.74645200  | -0.99780400 |
| H | -0.63452000 | 2.17424800  | -1.74673900 |
| H | -2.32842300 | 1.98072500  | -1.31624800 |
| C | 1.22289000  | 1.19622700  | 0.26842900  |
| C | 0.35017700  | 2.04614500  | 0.84308100  |
| C | -1.03936900 | 2.36599000  | 0.37148000  |
| H | 0.69250800  | 2.59584200  | 1.71629400  |
| H | -1.77457200 | 1.97311400  | 1.09222600  |
| C | -1.25454800 | 3.86966600  | 0.30841100  |
| C | -2.37913900 | 4.45612300  | 0.88906200  |
| C | -0.33771600 | 4.68319300  | -0.36512700 |
| C | -2.58785200 | 5.83181700  | 0.80206100  |
| H | -3.09570700 | 3.83055100  | 1.41615900  |
| C | -0.54387700 | 6.05638400  | -0.45436400 |
| H | 0.54004700  | 4.22805600  | -0.81923800 |
| C | -1.67013700 | 6.63506500  | 0.13074900  |
| H | -3.46614000 | 6.27466600  | 1.26119800  |
| H | 0.17501100  | 6.67724700  | -0.97986500 |
| H | -1.82952800 | 7.70648500  | 0.06369500  |
| C | 2.62194600  | 1.17763000  | 0.79464400  |
| C | 3.27959900  | 2.37913300  | 1.08094200  |
| C | 3.29524200  | -0.02570000 | 1.01404800  |
| C | 4.57472000  | 2.37289000  | 1.59398800  |
| H | 2.77640400  | 3.32095800  | 0.87980200  |
| C | 4.58261900  | -0.03603400 | 1.53535500  |
| H | 2.80406200  | -0.95078900 | 0.74428900  |
| C | 5.22829700  | 1.16500800  | 1.82866700  |
| H | 5.07567800  | 3.31303700  | 1.80300500  |
| H | 5.08548300  | -0.98532700 | 1.70182600  |
| H | 6.23876300  | 1.15983500  | 2.22591200  |
| N | 0.84689200  | 0.26854000  | -0.74607900 |
| S | 1.63526000  | 0.41058900  | -2.17778600 |
| O | 1.68974200  | 1.81676100  | -2.62052700 |
| O | 1.05594900  | -0.56899300 | -3.10102100 |
| C | 3.32820600  | -0.10696500 | -1.95744000 |
| C | 4.35376700  | 0.83016300  | -1.90424800 |
| C | 3.58387900  | -1.46743100 | -1.81866100 |
| C | 5.65193400  | 0.39293300  | -1.67170200 |
| H | 4.12533200  | 1.88419700  | -2.02091000 |
| C | 4.88643800  | -1.88896100 | -1.57695800 |
| H | 2.76628800  | -2.18027700 | -1.88178700 |
| C | 5.93279200  | -0.96497000 | -1.48574000 |

|   |            |             |             |
|---|------------|-------------|-------------|
| H | 6.46004500 | 1.11704200  | -1.61262600 |
| H | 5.09492000 | -2.94831600 | -1.45280200 |
| C | 7.33180400 | -1.41094500 | -1.15313200 |
| H | 7.46653000 | -2.47816500 | -1.34052200 |
| H | 8.07320800 | -0.85782900 | -1.73498100 |
| H | 7.54300100 | -1.22625100 | -0.09398500 |

**19-r**

|   |             |             |             |
|---|-------------|-------------|-------------|
| C | -0.17585000 | 0.80947100  | 0.08709700  |
| O | -0.67958000 | 1.51516300  | -0.88444000 |
| C | -0.52586700 | 1.34680200  | 1.50243000  |
| H | -0.06722300 | 2.33905500  | 1.53291600  |
| H | -1.60093500 | 1.50439100  | 1.59120300  |
| C | 2.03421700  | 0.19312900  | 1.20756500  |
| C | 1.35373100  | -0.02810000 | 2.34907400  |
| C | -0.01522700 | 0.49229200  | 2.66529700  |
| H | 1.84676500  | -0.60911100 | 3.12323100  |
| H | 0.09610300  | 1.16052900  | 3.53187900  |
| C | -1.01138100 | -0.57750200 | 3.09961600  |
| C | -2.20767900 | -0.18211900 | 3.70958600  |
| C | -0.78002200 | -1.94097500 | 2.92018900  |
| C | -3.14417300 | -1.12450800 | 4.12362200  |
| H | -2.40067200 | 0.87679600  | 3.87064600  |
| C | -1.72119400 | -2.88911900 | 3.32048200  |
| H | 0.14732500  | -2.26487800 | 2.46323800  |
| C | -2.90605700 | -2.48422400 | 3.92545700  |
| H | -4.06252000 | -0.79673600 | 4.60189200  |
| H | -1.52050000 | -3.94454300 | 3.15987300  |
| H | -3.64077700 | -3.21829600 | 4.23989500  |
| C | 3.44573500  | -0.27110200 | 1.07407300  |
| C | 4.27291000  | -0.32372100 | 2.20322300  |
| C | 3.97512300  | -0.66709700 | -0.15726800 |
| C | 5.57802700  | -0.79839500 | 2.11058400  |
| H | 3.90323600  | 0.03583900  | 3.15826500  |
| C | 5.27981800  | -1.13628800 | -0.25193500 |
| H | 3.35436000  | -0.61102200 | -1.04614800 |
| C | 6.08691000  | -1.21153400 | 0.88167600  |
| H | 6.20147100  | -0.82833100 | 2.99851900  |
| H | 5.66417400  | -1.45030000 | -1.21831700 |
| H | 7.10589900  | -1.57733700 | 0.80567400  |
| N | 1.37379100  | 0.73743900  | 0.05937300  |
| S | 2.09463100  | 2.04482800  | -0.75514100 |
| O | 1.93619600  | 1.83685600  | -2.18954400 |
| O | 3.45133100  | 2.16422200  | -0.22144500 |

|   |             |             |             |
|---|-------------|-------------|-------------|
| C | 1.29767400  | 3.57666900  | -0.30849800 |
| C | 0.33830400  | 4.13786600  | -1.14534600 |
| C | 1.71496900  | 4.21917500  | 0.85302800  |
| C | -0.21040000 | 5.36571000  | -0.80359100 |
| H | 0.02763200  | 3.59725100  | -2.03016500 |
| C | 1.13682900  | 5.43994500  | 1.19078700  |
| H | 2.48060100  | 3.77174200  | 1.47865300  |
| C | 0.17335100  | 6.02997200  | 0.36864600  |
| H | -0.95746600 | 5.81692200  | -1.45053600 |
| H | 1.44653200  | 5.94547600  | 2.10074200  |
| C | -0.42355400 | 7.36808800  | 0.71561900  |
| H | 0.08556200  | 8.16799400  | 0.16835400  |
| H | -1.48145100 | 7.40804200  | 0.44540900  |
| H | -0.32734400 | 7.58075100  | 1.78226900  |
| C | -3.78749700 | 0.10843500  | -1.34482400 |
| C | -5.15781300 | -0.14263100 | -1.34396000 |
| C | -5.88239700 | -0.05593000 | -2.52988000 |
| C | -5.21298400 | 0.28380900  | -3.70414500 |
| C | -3.84118900 | 0.55017200  | -3.69242800 |
| C | -3.11329600 | 0.47301500  | -2.50656200 |
| C | -3.21334800 | -0.04818600 | 0.05019200  |
| C | -4.37227500 | -0.72171600 | 0.86927000  |
| C | -5.65054100 | -0.46182300 | 0.04380200  |
| H | -6.94976900 | -0.25509600 | -2.53998200 |
| H | -5.76410300 | 0.34602500  | -4.63724300 |
| H | -3.33922600 | 0.82499500  | -4.61464100 |
| H | -2.05433700 | 0.70932000  | -2.45765100 |
| H | -4.42586400 | -0.29180200 | 1.86906800  |
| H | -6.30819700 | -1.33476600 | 0.08742100  |
| H | -2.93601200 | 0.91636300  | 0.46659900  |
| H | -6.20390800 | 0.38615900  | 0.46089000  |
| C | -2.20546700 | -2.25943600 | -0.16121100 |
| C | -0.70280100 | -0.66338300 | -0.06437600 |
| N | -1.08515900 | -2.85104500 | -0.43160300 |
| N | -2.02617400 | -0.92010900 | 0.04054800  |
| N | -0.15058900 | -1.84144700 | -0.38803500 |
| C | -3.58125300 | -2.81324100 | 0.01996500  |
| H | -4.16375400 | -2.71674600 | -0.90621500 |
| H | -3.52459000 | -3.86561700 | 0.29868000  |
| O | -4.16324100 | -2.10718400 | 1.09559800  |
| C | 1.10493400  | -2.16151800 | -1.03595300 |
| C | 1.26957600  | -1.69670500 | -2.34767600 |
| C | 1.97440100  | -3.08083100 | -0.44569100 |
| C | 2.39483800  | -2.13116400 | -3.04637200 |

|   |             |             |             |
|---|-------------|-------------|-------------|
| C | 3.06520600  | -3.50851900 | -1.20259800 |
| C | 3.29835200  | -3.04145700 | -2.49441700 |
| H | 2.54949900  | -1.77069100 | -4.06022500 |
| H | 3.76255500  | -4.21339600 | -0.75692800 |
| C | 0.25004200  | -0.80611500 | -3.00034300 |
| H | -0.74065400 | -1.27714500 | -2.97393400 |
| H | 0.18059900  | 0.16372000  | -2.49526900 |
| H | 0.51386100  | -0.63714500 | -4.04595500 |
| C | 4.48057600  | -3.53024900 | -3.28987100 |
| H | 4.85426300  | -2.75130400 | -3.95855100 |
| H | 5.29461700  | -3.84516800 | -2.63286300 |
| H | 4.20107400  | -4.38991300 | -3.90751600 |
| C | 1.79057700  | -3.57977300 | 0.96005900  |
| H | 2.06444200  | -2.79352500 | 1.67329300  |
| H | 0.75557500  | -3.87481200 | 1.15119500  |
| H | 2.43529400  | -4.44039800 | 1.14489200  |

**19-s**

|   |             |             |             |
|---|-------------|-------------|-------------|
| C | 3.79633700  | -1.80335200 | 0.44000800  |
| C | 4.99824700  | -2.37779900 | 0.03363600  |
| C | 5.95369100  | -2.72837600 | 0.98299000  |
| C | 5.67765900  | -2.49882200 | 2.33020000  |
| C | 4.46673300  | -1.92469000 | 2.72567800  |
| C | 3.50683400  | -1.56672600 | 1.78041000  |
| C | 2.92264400  | -1.49762900 | -0.75595200 |
| C | 3.61610400  | -2.24582100 | -1.95639300 |
| C | 5.05624800  | -2.51992200 | -1.46609900 |
| H | 6.89321500  | -3.18088500 | 0.68031200  |
| H | 6.41112300  | -2.77404800 | 3.08163500  |
| H | 4.27167300  | -1.75778200 | 3.78011300  |
| H | 2.55564700  | -1.11553200 | 2.06135900  |
| H | 3.60249900  | -1.61456500 | -2.84554600 |
| H | 5.38003800  | -3.51067600 | -1.79812200 |
| H | 2.90318900  | -0.43678500 | -0.98479700 |
| H | 5.74633900  | -1.78897200 | -1.89961200 |
| C | 1.30160000  | -3.30837900 | -0.72136300 |
| C | 0.38520800  | -1.39120100 | -0.13491600 |
| N | 0.07283600  | -3.60257700 | -0.44702100 |
| N | 1.54059500  | -1.96910000 | -0.56124700 |
| N | -0.48670100 | -2.40655000 | -0.07952400 |
| C | 2.38751000  | -4.16560900 | -1.28089300 |
| H | 3.13408500  | -4.41045200 | -0.51423000 |
| H | 1.96623200  | -5.08750500 | -1.68032600 |
| O | 2.94675800  | -3.43107900 | -2.35306100 |

|   |             |             |             |
|---|-------------|-------------|-------------|
| C | -1.89570400 | -2.48743300 | 0.23045100  |
| C | -2.28776800 | -2.59211400 | 1.56774000  |
| C | -2.76730300 | -2.67080600 | -0.84359900 |
| C | -3.64159800 | -2.82076100 | 1.80985800  |
| C | -4.10177500 | -2.94787400 | -0.54487800 |
| C | -4.55810600 | -3.00925800 | 0.77054300  |
| H | -3.98267100 | -2.88916100 | 2.84022400  |
| H | -4.80433300 | -3.08471700 | -1.36298800 |
| C | -1.28002600 | -2.53874900 | 2.68083300  |
| H | -0.64818600 | -3.43456200 | 2.64827400  |
| H | -0.63742500 | -1.65760600 | 2.58732000  |
| H | -1.78714300 | -2.51393400 | 3.64713900  |
| C | -6.01267100 | -3.25620100 | 1.07699000  |
| H | -6.56339600 | -3.54476100 | 0.17945700  |
| H | -6.12897600 | -4.04604800 | 1.82399400  |
| H | -6.47889000 | -2.35347600 | 1.48513500  |
| C | -2.29095700 | -2.55746200 | -2.26706800 |
| H | -1.69386500 | -1.64985000 | -2.40599900 |
| H | -1.66535900 | -3.41200400 | -2.54325200 |
| H | -3.14171400 | -2.51619700 | -2.94924500 |
| C | 0.29702700  | 0.03844800  | 0.56248800  |
| O | 0.63535400  | -0.13432100 | 1.80272400  |
| C | 1.14429400  | 1.07574200  | -0.20238500 |
| H | 0.89573500  | 2.04373400  | 0.23973200  |
| H | 2.20157400  | 0.92128800  | 0.02182300  |
| C | -1.57073000 | 0.88573700  | -0.93382800 |
| C | -0.64736800 | 1.05458400  | -1.90092700 |
| C | 0.84064100  | 1.11682100  | -1.69867700 |
| H | -0.99852300 | 1.15127300  | -2.92354400 |
| H | 1.28407600  | 0.24309300  | -2.20145800 |
| C | 1.44765300  | 2.35171000  | -2.34353900 |
| C | 2.60598100  | 2.25822400  | -3.11552300 |
| C | 0.87765100  | 3.61092600  | -2.13001600 |
| C | 3.18975900  | 3.40039700  | -3.66152100 |
| H | 3.05467700  | 1.28358500  | -3.29382900 |
| C | 1.45747500  | 4.75288500  | -2.67355200 |
| H | -0.02905100 | 3.68836200  | -1.53395000 |
| C | 2.61702000  | 4.65034800  | -3.44145900 |
| H | 4.09069400  | 3.31260700  | -4.26060800 |
| H | 1.00326500  | 5.72366100  | -2.50069700 |
| H | 3.06895500  | 5.54019300  | -3.86762400 |
| C | -3.02193900 | 0.92361800  | -1.27255500 |
| C | -3.46889600 | 1.72178000  | -2.33276600 |
| C | -3.96067900 | 0.17024200  | -0.56247700 |

|   |             |             |             |
|---|-------------|-------------|-------------|
| C | -4.80971400 | 1.72685900  | -2.70553400 |
| H | -2.76692000 | 2.36498700  | -2.85457800 |
| C | -5.29947300 | 0.17180700  | -0.93659700 |
| H | -3.63729100 | -0.41911800 | 0.28938400  |
| C | -5.73083900 | 0.94419200  | -2.01353500 |
| H | -5.13471400 | 2.35384000  | -3.52968300 |
| H | -6.00799100 | -0.43656100 | -0.38149500 |
| H | -6.77739700 | 0.94724200  | -2.30120000 |
| N | -1.17627100 | 0.50070400  | 0.38730100  |
| S | -1.76667900 | 1.40198600  | 1.70677100  |
| O | -1.95293900 | 0.50950100  | 2.84121100  |
| O | -2.92564300 | 2.14309700  | 1.21283300  |
| C | -0.56612700 | 2.64982100  | 2.12326100  |
| C | 0.39921000  | 2.42391600  | 3.09841200  |
| C | -0.62836600 | 3.85488200  | 1.42534500  |
| C | 1.32359400  | 3.42776600  | 3.36505800  |
| H | 0.42759800  | 1.46955700  | 3.60837100  |
| C | 0.31642500  | 4.83837700  | 1.69292000  |
| H | -1.41102400 | 4.01472000  | 0.69092100  |
| C | 1.30679600  | 4.63677900  | 2.66081900  |
| H | 2.07868900  | 3.26883900  | 4.12941200  |
| H | 0.28061000  | 5.77783400  | 1.14866300  |
| C | 2.34412900  | 5.69619500  | 2.92296300  |
| H | 1.91691000  | 6.69721400  | 2.82986200  |
| H | 2.77484600  | 5.59043500  | 3.92063000  |
| H | 3.16002700  | 5.61759900  | 2.19717600  |

**20-ts-r**

|   |             |             |             |
|---|-------------|-------------|-------------|
| C | 0.03204200  | 1.06368100  | -0.05780900 |
| O | -0.28503300 | 1.60777900  | -1.11918600 |
| C | -0.62071600 | 1.50767200  | 1.24334200  |
| H | -0.20403200 | 2.51472700  | 1.37872100  |
| H | -1.68838200 | 1.64983800  | 1.07572200  |
| C | 1.88930600  | 0.15086300  | 1.34978500  |
| C | 1.03629000  | 0.02493000  | 2.37930500  |
| C | -0.30673000 | 0.67733500  | 2.49964800  |
| H | 1.34769400  | -0.59405800 | 3.21562400  |
| H | -0.21991200 | 1.39874000  | 3.32460100  |
| C | -1.39454700 | -0.28912500 | 2.95794900  |
| C | -2.47919000 | 0.21353200  | 3.68588300  |
| C | -1.32263300 | -1.66717600 | 2.74023300  |
| C | -3.45397700 | -0.63772100 | 4.20025400  |
| H | -2.54513500 | 1.28340200  | 3.87134700  |
| C | -2.30009400 | -2.52338900 | 3.24583900  |



|   |             |             |             |
|---|-------------|-------------|-------------|
| H | -0.48630100 | -2.07356700 | 2.17887200  |
| C | -3.36131500 | -2.01357300 | 3.98924400  |
| H | -4.27839800 | -0.22836600 | 4.77569800  |
| H | -2.22307500 | -3.59112100 | 3.06571700  |
| H | -4.11473500 | -2.68102900 | 4.39500800  |
| C | 3.24010800  | -0.47295400 | 1.40207500  |
| C | 3.91007300  | -0.57552300 | 2.62784900  |
| C | 3.86396900  | -0.96869100 | 0.25453600  |
| C | 5.15683000  | -1.18728500 | 2.70814100  |
| H | 3.46452500  | -0.14832500 | 3.52063500  |
| C | 5.11415200  | -1.57229900 | 0.33413800  |
| H | 3.36447700  | -0.88404000 | -0.70654500 |
| C | 5.76504800  | -1.69022700 | 1.55994700  |
| H | 5.66017600  | -1.25552000 | 3.66735000  |
| H | 5.57520400  | -1.95981600 | -0.56994300 |
| H | 6.74148500  | -2.16028900 | 1.61967500  |
| N | 1.46662100  | 0.77151900  | 0.13131500  |
| S | 2.48117100  | 1.93774200  | -0.61421300 |
| O | 2.50943000  | 1.67701100  | -2.04543800 |
| O | 3.73475500  | 1.93396300  | 0.13092000  |
| C | 1.74266600  | 3.52777600  | -0.32030900 |
| C | 1.02308200  | 4.16543500  | -1.32425600 |
| C | 1.94004900  | 4.11931000  | 0.92635700  |
| C | 0.48911100  | 5.42236400  | -1.06732100 |
| H | 0.88497000  | 3.67467400  | -2.28030500 |
| C | 1.38552100  | 5.37051000  | 1.16832800  |
| H | 2.52228200  | 3.60923600  | 1.68739500  |
| C | 0.65261300  | 6.03637500  | 0.17927600  |
| H | -0.06766100 | 5.93509700  | -1.84599600 |
| H | 1.53094600  | 5.84176000  | 2.13581800  |
| C | 0.03356900  | 7.37917000  | 0.46208700  |
| H | -0.14215100 | 7.93547200  | -0.46073500 |
| H | -0.93084100 | 7.25491200  | 0.96510800  |
| H | 0.67117400  | 7.97808000  | 1.11612500  |
| C | -3.92682500 | 0.27774900  | -1.08075900 |
| C | -5.30192400 | 0.05408700  | -1.08977000 |
| C | -6.09126100 | 0.59824500  | -2.09906600 |
| C | -5.48111000 | 1.36074100  | -3.09337000 |
| C | -4.10112800 | 1.57869000  | -3.07859100 |
| C | -3.30726500 | 1.03827000  | -2.06809900 |
| C | -3.27464900 | -0.41172900 | 0.10081700  |
| C | -4.40737400 | -1.33713400 | 0.68348300  |
| C | -5.72354000 | -0.79778300 | 0.07904700  |
| H | -7.16298400 | 0.42383000  | -2.11625900 |

|   |             |             |             |
|---|-------------|-------------|-------------|
| H | -6.08345000 | 1.78587800  | -3.89011200 |
| H | -3.64324000 | 2.17347800  | -3.86254100 |
| H | -2.23369100 | 1.20839800  | -2.03790200 |
| H | -4.40466300 | -1.27799100 | 1.77109900  |
| H | -6.37526000 | -1.63001600 | -0.20388100 |
| H | -2.96928900 | 0.28934300  | 0.87505500  |
| H | -6.26296000 | -0.20073600 | 0.82186300  |
| C | -2.30549800 | -2.40561900 | -0.89123900 |
| C | -0.76603500 | -0.90628100 | -0.26939900 |
| N | -1.18403900 | -2.93244900 | -1.26406600 |
| N | -2.10369300 | -1.18921200 | -0.29730700 |
| N | -0.25278200 | -1.98653300 | -0.88197300 |
| C | -3.68563400 | -2.97312900 | -0.88924400 |
| H | -4.30228100 | -2.52595900 | -1.68053700 |
| H | -3.65062500 | -4.05301300 | -1.03163900 |
| O | -4.21366100 | -2.71504100 | 0.39996300  |
| C | 1.09113800  | -2.27893600 | -1.29900700 |
| C | 1.53360100  | -1.73353900 | -2.50950500 |
| C | 1.81928900  | -3.23232600 | -0.58764100 |
| C | 2.76772600  | -2.16436100 | -2.99405900 |
| C | 3.03127700  | -3.65861800 | -1.13160400 |
| C | 3.51946500  | -3.13782700 | -2.32889600 |
| H | 3.13872300  | -1.75003500 | -3.92872400 |
| H | 3.61808600  | -4.39661300 | -0.59016000 |
| C | 0.68416000  | -0.74694800 | -3.26251100 |
| H | -0.29254700 | -1.18479500 | -3.49900500 |
| H | 0.51506600  | 0.15587700  | -2.66715600 |
| H | 1.17053800  | -0.46257200 | -4.19745500 |
| C | 4.82980900  | -3.61033500 | -2.90487700 |
| H | 4.66493100  | -4.20901200 | -3.80628700 |
| H | 5.46037600  | -2.76303500 | -3.18926700 |
| H | 5.37917900  | -4.22434700 | -2.18785300 |
| C | 1.34802300  | -3.73597900 | 0.74912900  |
| H | 1.52304400  | -2.96538900 | 1.51080300  |
| H | 0.27939700  | -3.96830200 | 0.74262400  |
| H | 1.89909500  | -4.63100600 | 1.04281900  |

**20-ts-s**

|   |             |             |             |
|---|-------------|-------------|-------------|
| C | -3.76619800 | -1.76269000 | -0.47760100 |
| C | -5.00240000 | -2.30742400 | -0.13535600 |
| C | -6.00629900 | -2.41110800 | -1.09314900 |
| C | -5.74750000 | -1.96685400 | -2.38927500 |
| C | -4.50458300 | -1.42543500 | -2.72404900 |
| C | -3.49522600 | -1.31681300 | -1.76729500 |

|   |             |             |             |
|---|-------------|-------------|-------------|
| C | -2.84459300 | -1.74429700 | 0.72441600  |
| C | -3.55748500 | -2.67841900 | 1.76824200  |
| C | -5.03343400 | -2.71051300 | 1.31733600  |
| H | -6.97120600 | -2.83964300 | -0.83889800 |
| H | -6.51893300 | -2.04972400 | -3.14832800 |
| H | -4.32125300 | -1.08951800 | -3.73959100 |
| H | -2.52184500 | -0.89835200 | -2.01669200 |
| H | -3.44641300 | -2.27134400 | 2.77456300  |
| H | -5.45746900 | -3.70401800 | 1.48703300  |
| H | -2.76608800 | -0.74476900 | 1.15111300  |
| H | -5.62133900 | -1.99689000 | 1.90477200  |
| C | -1.31110200 | -3.57581300 | 0.28792300  |
| C | -0.31436000 | -1.57652100 | 0.20148800  |
| N | -0.07736000 | -3.84772500 | 0.00794400  |
| N | -1.49856300 | -2.22432600 | 0.42020000  |
| N | 0.51311100  | -2.60221700 | -0.05125900 |
| C | -2.45060200 | -4.47684900 | 0.62932800  |
| H | -3.19752000 | -4.49979300 | -0.17463200 |
| H | -2.09108100 | -5.48880200 | 0.81406000  |
| O | -2.99303000 | -3.98051400 | 1.84276000  |
| C | 1.93761400  | -2.60919500 | -0.24587300 |
| C | 2.44346400  | -2.59538900 | -1.54823400 |
| C | 2.74074700  | -2.78492400 | 0.88162600  |
| C | 3.82151400  | -2.74843000 | -1.69865900 |
| C | 4.10859900  | -2.96743900 | 0.67784300  |
| C | 4.66394700  | -2.95163500 | -0.60125500 |
| H | 4.24452900  | -2.73099200 | -2.70044800 |
| H | 4.75597000  | -3.10137500 | 1.54109000  |
| C | 1.52062100  | -2.44691600 | -2.72611200 |
| H | 0.79668400  | -3.26873200 | -2.74722400 |
| H | 0.96477500  | -1.50634600 | -2.66274500 |
| H | 2.08737100  | -2.46160700 | -3.65896200 |
| C | 6.14358000  | -3.15335000 | -0.80702000 |
| H | 6.68683600  | -3.09094800 | 0.13848600  |
| H | 6.34415800  | -4.13553100 | -1.24667400 |
| H | 6.55006700  | -2.40249100 | -1.49034400 |
| C | 2.14418800  | -2.74520600 | 2.26265300  |
| H | 1.68703900  | -1.76627300 | 2.44790300  |
| H | 1.36145100  | -3.50117800 | 2.38025600  |
| H | 2.91073800  | -2.91769000 | 3.01961400  |
| C | -0.20797300 | 0.28941100  | -0.70393200 |
| O | -0.50844400 | 0.03421800  | -1.87446200 |
| C | -1.16547600 | 1.07722200  | 0.17614300  |
| H | -1.08189600 | 2.11172100  | -0.18460000 |

|   |             |             |             |
|---|-------------|-------------|-------------|
| H | -2.18796600 | 0.76045700  | -0.04450100 |
| C | 1.57815500  | 0.98327800  | 0.90157200  |
| C | 0.64946400  | 1.09442800  | 1.86611500  |
| C | -0.83692900 | 1.03748300  | 1.66684800  |
| H | 0.99839000  | 1.17142400  | 2.89144000  |
| H | -1.17202500 | 0.08029000  | 2.08988500  |
| C | -1.56206800 | 2.14003800  | 2.41877000  |
| C | -2.64375800 | 1.84518800  | 3.24888900  |
| C | -1.17155400 | 3.47395100  | 2.26558600  |
| C | -3.32936100 | 2.86301100  | 3.91104500  |
| H | -2.95066600 | 0.81013500  | 3.38342400  |
| C | -1.85298600 | 4.49218900  | 2.92458900  |
| H | -0.32386600 | 3.70997300  | 1.62585900  |
| C | -2.93573300 | 4.18847900  | 3.74990500  |
| H | -4.16908700 | 2.61770200  | 4.55347500  |
| H | -1.53789400 | 5.52317600  | 2.79700400  |
| H | -3.46664500 | 4.98201900  | 4.26571300  |
| C | 3.02454200  | 1.01232900  | 1.24899000  |
| C | 3.47565500  | 1.84604800  | 2.27818800  |
| C | 3.94599300  | 0.19902100  | 0.58562800  |
| C | 4.81451100  | 1.84156300  | 2.65800900  |
| H | 2.77704500  | 2.51932200  | 2.76618900  |
| C | 5.28294900  | 0.19331300  | 0.96696800  |
| H | 3.60907400  | -0.43169400 | -0.23146100 |
| C | 5.72347100  | 1.01118300  | 2.00620100  |
| H | 5.14899700  | 2.49754700  | 3.45537700  |
| H | 5.98164600  | -0.45746200 | 0.44851800  |
| H | 6.76863500  | 1.00878000  | 2.29881800  |
| N | 1.20686200  | 0.66918800  | -0.44608200 |
| S | 1.85761900  | 1.63081500  | -1.71207800 |
| O | 2.03570900  | 0.79170300  | -2.88526200 |
| O | 3.01247600  | 2.32867700  | -1.16199200 |
| C | 0.63138700  | 2.87206000  | -2.03290300 |
| C | -0.30271900 | 2.70715900  | -3.04899100 |
| C | 0.60753000  | 3.98394000  | -1.18999100 |
| C | -1.28399600 | 3.67957900  | -3.21619800 |
| H | -0.26293000 | 1.82562700  | -3.67756800 |
| C | -0.38906900 | 4.93527300  | -1.36455600 |
| H | 1.36168800  | 4.09764800  | -0.41726000 |
| C | -1.34937100 | 4.79418900  | -2.37456100 |
| H | -2.01656400 | 3.56648500  | -4.00958500 |
| H | -0.42025500 | 5.80347800  | -0.71238100 |
| C | -2.43810000 | 5.82165400  | -2.53362700 |
| H | -2.03972600 | 6.83344500  | -2.42709400 |

|   |             |            |             |
|---|-------------|------------|-------------|
| H | -2.92337400 | 5.73770500 | -3.50764900 |
| H | -3.20333700 | 5.68747500 | -1.76266200 |

**21-ts**

|   |             |             |             |
|---|-------------|-------------|-------------|
| C | 2.73675600  | 1.47100400  | -0.78279500 |
| C | 4.10437900  | 1.78888100  | -1.31092600 |
| C | 4.88107200  | 1.50295200  | 0.88023700  |
| C | 3.65102000  | 0.76813000  | 1.42133800  |
| C | 1.20032200  | 0.91236500  | 0.73159900  |
| H | 4.22143900  | 1.37088300  | -2.31217000 |
| H | 5.76902200  | 1.16840300  | 1.42008300  |
| H | 3.40744100  | 1.20167200  | 2.39485800  |
| N | 1.60659600  | 1.59563200  | -1.40850000 |
| N | 0.67770000  | 1.24435800  | -0.45441800 |
| N | 2.53603200  | 1.06931400  | 0.51283500  |
| H | 4.76165200  | 2.58532800  | 1.03335100  |
| H | 4.21725400  | 2.88119300  | -1.36853600 |
| O | 5.10055200  | 1.22535100  | -0.48997400 |
| C | 3.83004600  | -0.75464100 | 1.57922500  |
| H | 4.67474200  | -0.91172500 | 2.25818100  |
| H | 2.92991300  | -1.14679300 | 2.06399200  |
| C | 4.03780000  | -1.50118200 | 0.28316800  |
| C | 5.31546100  | -1.80063300 | -0.19486100 |
| C | 2.92649100  | -1.90036100 | -0.46523400 |
| C | 5.48111700  | -2.46858100 | -1.40446600 |
| H | 6.18639300  | -1.50082800 | 0.38281800  |
| C | 3.08856100  | -2.56213800 | -1.68099200 |
| H | 1.93229900  | -1.70656100 | -0.06706500 |
| C | 4.36741200  | -2.84542000 | -2.15492100 |
| H | 6.48010000  | -2.69566300 | -1.76357000 |
| H | 2.21531700  | -2.86682100 | -2.25067300 |
| H | 4.49757800  | -3.36396300 | -3.09948000 |
| C | -0.70510400 | 1.30125500  | -0.84095100 |
| C | -1.41310700 | 2.47990000  | -0.61155200 |
| C | -1.25713900 | 0.19699600  | -1.49486700 |
| C | -2.72805300 | 2.54214300  | -1.07555100 |
| C | -2.57759500 | 0.29878300  | -1.92579300 |
| C | -3.32281600 | 1.46431800  | -1.73201400 |
| H | -3.30251100 | 3.44979200  | -0.90654000 |
| H | -3.03801000 | -0.55358800 | -2.42077800 |
| C | -0.77890300 | 3.61992400  | 0.13797000  |
| H | -0.56796200 | 3.32183100  | 1.17084700  |
| H | 0.17155100  | 3.91456200  | -0.31734400 |
| H | -1.44003500 | 4.48768700  | 0.15603700  |

|   |             |             |             |
|---|-------------|-------------|-------------|
| C | -4.75758800 | 1.52401300  | -2.18729700 |
| H | -5.36875700 | 0.81014500  | -1.62295400 |
| H | -5.18041300 | 2.52027500  | -2.04301700 |
| H | -4.84572700 | 1.26169500  | -3.24547600 |
| C | -0.44476800 | -1.05378200 | -1.69153000 |
| H | 0.46786000  | -0.84452600 | -2.25973600 |
| H | -0.14138300 | -1.46020700 | -0.72029300 |
| H | -1.02345700 | -1.81294400 | -2.22085900 |
| C | 0.28089700  | -0.20409900 | 2.18774500  |
| O | 0.49744900  | -1.37213900 | 1.86531900  |
| C | 0.87495200  | 0.42089900  | 3.43334300  |
| H | 0.78790300  | 1.50743500  | 3.41653900  |
| H | 0.31762700  | 0.02955300  | 4.29042800  |
| H | 1.91762200  | 0.12322000  | 3.54050400  |
| O | -1.01656200 | 0.37373400  | 2.05121200  |
| C | -2.11229000 | -0.25493100 | 1.56400300  |
| C | -3.25019500 | 0.56804300  | 1.53193000  |
| C | -2.20326600 | -1.59127400 | 1.13975500  |
| C | -4.45014200 | 0.09757500  | 1.03894400  |
| H | -3.15479500 | 1.58851400  | 1.88488700  |
| C | -3.40798300 | -2.06102500 | 0.63685100  |
| H | -1.34122800 | -2.23659800 | 1.18705700  |
| C | -4.50855400 | -1.21426800 | 0.57540100  |
| H | -5.32806400 | 0.73042800  | 0.99649800  |
| H | -3.49604600 | -3.08096300 | 0.28319700  |
| N | -5.75338500 | -1.70909700 | 0.01208600  |
| O | -5.81739900 | -2.88465400 | -0.31322200 |
| O | -6.68262000 | -0.92253800 | -0.11600400 |

## 22

|   |             |             |             |
|---|-------------|-------------|-------------|
| C | -2.70238600 | -1.55966200 | -0.45140700 |
| C | -4.07826000 | -2.03191200 | -0.81698600 |
| C | -4.75622200 | -1.35438100 | 1.31241000  |
| C | -3.53380100 | -0.49318600 | 1.64808100  |
| C | -1.11986800 | -0.67753000 | 0.78621900  |
| H | -4.26186900 | -1.83935600 | -1.87508700 |
| H | -5.62659800 | -0.94712200 | 1.83012300  |
| H | -3.22435800 | -0.74770700 | 2.66303400  |
| N | -1.60925400 | -1.74131300 | -1.12742700 |
| N | -0.63327200 | -1.18804600 | -0.34573500 |
| N | -2.44972600 | -0.91690600 | 0.73382600  |
| H | -4.59041900 | -2.38498600 | 1.65703700  |
| H | -4.13736600 | -3.11488200 | -0.63695100 |
| O | -5.05052500 | -1.34234100 | -0.07049200 |

|   |             |             |             |
|---|-------------|-------------|-------------|
| C | -3.76838800 | 1.02631900  | 1.54765500  |
| H | -4.55406900 | 1.26860700  | 2.27072900  |
| H | -2.84813900 | 1.52912900  | 1.86115900  |
| C | -4.14300800 | 1.51198000  | 0.16778200  |
| C | -5.47639800 | 1.70620000  | -0.19923200 |
| C | -3.13721600 | 1.76706600  | -0.76996600 |
| C | -5.80253100 | 2.12849300  | -1.48450900 |
| H | -6.26407100 | 1.51923300  | 0.52666600  |
| C | -3.46236600 | 2.18171300  | -2.06027800 |
| H | -2.09742000 | 1.66516400  | -0.46242400 |
| C | -4.79588400 | 2.35983000  | -2.42148700 |
| H | -6.84288500 | 2.27755700  | -1.75620000 |
| H | -2.67261400 | 2.37820600  | -2.77960400 |
| H | -5.05075200 | 2.68725900  | -3.42440700 |
| C | 0.72181600  | -1.25719200 | -0.83748400 |
| C | 1.44889000  | -2.41839400 | -0.57720800 |
| C | 1.21346800  | -0.19403900 | -1.59441700 |
| C | 2.73996700  | -2.49257100 | -1.09675200 |
| C | 2.51560400  | -0.31102100 | -2.08028100 |
| C | 3.29327700  | -1.44280100 | -1.83299700 |
| H | 3.33657000  | -3.37876400 | -0.89438900 |
| H | 2.93520200  | 0.51004700  | -2.65708800 |
| C | 0.87177700  | -3.50678600 | 0.28517600  |
| H | 0.67627300  | -3.11875300 | 1.29119000  |
| H | -0.07574400 | -3.87816200 | -0.11684400 |
| H | 1.56597000  | -4.34447400 | 0.36621400  |
| C | 4.72397400  | -1.49590200 | -2.30043700 |
| H | 5.35888300  | -0.89994200 | -1.63345000 |
| H | 5.10597000  | -2.51888600 | -2.30204400 |
| H | 4.82908400  | -1.08253700 | -3.30668200 |
| C | 0.37437900  | 1.02879300  | -1.84305300 |
| H | -0.55709700 | 0.76337600  | -2.35620200 |
| H | 0.10892800  | 1.49593900  | -0.88743100 |
| H | 0.91683500  | 1.74816900  | -2.45869400 |
| C | -0.38588200 | 0.28374400  | 1.79047200  |
| O | -0.50164400 | 1.48291200  | 1.34741700  |
| C | -0.79183800 | 0.04211000  | 3.25108300  |
| H | -0.79837900 | -1.01811500 | 3.51895100  |
| H | -0.04888400 | 0.55545400  | 3.86532300  |
| H | -1.76350500 | 0.49055100  | 3.46133800  |
| O | 1.00468400  | -0.35945000 | 1.78875300  |
| C | 2.14302900  | 0.25039500  | 1.44453800  |
| C | 3.28084000  | -0.58269000 | 1.49413800  |
| C | 2.29569000  | 1.59715600  | 1.05197100  |

|   |            |             |             |
|---|------------|-------------|-------------|
| C | 4.51449700 | -0.12978600 | 1.07786300  |
| H | 3.15126200 | -1.60390000 | 1.83488000  |
| C | 3.53797300 | 2.05230600  | 0.64100200  |
| H | 1.43697100 | 2.24970400  | 1.05315300  |
| C | 4.62767500 | 1.18606100  | 0.63041300  |
| H | 5.38329400 | -0.77678600 | 1.08455900  |
| H | 3.66726500 | 3.07610000  | 0.31104500  |
| N | 5.90622400 | 1.65610600  | 0.14076800  |
| O | 6.02498000 | 2.84055000  | -0.14085900 |
| O | 6.81638000 | 0.84396900  | 0.02120800  |

**23-ts**

|   |             |             |             |
|---|-------------|-------------|-------------|
| C | 2.81398400  | 0.19849200  | 1.48931600  |
| C | 4.16214800  | 0.12405800  | 2.14549300  |
| C | 4.13749500  | -2.16295500 | 1.65892200  |
| C | 3.02428100  | -2.12427700 | 0.60910800  |
| C | 1.03014400  | -0.50703800 | 0.43945300  |
| H | 4.72401300  | 1.03384700  | 1.92927800  |
| H | 4.81875800  | -2.98139100 | 1.42151700  |
| H | 2.36626200  | -2.97462800 | 0.79352800  |
| N | 2.00018900  | 1.21215500  | 1.48211500  |
| N | 0.89735300  | 0.76171000  | 0.82252700  |
| N | 2.25203900  | -0.88637000 | 0.86512400  |
| H | 3.70377700  | -2.33891000 | 2.65299800  |
| H | 4.01641200  | 0.04413600  | 3.23190500  |
| O | 4.89676100  | -0.97091300 | 1.65426600  |
| C | 3.50978800  | -2.16210800 | -0.85425000 |
| H | 4.20163400  | -3.00631000 | -0.93434200 |
| H | 2.65073100  | -2.39965200 | -1.48906400 |
| C | 4.14647100  | -0.89252100 | -1.36879300 |
| C | 5.51688800  | -0.65278900 | -1.23515300 |
| C | 3.35325100  | 0.06304000  | -2.00907500 |
| C | 6.07992100  | 0.52314400  | -1.72047700 |
| H | 6.14223400  | -1.39067000 | -0.74101500 |
| C | 3.91525100  | 1.24151900  | -2.49859500 |
| H | 2.28828400  | -0.12723200 | -2.13952100 |
| C | 5.27973800  | 1.47453700  | -2.35241800 |
| H | 7.14574700  | 0.69569400  | -1.61037400 |
| H | 3.28792400  | 1.97004800  | -3.00331900 |
| H | 5.71998000  | 2.38916000  | -2.73609000 |
| C | -0.22883600 | 1.65372400  | 0.68327300  |
| C | -1.08052100 | 1.80162100  | 1.78312000  |
| C | -0.35548900 | 2.39482000  | -0.49099600 |
| C | -2.15965900 | 2.66828400  | 1.63463200  |



|   |             |             |             |
|---|-------------|-------------|-------------|
| C | -1.45301500 | 3.25320200  | -0.58573600 |
| C | -2.37300600 | 3.38463400  | 0.45365700  |
| H | -2.84978000 | 2.79236900  | 2.46545300  |
| H | -1.58227900 | 3.83669100  | -1.49381300 |
| C | -0.82366500 | 1.07514200  | 3.07480400  |
| H | -0.77421400 | -0.00140700 | 2.89569600  |
| H | 0.12421400  | 1.39794100  | 3.51705000  |
| H | -1.62143400 | 1.27946800  | 3.79078800  |
| C | -3.58009000 | 4.27338400  | 0.30936600  |
| H | -4.45328700 | 3.68211000  | 0.01422200  |
| H | -3.82210600 | 4.76723500  | 1.25343700  |
| H | -3.42170700 | 5.03776100  | -0.45410500 |
| C | 0.64822500  | 2.28673400  | -1.60377500 |
| H | 1.66908900  | 2.31159800  | -1.21106100 |
| H | 0.51476400  | 1.34006700  | -2.13496500 |
| H | 0.52910200  | 3.11214100  | -2.30783000 |
| C | 0.04521100  | -1.29368100 | -0.43352800 |
| O | -0.30002700 | -0.72793400 | -1.46896800 |
| C | 0.02960700  | -2.80178600 | -0.30904800 |
| H | 0.17149300  | -3.13525200 | 0.71870600  |
| H | -0.95232200 | -3.13379800 | -0.65289900 |
| H | 0.78103400  | -3.24828100 | -0.96695800 |
| O | -1.31855900 | -1.11507200 | 0.98836800  |
| C | -2.52145600 | -1.14964500 | 0.50487400  |
| C | -3.40526000 | -2.21176600 | 0.85197400  |
| C | -3.00815800 | -0.15160100 | -0.38762100 |
| C | -4.69296600 | -2.26670000 | 0.36282400  |
| H | -3.03544800 | -2.97659300 | 1.52742200  |
| C | -4.29470400 | -0.20901000 | -0.88324600 |
| H | -2.34859700 | 0.66443000  | -0.65677400 |
| C | -5.13263300 | -1.26352900 | -0.50686700 |
| H | -5.36597800 | -3.07159800 | 0.63284500  |
| H | -4.67113800 | 0.55268800  | -1.55614000 |
| N | -6.47587300 | -1.31628500 | -1.02287900 |
| O | -6.85016900 | -0.42797400 | -1.78229800 |
| O | -7.19935600 | -2.24832100 | -0.68539300 |

**24**

|   |            |             |            |
|---|------------|-------------|------------|
| C | 2.73980300 | 0.02286900  | 1.48644700 |
| C | 4.02552300 | -0.19464200 | 2.22979900 |
| C | 3.89526800 | -2.43172400 | 1.55008700 |
| C | 2.87234400 | -2.23021400 | 0.42844600 |
| C | 1.00718100 | -0.46920700 | 0.25408400 |
| H | 4.66004500 | 0.68676100  | 2.12637300 |

|   |             |             |             |
|---|-------------|-------------|-------------|
| H | 4.54110000  | -3.27211100 | 1.29187800  |
| H | 2.15233000  | -3.04716200 | 0.49032100  |
| N | 1.99640100  | 1.09090600  | 1.49790200  |
| N | 0.92535900  | 0.77546500  | 0.72307000  |
| N | 2.16045900  | -0.96917100 | 0.73929800  |
| H | 3.37200000  | -2.66183900 | 2.48837600  |
| H | 3.79020400  | -0.34264000 | 3.29312600  |
| O | 4.72516400  | -1.29918200 | 1.70895700  |
| C | 3.46019800  | -2.17261700 | -0.99682000 |
| H | 4.10510700  | -3.04986000 | -1.10738100 |
| H | 2.63737400  | -2.29898700 | -1.70832700 |
| C | 4.20796500  | -0.90534500 | -1.34087000 |
| C | 5.57465100  | -0.76972400 | -1.08254200 |
| C | 3.52642800  | 0.15929500  | -1.93674100 |
| C | 6.24044500  | 0.41068000  | -1.39710200 |
| H | 6.11443100  | -1.59153500 | -0.62124200 |
| C | 4.19014600  | 1.34376300  | -2.25295400 |
| H | 2.46835500  | 0.05299700  | -2.17332200 |
| C | 5.54911400  | 1.47203200  | -1.98013100 |
| H | 7.30203400  | 0.50169100  | -1.19104700 |
| H | 3.64896300  | 2.15819600  | -2.72478500 |
| H | 6.07051400  | 2.39061300  | -2.22843800 |
| C | -0.15652500 | 1.72569600  | 0.61267100  |
| C | -0.98201500 | 1.89570900  | 1.73134300  |
| C | -0.27425300 | 2.48666400  | -0.55075500 |
| C | -2.03533900 | 2.79701300  | 1.60520400  |
| C | -1.35211000 | 3.37152600  | -0.62384800 |
| C | -2.25316300 | 3.51991600  | 0.42932600  |
| H | -2.70482000 | 2.93933900  | 2.44980400  |
| H | -1.47471900 | 3.96958400  | -1.52338500 |
| C | -0.72628700 | 1.17125100  | 3.02479100  |
| H | -0.64710900 | 0.09669200  | 2.84785200  |
| H | 0.20141100  | 1.52391200  | 3.48566400  |
| H | -1.54462400 | 1.35212400  | 3.72394800  |
| C | -3.44061000 | 4.43782000  | 0.30745800  |
| H | -4.32985100 | 3.86880500  | 0.01647800  |
| H | -3.66082400 | 4.92739600  | 1.25897100  |
| H | -3.27369300 | 5.20561300  | -0.45075800 |
| C | 0.73208000  | 2.40582500  | -1.66546200 |
| H | 1.74172500  | 2.27537800  | -1.26627400 |
| H | 0.51528500  | 1.56173300  | -2.32481600 |
| H | 0.71399900  | 3.32414300  | -2.25516800 |
| C | 0.04698200  | -1.13688800 | -0.71722000 |
| O | -0.41473600 | -0.44303400 | -1.59754800 |

|   |             |             |             |
|---|-------------|-------------|-------------|
| C | -0.11933500 | -2.63162500 | -0.67399800 |
| H | -0.01320500 | -3.02570100 | 0.33505900  |
| H | -1.12813700 | -2.84502500 | -1.03327700 |
| H | 0.59174500  | -3.10939200 | -1.35582500 |
| O | -1.40220900 | -1.06616900 | 1.09735800  |
| C | -2.58224500 | -1.12710400 | 0.61826400  |
| C | -3.44292700 | -2.24362500 | 0.89836500  |
| C | -3.11508200 | -0.10820500 | -0.24560500 |
| C | -4.71654500 | -2.32501900 | 0.38920600  |
| H | -3.05257600 | -3.02618200 | 1.54180400  |
| C | -4.38876200 | -0.19591600 | -0.75721500 |
| H | -2.48263300 | 0.74156600  | -0.48182100 |
| C | -5.19564600 | -1.30014300 | -0.44116400 |
| H | -5.35905900 | -3.16883900 | 0.61239200  |
| H | -4.78700600 | 0.57707200  | -1.40479200 |
| N | -6.51779500 | -1.38389000 | -0.97276300 |
| O | -6.92458600 | -0.48035200 | -1.70362000 |
| O | -7.21401500 | -2.35824500 | -0.68543700 |

#### 25-ts

|   |            |             |             |
|---|------------|-------------|-------------|
| C | 2.74435200 | -0.54381600 | 1.57780900  |
| C | 4.02548300 | -0.76747600 | 2.32473800  |
| C | 4.65792200 | -2.24166400 | 0.62246400  |
| C | 3.58015800 | -1.85631500 | -0.39779800 |
| C | 1.31392500 | -0.74003000 | -0.05087100 |
| H | 4.32975500 | 0.15695900  | 2.81694200  |
| H | 5.54760600 | -2.57723400 | 0.08714800  |
| H | 3.12774800 | -2.77578500 | -0.77544500 |
| N | 1.70050400 | 0.13941900  | 1.95553800  |
| N | 0.82079300 | 0.01013300  | 0.92538000  |
| N | 2.53721400 | -1.12121000 | 0.35184100  |
| H | 4.29358900 | -3.06445400 | 1.25264100  |
| H | 3.86273400 | -1.54217400 | 3.08671700  |
| O | 5.04099000 | -1.14203600 | 1.42521300  |
| C | 4.06540600 | -1.01183100 | -1.59172800 |
| H | 4.88617900 | -1.56739400 | -2.05582600 |
| H | 3.25519900 | -0.97620300 | -2.32902200 |
| C | 4.49332500 | 0.39368000  | -1.24309800 |
| C | 5.80730000 | 0.67987100  | -0.86342900 |
| C | 3.56207700 | 1.43472300  | -1.28982300 |
| C | 6.17894700 | 1.97674600  | -0.52365000 |
| H | 6.54178000 | -0.12065100 | -0.82915800 |
| C | 3.93118500 | 2.73484900  | -0.94755100 |
| H | 2.54489800 | 1.22974200  | -1.62099100 |

|   |             |             |             |
|---|-------------|-------------|-------------|
| C | 5.24038700  | 3.00739800  | -0.56094300 |
| H | 7.20365900  | 2.18506600  | -0.23301300 |
| H | 3.19764100  | 3.53419100  | -0.99677700 |
| H | 5.53185600  | 4.01923900  | -0.29872400 |
| C | -0.50179200 | 0.58063300  | 1.02068200  |
| C | -1.48466200 | -0.17404600 | 1.66495800  |
| C | -0.71408700 | 1.86803900  | 0.52160600  |
| C | -2.74539400 | 0.40732900  | 1.79215500  |
| C | -1.99637100 | 2.39291500  | 0.66273500  |
| C | -3.01831500 | 1.68074100  | 1.29624400  |
| H | -3.53456200 | -0.15851200 | 2.27963400  |
| H | -2.19812600 | 3.39001900  | 0.27872100  |
| C | -1.20055200 | -1.55710800 | 2.18658900  |
| H | -1.06140800 | -2.25996700 | 1.35725100  |
| H | -0.30287300 | -1.57270400 | 2.81164300  |
| H | -2.04258300 | -1.91150200 | 2.78359700  |
| C | -4.38608400 | 2.29228800  | 1.44773500  |
| H | -4.72048200 | 2.73212800  | 0.50379400  |
| H | -5.12137000 | 1.54581400  | 1.75898200  |
| H | -4.37311900 | 3.09005700  | 2.19716400  |
| C | 0.38540700  | 2.65024600  | -0.14293800 |
| H | 1.33514800  | 2.53357300  | 0.38756600  |
| H | 0.53007300  | 2.29510000  | -1.16807300 |
| H | 0.13465200  | 3.71192200  | -0.17079300 |
| C | 0.65355500  | -0.98429000 | -1.40646900 |
| O | 0.35701000  | 0.03218800  | -2.02446800 |
| C | 0.36937000  | -2.34639400 | -1.74521200 |
| H | 1.00482200  | -3.08903500 | -1.26349300 |
| H | -0.80362100 | -2.58522900 | -1.23780000 |
| H | 0.25034600  | -2.49917400 | -2.81739900 |
| O | -1.95980600 | -2.97508200 | -0.69499700 |
| C | -2.90538800 | -2.09230000 | -0.71172200 |
| C | -4.08222400 | -2.30777000 | 0.06580300  |
| C | -2.83525800 | -0.88743400 | -1.47597700 |
| C | -5.11803000 | -1.40228000 | 0.07092400  |
| H | -4.13717000 | -3.21899400 | 0.65218100  |
| C | -3.87400800 | 0.01611600  | -1.47133500 |
| H | -1.94790400 | -0.68310700 | -2.06742000 |
| C | -5.01483600 | -0.23788800 | -0.70040000 |
| H | -6.01156300 | -1.57443400 | 0.65971200  |
| H | -3.82104900 | 0.93109100  | -2.04997600 |
| N | -6.09169100 | 0.70552500  | -0.70093000 |
| O | -6.02066600 | 1.68742700  | -1.43824000 |
| O | -7.05007400 | 0.50937500  | 0.04354500  |

26<sup>ArOH</sup>

|   |             |             |             |
|---|-------------|-------------|-------------|
| C | 2.83862600  | -0.61337200 | 1.51250100  |
| C | 4.15884100  | -0.78514400 | 2.20456300  |
| C | 4.81284700  | -2.13631200 | 0.40707400  |
| C | 3.68959800  | -1.74909400 | -0.55992700 |
| C | 1.36249200  | -0.83804100 | -0.08132000 |
| H | 4.42566100  | 0.13639900  | 2.72308700  |
| H | 5.70370900  | -2.39830900 | -0.16576000 |
| H | 3.27712800  | -2.66112000 | -0.99628100 |
| N | 1.76258600  | -0.03664700 | 1.96516700  |
| N | 0.85463000  | -0.18273400 | 0.95632100  |
| N | 2.62780300  | -1.13614800 | 0.26358000  |
| H | 4.50532400  | -3.00817200 | 1.00082300  |
| H | 4.07176000  | -1.59656900 | 2.94066100  |
| O | 5.16575100  | -1.06359200 | 1.26059500  |
| C | 4.09011800  | -0.79412300 | -1.70067600 |
| H | 4.95027500  | -1.24569000 | -2.20484100 |
| H | 3.26447400  | -0.78331400 | -2.42005600 |
| C | 4.39661700  | 0.61989700  | -1.26806600 |
| C | 5.68338800  | 1.00040700  | -0.87802500 |
| C | 3.37237900  | 1.57138900  | -1.24717500 |
| C | 5.94019300  | 2.30324000  | -0.46232500 |
| H | 6.48601700  | 0.26795000  | -0.89467300 |
| C | 3.62769200  | 2.87668800  | -0.82815000 |
| H | 2.37489500  | 1.28434800  | -1.57988000 |
| C | 4.91127400  | 3.24434600  | -0.43276000 |
| H | 6.94445200  | 2.58625300  | -0.16351900 |
| H | 2.82495200  | 3.60812400  | -0.82290500 |
| H | 5.11277300  | 4.26090700  | -0.11080000 |
| C | -0.50218300 | 0.26449100  | 1.14631400  |
| C | -1.40146600 | -0.62869800 | 1.73323400  |
| C | -0.82886700 | 1.57945100  | 0.81069400  |
| C | -2.68996100 | -0.16032500 | 1.98796400  |
| C | -2.13009700 | 1.99696000  | 1.08290500  |
| C | -3.06663100 | 1.14708100  | 1.67699000  |
| H | -3.41531700 | -0.83562500 | 2.43453900  |
| H | -2.41827400 | 3.01357700  | 0.82704200  |
| C | -0.98645700 | -2.03482300 | 2.07671000  |
| H | -0.67468100 | -2.58073100 | 1.18065900  |
| H | -0.14802900 | -2.03674800 | 2.78033300  |
| H | -1.81851300 | -2.57800600 | 2.52710300  |
| C | -4.45329200 | 1.64432200  | 1.99355600  |
| H | -4.75404600 | 2.43287900  | 1.29862300  |

|   |             |             |             |
|---|-------------|-------------|-------------|
| H | -5.18576900 | 0.83423500  | 1.94138000  |
| H | -4.49138700 | 2.06169100  | 3.00489000  |
| C | 0.18235000  | 2.48579100  | 0.16760900  |
| H | 1.12000500  | 2.49545900  | 0.73229900  |
| H | 0.40306000  | 2.11524200  | -0.83865700 |
| H | -0.19711300 | 3.50682400  | 0.10465400  |
| C | 0.70258900  | -1.04778100 | -1.43517100 |
| O | 0.36154100  | 0.02770500  | -2.00457300 |
| C | 0.57777200  | -2.35772400 | -1.82528100 |
| H | 0.97589600  | -3.16088200 | -1.21464400 |
| H | -1.27162200 | -2.65493900 | -1.21003100 |
| H | 0.22783300  | -2.58781500 | -2.82632300 |
| O | -2.15990300 | -2.95628300 | -0.89337700 |
| C | -3.04071800 | -1.94714600 | -0.91939100 |
| C | -4.31344500 | -2.19441900 | -0.37825100 |
| C | -2.72825200 | -0.68592500 | -1.45418800 |
| C | -5.26129900 | -1.18966200 | -0.34999700 |
| H | -4.52717000 | -3.17797000 | 0.02426000  |
| C | -3.67771300 | 0.31988700  | -1.42211700 |
| H | -1.73920700 | -0.48527400 | -1.86195500 |
| C | -4.93074700 | 0.06086500  | -0.87051100 |
| H | -6.24424100 | -1.35451800 | 0.07350100  |
| H | -3.45495100 | 1.30761300  | -1.80634400 |
| N | -5.90421000 | 1.13149900  | -0.79896000 |
| O | -5.59179200 | 2.23186000  | -1.23551700 |
| O | -6.99153000 | 0.89644000  | -0.28970800 |

**26**

|   |             |             |             |
|---|-------------|-------------|-------------|
| C | -0.97828400 | -0.92391900 | -1.37830500 |
| C | -2.12113400 | -1.18442500 | -2.31440900 |
| C | -3.21071900 | -2.25251600 | -0.54053200 |
| C | -2.29950300 | -1.75960300 | 0.58801600  |
| C | 0.10257100  | -0.92783300 | 0.52266500  |
| H | -2.22718200 | -0.35079400 | -3.00963100 |
| H | -4.21470900 | -2.41313200 | -0.14430300 |
| H | -2.02587000 | -2.61287900 | 1.21206900  |
| N | 0.18705600  | -0.41393000 | -1.65484300 |
| N | 0.84350600  | -0.42210600 | -0.45710900 |
| N | -1.06338000 | -1.27262200 | -0.05498100 |
| H | -2.82962400 | -3.20492600 | -0.93468400 |
| H | -1.91404400 | -2.10089400 | -2.88494500 |
| O | -3.32051900 | -1.30383500 | -1.58572300 |
| C | -2.89199500 | -0.66107600 | 1.49162400  |
| H | -3.85783900 | -1.03133300 | 1.85018400  |

|   |             |             |             |
|---|-------------|-------------|-------------|
| H | -2.23447600 | -0.57379300 | 2.36272200  |
| C | -3.03980300 | 0.69010300  | 0.83323100  |
| C | -4.19468300 | 1.03337800  | 0.12501300  |
| C | -1.99588900 | 1.61635000  | 0.92040600  |
| C | -4.30061100 | 2.27351800  | -0.49707600 |
| H | -5.01116200 | 0.31950200  | 0.05361400  |
| C | -2.10003200 | 2.85808500  | 0.29411800  |
| H | -1.10585700 | 1.36012300  | 1.49683400  |
| C | -3.25098700 | 3.18812100  | -0.41700400 |
| H | -5.20294700 | 2.52832600  | -1.04386200 |
| H | -1.28531500 | 3.57203800  | 0.37294000  |
| H | -3.33549400 | 4.15629200  | -0.90034400 |
| C | 2.22073800  | -0.01493200 | -0.37699200 |
| C | 3.19884900  | -1.00630200 | -0.48136600 |
| C | 2.51081400  | 1.34106300  | -0.23086500 |
| C | 4.52940900  | -0.59361100 | -0.44371000 |
| C | 3.85655700  | 1.70347800  | -0.20266500 |
| C | 4.87421500  | 0.75297700  | -0.30664200 |
| H | 5.31411900  | -1.34117400 | -0.52829700 |
| H | 4.11427800  | 2.75367500  | -0.09159900 |
| C | 2.81915900  | -2.45718000 | -0.61522100 |
| H | 2.33070000  | -2.80974200 | 0.30017000  |
| H | 2.12014600  | -2.60895000 | -1.44346500 |
| H | 3.70331600  | -3.07100800 | -0.79222000 |
| C | 6.32128700  | 1.16730000  | -0.24157900 |
| H | 6.70241000  | 1.06966800  | 0.78004700  |
| H | 6.94096800  | 0.53826400  | -0.88470900 |
| H | 6.44843200  | 2.20850900  | -0.54524100 |
| C | 1.40468600  | 2.34261700  | -0.05866400 |
| H | 0.65960200  | 2.26146100  | -0.85615400 |
| H | 0.90066500  | 2.13334300  | 0.89145700  |
| H | 1.79745100  | 3.36060200  | -0.04736300 |
| C | 0.47342100  | -0.93090000 | 1.99546500  |
| O | 0.74741300  | 0.22735400  | 2.44249900  |
| C | 0.43280000  | -2.16236600 | 2.57977000  |
| H | 0.67639600  | -2.28002700 | 3.62930900  |
| H | 0.18539900  | -3.04464900 | 2.00013500  |

**27**

|   |             |             |             |
|---|-------------|-------------|-------------|
| C | -1.06195600 | -0.79277500 | -1.22738500 |
| C | -2.21884600 | -1.01994700 | -2.15931400 |
| C | -3.08728600 | -2.38296500 | -0.44310800 |
| C | -2.32776900 | -1.71601800 | 0.70372700  |
| C | 0.11932500  | -0.89937300 | 0.59466000  |

|   |             |             |             |
|---|-------------|-------------|-------------|
| H | -2.46454500 | -0.08220700 | -2.66298700 |
| H | -4.04674100 | -2.74454500 | -0.07188300 |
| H | -2.01413700 | -2.47773500 | 1.41882100  |
| N | 0.11579800  | -0.32009300 | -1.54952900 |
| N | 0.83624700  | -0.39765000 | -0.40994200 |
| N | -1.09827900 | -1.16258000 | 0.08447600  |
| H | -2.51194400 | -3.23451800 | -0.83128300 |
| H | -1.90318500 | -1.75656500 | -2.91050800 |
| O | -3.36626800 | -1.45097300 | -1.46987400 |
| C | -3.10987900 | -0.60555300 | 1.44090600  |
| H | -4.11417900 | -1.00048100 | 1.62243200  |
| H | -2.63272700 | -0.46522600 | 2.41323700  |
| C | -3.18184900 | 0.72255000  | 0.72213200  |
| C | -4.22240800 | 1.02314800  | -0.16109500 |
| C | -2.18859600 | 1.68268500  | 0.93856100  |
| C | -4.25590800 | 2.24330100  | -0.82962600 |
| H | -5.00184000 | 0.28746200  | -0.33302600 |
| C | -2.21671400 | 2.90530700  | 0.26945700  |
| H | -1.39835800 | 1.48046100  | 1.65964600  |
| C | -3.24927000 | 3.18523500  | -0.62175400 |
| H | -5.07142100 | 2.46100900  | -1.51172100 |
| H | -1.44140300 | 3.64245700  | 0.45506300  |
| H | -3.27671900 | 4.13657800  | -1.14284900 |
| C | 2.21486800  | 0.03000500  | -0.40203000 |
| C | 3.17087500  | -0.86156900 | -0.90071700 |
| C | 2.51418500  | 1.29788400  | 0.09349100  |
| C | 4.49750600  | -0.44601300 | -0.85480100 |
| C | 3.86101400  | 1.66324300  | 0.11376200  |
| C | 4.85994800  | 0.80597800  | -0.34690100 |
| H | 5.26888200  | -1.11595200 | -1.22530600 |
| H | 4.13037900  | 2.64362000  | 0.49673400  |
| C | 2.77688700  | -2.20680400 | -1.44978100 |
| H | 2.25354900  | -2.81047100 | -0.70045100 |
| H | 2.10726700  | -2.09907600 | -2.30778600 |
| H | 3.66081300  | -2.75920800 | -1.76897900 |
| C | 6.30806500  | 1.21662700  | -0.31970700 |
| H | 6.91515100  | 0.45928400  | 0.18303900  |
| H | 6.69564300  | 1.32289400  | -1.33702300 |
| H | 6.44165000  | 2.16793200  | 0.19743900  |
| C | 1.44133700  | 2.22053600  | 0.60675800  |
| H | 0.55486300  | 2.19954000  | -0.03311200 |
| H | 1.13132600  | 1.94617300  | 1.62239100  |
| H | 1.81209500  | 3.24539900  | 0.64750900  |
| C | 0.52619500  | -1.17619000 | 2.02643600  |



|   |             |             |            |
|---|-------------|-------------|------------|
| O | -0.37835100 | -1.36098900 | 2.80673200 |
| C | 1.97722000  | -1.23281500 | 2.38975200 |
| H | 2.42448200  | -0.23492900 | 2.34675400 |
| H | 2.04813100  | -1.62026300 | 3.40497400 |
| H | 2.53188700  | -1.87253000 | 1.69844100 |

**28-ts**

|   |             |             |             |
|---|-------------|-------------|-------------|
| C | 2.46982900  | -0.85255800 | 1.64974300  |
| C | 3.42467900  | -1.58792900 | 2.54579400  |
| C | 3.59057200  | -3.16047700 | 0.83209800  |
| C | 3.08491500  | -2.27660100 | -0.30548900 |
| C | 1.35966800  | -0.37673200 | -0.16805700 |
| H | 4.01865100  | -0.87054500 | 3.11468000  |
| H | 4.28443300  | -3.89938100 | 0.43060900  |
| H | 2.39389100  | -2.84373700 | -0.92714900 |
| N | 1.68386700  | 0.13458500  | 1.98030900  |
| N | 0.99840400  | 0.41511200  | 0.84399600  |
| N | 2.29243700  | -1.20562000 | 0.34298400  |
| H | 2.75611300  | -3.68322300 | 1.31834800  |
| H | 2.84589800  | -2.20463200 | 3.24667100  |
| O | 4.30181600  | -2.37950300 | 1.77896600  |
| C | 4.22788000  | -1.69772500 | -1.18677200 |
| H | 5.14041800  | -2.24775700 | -0.93573700 |
| H | 3.98186600  | -1.91738300 | -2.22581500 |
| C | 4.50023200  | -0.21667900 | -1.05057700 |
| C | 5.12771900  | 0.29663900  | 0.09082200  |
| C | 4.16266000  | 0.66065800  | -2.08418100 |
| C | 5.42060200  | 1.65437500  | 0.18989800  |
| H | 5.40781500  | -0.38397800 | 0.89148300  |
| C | 4.46985200  | 2.01784200  | -1.99353600 |
| H | 3.66680900  | 0.27064500  | -2.96854800 |
| C | 5.09903500  | 2.51823400  | -0.85684000 |
| H | 5.91263700  | 2.03592800  | 1.07902400  |
| H | 4.21294200  | 2.68346500  | -2.81185400 |
| H | 5.33615800  | 3.57489300  | -0.78453600 |
| C | 0.01394700  | 1.46647700  | 0.88532500  |
| C | -1.21431500 | 1.18614700  | 1.48765400  |
| C | 0.35165100  | 2.70941600  | 0.34888600  |
| C | -2.14426900 | 2.22279300  | 1.52778600  |
| C | -0.62102100 | 3.70686600  | 0.40318800  |
| C | -1.87007100 | 3.48043700  | 0.98424600  |
| H | -3.11174500 | 2.04227400  | 1.99174800  |
| H | -0.39560000 | 4.68217800  | -0.01947000 |
| C | -1.51406100 | -0.16138900 | 2.08619600  |

|   |             |             |             |
|---|-------------|-------------|-------------|
| H | -1.07266600 | -0.97074500 | 1.49789500  |
| H | -1.10871200 | -0.23296200 | 3.10034200  |
| H | -2.59342700 | -0.32534000 | 2.13741400  |
| C | -2.91091500 | 4.56712900  | 1.03926400  |
| H | -3.87201300 | 4.20035600  | 0.66809400  |
| H | -3.06434600 | 4.90157400  | 2.06968800  |
| H | -2.61545100 | 5.43104800  | 0.44169600  |
| C | 1.68645700  | 2.92935200  | -0.30599100 |
| H | 2.50803400  | 2.54096100  | 0.30407700  |
| H | 1.73384500  | 2.41506400  | -1.27334200 |
| H | 1.86067800  | 3.99150900  | -0.48419500 |
| C | 0.87991700  | -0.44108400 | -1.62032600 |
| O | 1.55460400  | -1.17919500 | -2.33513400 |
| C | -0.33894300 | 0.22126000  | -1.97051200 |
| H | -0.55251200 | 1.16073600  | -1.46727800 |
| H | -0.47098600 | 0.26392500  | -3.05087800 |
| H | -1.31936900 | -0.58175400 | -1.51050600 |
| C | -6.25115400 | 0.90500100  | -0.71591600 |
| C | -6.09955400 | -0.00710400 | 0.50245500  |
| C | -5.81420200 | -1.46153400 | 0.13943500  |
| C | -5.19018600 | 0.61314400  | -1.77636500 |
| C | -3.80316000 | 0.40681600  | -1.15936900 |
| C | -3.48727700 | -1.01663900 | -0.73622500 |
| H | -6.17471600 | 1.94954000  | -0.39402200 |
| H | -7.01900600 | 0.01456900  | 1.09418600  |
| H | -6.11056600 | -2.09191600 | 0.98057800  |
| H | -5.46436800 | -0.27604800 | -2.35571200 |
| H | -3.66650200 | 1.07298700  | -0.29871100 |
| C | -4.06873600 | -3.20982100 | 0.10612700  |
| H | -4.31546300 | -3.78713400 | -0.79440900 |
| C | -2.59768600 | -3.36393000 | 0.45582900  |
| H | -2.34878200 | -4.42134900 | 0.56817300  |
| C | -1.77124800 | -2.72967100 | -0.65123600 |
| H | -1.76304400 | -3.37262900 | -1.53945600 |
| N | -2.27951200 | -1.41708000 | -1.01756900 |
| N | -4.40097000 | -1.79584200 | -0.10941700 |
| H | -3.02855800 | 0.67642300  | -1.87881400 |
| H | -5.14177400 | 1.43908200  | -2.49074400 |
| H | -7.24784100 | 0.77784400  | -1.15129100 |
| H | -5.30191900 | 0.34742200  | 1.16530200  |
| H | -6.42582300 | -1.77061700 | -0.71974100 |
| H | -4.69549100 | -3.57917700 | 0.91988600  |
| H | -2.40424500 | -2.86688300 | 1.41131900  |
| H | -0.72307700 | -2.61001600 | -0.34189700 |

26<sup>DBU</sup>

|   |             |             |             |
|---|-------------|-------------|-------------|
| C | -2.29540000 | -0.48912000 | -1.54167100 |
| C | -3.25826000 | -1.27570500 | -2.38180700 |
| C | -2.86662600 | -3.08532100 | -0.95593000 |
| C | -2.17623700 | -2.31418500 | 0.17048400  |
| C | -0.92273600 | -0.08933400 | 0.11427300  |
| H | -4.05332300 | -0.61996700 | -2.73850300 |
| H | -3.37944500 | -3.95108500 | -0.53387400 |
| H | -1.27114600 | -2.84174100 | 0.47032600  |
| N | -1.83287000 | 0.70523400  | -1.77270100 |
| N | -0.97692700 | 0.93997400  | -0.73613800 |
| N | -1.74463100 | -1.02278300 | -0.40818400 |
| H | -2.11502200 | -3.43843100 | -1.67636700 |
| H | -2.71892800 | -1.68583500 | -3.24739700 |
| O | -3.84338000 | -2.30229300 | -1.61804300 |
| C | -3.02432000 | -2.06008300 | 1.43088700  |
| H | -3.42157500 | -3.02957100 | 1.74791500  |
| H | -2.33272100 | -1.72339100 | 2.20967100  |
| C | -4.13724900 | -1.05332300 | 1.26098500  |
| C | -5.39949100 | -1.43514500 | 0.79705800  |
| C | -3.91124800 | 0.29339600  | 1.56082500  |
| C | -6.40749800 | -0.49200900 | 0.62382500  |
| H | -5.58917400 | -2.47932800 | 0.56454100  |
| C | -4.91807800 | 1.24212600  | 1.38577500  |
| H | -2.94131600 | 0.59248000  | 1.95691700  |
| C | -6.16797600 | 0.85094800  | 0.91379400  |
| H | -7.38270600 | -0.80489500 | 0.26481900  |
| H | -4.72964500 | 2.28327800  | 1.62959200  |
| H | -6.95503500 | 1.58600400  | 0.78089300  |
| C | -0.20950100 | 2.15823500  | -0.72711200 |
| C | 1.10893900  | 2.10652100  | -1.18421800 |
| C | -0.82717100 | 3.33058200  | -0.28988500 |
| C | 1.83532200  | 3.29517400  | -1.16888300 |
| C | -0.06097400 | 4.49520100  | -0.30262000 |
| C | 1.26701100  | 4.49522800  | -0.73425300 |
| H | 2.86693000  | 3.28424300  | -1.51118000 |
| H | -0.51276100 | 5.42304600  | 0.03810700  |
| C | 1.70757300  | 0.81392200  | -1.66799900 |
| H | 1.72543300  | 0.06837400  | -0.86592400 |
| H | 1.12076700  | 0.39146600  | -2.49056500 |
| H | 2.73062800  | 0.96733700  | -2.01575600 |
| C | 2.06441300  | 5.77282500  | -0.76084400 |
| H | 3.12474600  | 5.57952200  | -0.58509400 |

|   |             |             |             |
|---|-------------|-------------|-------------|
| H | 1.97391900  | 6.25932700  | -1.73721900 |
| H | 1.70771100  | 6.47608600  | -0.00565300 |
| C | -2.24440000 | 3.31894100  | 0.21613500  |
| H | -2.91473900 | 2.79959900  | -0.47403100 |
| H | -2.30308200 | 2.79950900  | 1.17984100  |
| H | -2.60912100 | 4.33668800  | 0.36058200  |
| C | -0.13725200 | -0.26787000 | 1.38134900  |
| O | 0.18252100  | -1.49986200 | 1.63819300  |
| C | 0.10954300  | 0.84052600  | 2.11982800  |
| H | -0.22099400 | 1.82525500  | 1.81840800  |
| H | 0.64422600  | 0.73898600  | 3.05734400  |
| H | 1.40333300  | -1.96503300 | 0.77623600  |
| C | 5.59041400  | 0.38283000  | 2.02243600  |
| C | 5.74712600  | 0.30372700  | 0.50330100  |
| C | 5.79319800  | -1.12587700 | -0.02821600 |
| C | 4.55267400  | -0.61476500 | 2.53593200  |
| C | 3.30053100  | -0.65508600 | 1.65689300  |
| C | 3.37712200  | -1.57376400 | 0.45597100  |
| H | 5.29494600  | 1.40014400  | 2.29913000  |
| H | 6.67453800  | 0.79826300  | 0.20221800  |
| H | 6.28812500  | -1.12343700 | -1.00021800 |
| H | 4.98411000  | -1.62036500 | 2.59435500  |
| H | 3.03990300  | 0.35054900  | 1.29926800  |
| C | 4.45363900  | -2.76497200 | -1.34535100 |
| H | 4.67681000  | -3.74817500 | -0.91579400 |
| C | 3.10058200  | -2.76941900 | -2.03885000 |
| H | 3.08290800  | -3.53891400 | -2.81216100 |
| C | 2.02357600  | -3.03533800 | -1.00344900 |
| H | 2.02901600  | -4.08565800 | -0.69490500 |
| N | 2.24668300  | -2.19057800 | 0.16567000  |
| N | 4.47789400  | -1.75479200 | -0.27267000 |
| H | 2.43510300  | -0.99811700 | 2.22810400  |
| H | 4.25373500  | -0.35260200 | 3.55373400  |
| H | 6.55337900  | 0.18717000  | 2.50478700  |
| H | 4.93719800  | 0.83831400  | -0.00573500 |
| H | 6.38433500  | -1.77312000 | 0.63120000  |
| H | 5.24646800  | -2.51668300 | -2.05073100 |
| H | 2.93708400  | -1.79957700 | -2.51886500 |
| H | 1.02774900  | -2.80505000 | -1.39303600 |

**29-ts-r**

|   |             |             |             |
|---|-------------|-------------|-------------|
| C | -1.51507200 | -2.21421400 | -1.45884400 |
| C | -1.26745500 | -3.56319800 | -2.06449700 |
| C | -0.07341900 | -4.07600200 | -0.13655100 |

|   |             |             |             |
|---|-------------|-------------|-------------|
| C | -0.60321000 | -2.94382300 | 0.74229500  |
| C | -1.41092300 | -0.60808200 | 0.02141900  |
| H | -2.13209000 | -3.87040900 | -2.65476100 |
| H | 0.18494400  | -4.92602900 | 0.49772300  |
| H | 0.23759100  | -2.48356400 | 1.25979400  |
| N | -1.99173900 | -1.17104100 | -2.07011100 |
| N | -1.92223800 | -0.17573300 | -1.14037500 |
| N | -1.15084600 | -1.91860700 | -0.17687400 |
| H | 0.82515800  | -3.73269600 | -0.66421600 |
| H | -0.39110300 | -3.47388800 | -2.72258600 |
| O | -1.04928800 | -4.52634000 | -1.06357700 |
| C | -1.66290600 | -3.36142900 | 1.78195800  |
| H | -1.30280900 | -4.28192300 | 2.25317000  |
| H | -1.67326800 | -2.58057100 | 2.54635100  |
| C | -3.06167200 | -3.55180000 | 1.24545600  |
| C | -3.48601600 | -4.76749400 | 0.70101800  |
| C | -3.96595900 | -2.48723900 | 1.28966300  |
| C | -4.77863500 | -4.91073600 | 0.20494800  |
| H | -2.79298600 | -5.60236700 | 0.66049400  |
| C | -5.26207700 | -2.62605700 | 0.79545500  |
| H | -3.65119800 | -1.54442900 | 1.73521700  |
| C | -5.67020500 | -3.83946000 | 0.24827300  |
| H | -5.09379500 | -5.86204400 | -0.21231400 |
| H | -5.95267400 | -1.78938200 | 0.84658400  |
| H | -6.67871700 | -3.95363300 | -0.13583400 |
| C | -2.38216200 | 1.13090400  | -1.53660000 |
| C | -1.52706500 | 1.93332200  | -2.29458900 |
| C | -3.69807700 | 1.49504400  | -1.22915100 |
| C | -2.01182300 | 3.18170500  | -2.69330600 |
| C | -4.12727200 | 2.75456200  | -1.63734300 |
| C | -3.29475000 | 3.61454100  | -2.35975400 |
| H | -1.36548900 | 3.82810600  | -3.28164600 |
| H | -5.14031300 | 3.06720400  | -1.39688700 |
| C | -0.15506500 | 1.46103200  | -2.68899800 |
| H | 0.37200300  | 2.24749400  | -3.23295300 |
| H | 0.43354400  | 1.16616200  | -1.81429200 |
| H | -0.22141700 | 0.57468700  | -3.32752300 |
| C | -3.78286200 | 4.98060600  | -2.76487900 |
| H | -3.84635300 | 5.63847500  | -1.89242800 |
| H | -3.10997300 | 5.44327600  | -3.48913400 |
| H | -4.78237000 | 4.92499800  | -3.20390700 |
| C | -4.60060300 | 0.56039400  | -0.47230300 |
| H | -4.58980300 | -0.44084800 | -0.91281600 |
| H | -4.27265100 | 0.46307200  | 0.56939600  |

|   |             |             |             |
|---|-------------|-------------|-------------|
| H | -5.62676800 | 0.93102400  | -0.47335900 |
| C | -1.20262200 | 0.08939400  | 1.34428800  |
| O | -0.47870500 | -0.52099400 | 2.17696300  |
| C | -1.73971000 | 1.35123300  | 1.53631300  |
| H | -1.71073600 | 1.73742800  | 2.54752900  |
| H | -2.37723200 | 1.85345400  | 0.82393700  |
| C | 1.84670200  | 0.65600600  | 1.30533700  |
| C | 1.20605700  | 1.80252700  | 1.85319100  |
| C | 0.27559400  | 2.53239700  | 1.14981500  |
| H | 1.44335600  | 2.04048500  | 2.88403500  |
| H | 0.16928800  | 2.31323800  | 0.09037800  |
| C | -0.28195500 | 3.82942500  | 1.57742100  |
| C | -0.98748400 | 4.59378600  | 0.63868400  |
| C | -0.14010900 | 4.32783900  | 2.87966500  |
| C | -1.52689400 | 5.82825200  | 0.98352500  |
| H | -1.11561000 | 4.20436700  | -0.36899200 |
| C | -0.68274700 | 5.56035600  | 3.22541300  |
| H | 0.39118300  | 3.75121200  | 3.63028000  |
| C | -1.37557600 | 6.31627800  | 2.27995900  |
| H | -2.06483300 | 6.40923400  | 0.24112500  |
| H | -0.56471100 | 5.93438300  | 4.23733000  |
| H | -1.79628300 | 7.27821400  | 2.55450200  |
| C | 2.82914000  | -0.02147500 | 2.20972500  |
| C | 4.19083300  | 0.02248500  | 1.90189100  |
| C | 2.40418300  | -0.60485200 | 3.40502000  |
| C | 5.12092700  | -0.54023300 | 2.77110400  |
| H | 4.52291700  | 0.50848100  | 0.98907800  |
| C | 3.33768400  | -1.17537500 | 4.26647400  |
| H | 1.34149600  | -0.62002700 | 3.62453500  |
| C | 4.69521200  | -1.14685900 | 3.95141600  |
| H | 6.17801400  | -0.50099700 | 2.52745100  |
| H | 3.00442500  | -1.64234800 | 5.18806500  |
| H | 5.42002700  | -1.58909400 | 4.62742200  |
| N | 1.62633600  | 0.34349100  | 0.03615400  |
| S | 2.17411000  | -1.02991700 | -0.66484800 |
| O | 1.20938300  | -1.33034600 | -1.73271700 |
| O | 2.47205800  | -2.12374200 | 0.27056500  |
| C | 3.69694800  | -0.57534200 | -1.46571200 |
| C | 3.68007900  | 0.43312500  | -2.42784200 |
| C | 4.87334100  | -1.23537900 | -1.13130700 |
| C | 4.86801000  | 0.78440300  | -3.05426300 |
| H | 2.75000200  | 0.93650700  | -2.67549800 |
| C | 6.05492100  | -0.87225000 | -1.77221700 |
| H | 4.85617000  | -2.00956000 | -0.37119400 |

|   |            |             |             |
|---|------------|-------------|-------------|
| C | 6.06955700 | 0.13675500  | -2.73821900 |
| H | 4.86786900 | 1.57350800  | -3.80096200 |
| H | 6.98005400 | -1.38008100 | -1.51561000 |
| C | 7.34440200 | 0.51001500  | -3.44746400 |
| H | 8.22107200 | 0.19896700  | -2.87597400 |
| H | 7.39376100 | 0.02422300  | -4.42730900 |
| H | 7.40079000 | 1.58841900  | -3.61339300 |

**29-ts-s**

|   |             |             |             |
|---|-------------|-------------|-------------|
| C | 0.37205300  | -2.33319700 | 1.09805300  |
| C | -0.65819000 | -3.31453300 | 1.58617400  |
| C | -1.64367100 | -3.01761300 | -0.52666400 |
| C | -0.37307100 | -2.60111200 | -1.25585300 |
| C | 1.43215500  | -1.03644100 | -0.31003500 |
| H | -0.16768800 | -4.10023500 | 2.16524500  |
| H | -2.31349000 | -3.52730800 | -1.22054600 |
| H | -0.60723000 | -1.82174000 | -1.97912200 |
| N | 1.20493200  | -1.65344700 | 1.83405300  |
| N | 1.85683800  | -0.84970600 | 0.94807000  |
| N | 0.47658600  | -1.98233000 | -0.21644400 |
| H | -2.16147900 | -2.13091100 | -0.13365200 |
| H | -1.35768500 | -2.77702800 | 2.24267400  |
| O | -1.33852800 | -3.92764600 | 0.51722800  |
| C | 0.34617600  | -3.78743300 | -1.94498300 |
| H | -0.42811600 | -4.48578600 | -2.27807200 |
| H | 0.84836000  | -3.38354300 | -2.82351700 |
| C | 1.36270300  | -4.50883600 | -1.09016200 |
| C | 1.01921200  | -5.61269300 | -0.30389800 |
| C | 2.68795800  | -4.06032000 | -1.07661200 |
| C | 1.97583900  | -6.25042900 | 0.48269400  |
| H | -0.00800700 | -5.96405900 | -0.30317000 |
| C | 3.64834300  | -4.70260100 | -0.29681000 |
| H | 2.95657800  | -3.20442100 | -1.69387500 |
| C | 3.29335300  | -5.79674900 | 0.48928600  |
| H | 1.69290900  | -7.10735500 | 1.08602200  |
| H | 4.67628700  | -4.35224500 | -0.30817900 |
| H | 4.04048700  | -6.29697800 | 1.09701000  |
| C | 2.82809900  | 0.08300200  | 1.45919200  |
| C | 2.36494300  | 1.13106100  | 2.26095600  |
| C | 4.18064700  | -0.10867000 | 1.15848000  |
| C | 3.30974100  | 2.05655300  | 2.70737500  |
| C | 5.08056200  | 0.84333900  | 1.63223000  |
| C | 4.66272100  | 1.94066000  | 2.38831700  |
| H | 2.97455100  | 2.88765100  | 3.32306700  |

|   |             |             |             |
|---|-------------|-------------|-------------|
| H | 6.13655900  | 0.72141100  | 1.40525700  |
| C | 0.92329400  | 1.24954300  | 2.67733500  |
| H | 0.67737600  | 2.28760000  | 2.91432400  |
| H | 0.24039600  | 0.90445900  | 1.89924100  |
| H | 0.73407800  | 0.64236400  | 3.56807700  |
| C | 5.65285000  | 2.98130400  | 2.84046500  |
| H | 6.63218600  | 2.53689600  | 3.03134800  |
| H | 5.78227600  | 3.74474500  | 2.06635900  |
| H | 5.31333500  | 3.48309800  | 3.74888600  |
| C | 4.64673900  | -1.28017200 | 0.34003100  |
| H | 4.13102000  | -2.19832500 | 0.63361300  |
| H | 4.44527700  | -1.11007300 | -0.72370700 |
| H | 5.72058800  | -1.42848200 | 0.46517300  |
| C | 1.88969100  | -0.45379900 | -1.63756500 |
| O | 1.59929000  | -1.16327800 | -2.63358100 |
| C | 2.52593400  | 0.77452800  | -1.61102400 |
| H | 2.92656000  | 1.14704700  | -2.54664400 |
| H | 2.87202700  | 1.22657700  | -0.69460100 |
| C | -1.21589300 | 1.50281400  | -0.40294600 |
| C | -0.02947600 | 2.28662600  | -0.42373600 |
| C | 0.75054400  | 2.42214700  | -1.55176000 |
| H | 0.20297500  | 2.85727400  | 0.46884300  |
| H | 0.38216800  | 1.97471900  | -2.47159900 |
| C | 1.76003500  | 3.48699100  | -1.67768800 |
| C | 2.02432800  | 4.03413300  | -2.93871600 |
| C | 2.45783400  | 3.97812100  | -0.56480900 |
| C | 2.94463600  | 5.06832400  | -3.08236700 |
| H | 1.49786300  | 3.64802800  | -3.80737600 |
| C | 3.38374200  | 5.00323000  | -0.71068700 |
| H | 2.29685200  | 3.53105100  | 0.41344400  |
| C | 3.62553400  | 5.55608100  | -1.96936900 |
| H | 3.13231900  | 5.49038800  | -4.06428500 |
| H | 3.92339400  | 5.36853300  | 0.15743000  |
| H | 4.34951300  | 6.35640100  | -2.08186300 |
| C | -2.09878000 | 1.69659000  | 0.78410300  |
| C | -2.43148200 | 2.98361000  | 1.21650500  |
| C | -2.55169500 | 0.58926800  | 1.50833700  |
| C | -3.24530700 | 3.15705100  | 2.33236600  |
| H | -2.07718200 | 3.84452400  | 0.65719300  |
| C | -3.35584000 | 0.76282500  | 2.62750700  |
| H | -2.26393900 | -0.40788700 | 1.18684200  |
| C | -3.71159100 | 2.04852300  | 3.03542300  |
| H | -3.51868100 | 4.15793200  | 2.64965200  |
| H | -3.70717400 | -0.10324500 | 3.17936400  |



|   |             |             |             |
|---|-------------|-------------|-------------|
| H | -4.34659300 | 2.18457700  | 3.90527900  |
| N | -1.43792700 | 0.62542400  | -1.37091300 |
| S | -2.86687700 | 0.26617900  | -2.08333400 |
| O | -2.74774700 | -1.11440900 | -2.56629600 |
| O | -3.11753800 | 1.31303300  | -3.08135900 |
| C | -4.26023700 | 0.29480000  | -0.97690800 |
| C | -4.74041600 | -0.90002400 | -0.45331900 |
| C | -4.82420400 | 1.51815100  | -0.61792500 |
| C | -5.76737900 | -0.86200000 | 0.48586600  |
| H | -4.31924600 | -1.84279500 | -0.78470300 |
| C | -5.83718900 | 1.53935600  | 0.32859400  |
| H | -4.45619500 | 2.43821500  | -1.06049100 |
| C | -6.30883200 | 0.35371400  | 0.90760300  |
| H | -6.14722700 | -1.79061900 | 0.90172200  |
| H | -6.26446400 | 2.49001400  | 0.63554400  |
| C | -7.35825500 | 0.40588600  | 1.98438600  |
| H | -6.90986300 | 0.74148900  | 2.92607700  |
| H | -8.15156900 | 1.11339400  | 1.73049100  |
| H | -7.80583600 | -0.57506700 | 2.15462300  |

**30-r**

|   |             |             |             |
|---|-------------|-------------|-------------|
| C | -2.04812700 | -1.71948200 | -1.78779700 |
| C | -2.08673000 | -2.92103000 | -2.68363100 |
| C | -1.11516700 | -4.10496900 | -0.93238000 |
| C | -1.44980800 | -3.12366200 | 0.19119000  |
| C | -1.66893000 | -0.58478200 | 0.02446900  |
| H | -2.96837300 | -2.88359300 | -3.32533900 |
| H | -1.06318600 | -5.11364800 | -0.52012400 |
| H | -0.56018200 | -2.96373700 | 0.80574600  |
| N | -2.23418000 | -0.47339700 | -2.12605200 |
| N | -1.99121900 | 0.22294400  | -0.98644000 |
| N | -1.71991600 | -1.83101100 | -0.47041900 |
| H | -0.15371800 | -3.84693000 | -1.38871900 |
| H | -1.17925000 | -2.90231400 | -3.30159500 |
| O | -2.14976300 | -4.09727600 | -1.90937700 |
| C | -2.64843100 | -3.59158300 | 1.06815100  |
| H | -2.84535400 | -4.63757500 | 0.81114100  |
| H | -2.32883300 | -3.56596800 | 2.11031200  |
| C | -3.94127500 | -2.81687600 | 0.93564600  |
| C | -4.70300600 | -2.88117200 | -0.23830200 |
| C | -4.42796900 | -2.06574200 | 2.00808400  |
| C | -5.92164300 | -2.21442900 | -0.33240800 |
| H | -4.34293500 | -3.48272700 | -1.06970500 |
| C | -5.65421500 | -1.40709300 | 1.92068400  |

|   |             |             |             |
|---|-------------|-------------|-------------|
| H | -3.84312500 | -2.00704600 | 2.92177200  |
| C | -6.40403600 | -1.47884100 | 0.74996700  |
| H | -6.50139800 | -2.27850000 | -1.24792900 |
| H | -6.02007500 | -0.83647300 | 2.76882300  |
| H | -7.35756900 | -0.96526900 | 0.67897900  |
| C | -2.18582900 | 1.65079400  | -0.98368200 |
| C | -3.32006600 | 2.15557000  | -0.33692700 |
| C | -1.25116400 | 2.45340400  | -1.63840800 |
| C | -3.46554300 | 3.53930400  | -0.30159400 |
| C | -1.44620300 | 3.83388200  | -1.57214000 |
| C | -2.53242700 | 4.39137100  | -0.90141400 |
| H | -4.32635500 | 3.96337000  | 0.20924100  |
| H | -0.71037900 | 4.48666600  | -2.03556100 |
| C | -4.31379200 | 1.23675300  | 0.32185800  |
| H | -4.50921300 | 0.34527400  | -0.28295200 |
| H | -3.96106100 | 0.88652900  | 1.30016700  |
| H | -5.26139900 | 1.75212900  | 0.48731900  |
| C | -2.71146800 | 5.88496800  | -0.83780700 |
| H | -3.39080900 | 6.22651800  | -1.62558600 |
| H | -3.13811900 | 6.18696100  | 0.12186200  |
| H | -1.75512600 | 6.39596400  | -0.96653400 |
| C | -0.07983700 | 1.87669300  | -2.38716400 |
| H | 0.17043000  | 0.86117200  | -2.06391600 |
| H | -0.30414600 | 1.83140700  | -3.45784900 |
| H | 0.79257700  | 2.52411700  | -2.25857800 |
| C | -1.33117000 | -0.26450000 | 1.46929700  |
| O | -1.42622000 | -1.17644800 | 2.25873500  |
| C | -0.96134500 | 1.14046000  | 1.85534700  |
| H | -0.87519300 | 1.14681800  | 2.94469100  |
| H | -1.79145400 | 1.79386400  | 1.57050000  |
| C | 1.93382900  | -0.27670700 | 1.31570700  |
| C | 1.54809000  | 0.93561300  | 1.77419400  |
| C | 0.34555900  | 1.62596500  | 1.18828900  |
| H | 2.06943500  | 1.40312300  | 2.60410700  |
| H | 0.30617000  | 1.30372700  | 0.14091600  |
| C | 0.48010300  | 3.13774400  | 1.15999200  |
| C | 1.52675600  | 3.67660900  | 0.40024900  |
| C | -0.40595000 | 4.01525900  | 1.78395400  |
| C | 1.66119400  | 5.04968700  | 0.23434600  |
| H | 2.23710300  | 2.99696400  | -0.06800900 |
| C | -0.27043300 | 5.39551800  | 1.62679400  |
| H | -1.22109500 | 3.63774800  | 2.39376500  |
| C | 0.75374500  | 5.91744800  | 0.84423700  |
| H | 2.47133800  | 5.44462900  | -0.37099900 |

|   |             |             |             |
|---|-------------|-------------|-------------|
| H | -0.97578200 | 6.06195400  | 2.11419800  |
| H | 0.85097800  | 6.99073300  | 0.71430400  |
| C | 3.15566200  | -0.93213700 | 1.86531800  |
| C | 4.31959300  | -0.18718000 | 2.08662700  |
| C | 3.15902200  | -2.29879700 | 2.16670500  |
| C | 5.46039600  | -0.79183900 | 2.60609600  |
| H | 4.32854500  | 0.86577100  | 1.81906500  |
| C | 4.29894000  | -2.90274400 | 2.68913900  |
| H | 2.26504000  | -2.88212000 | 1.97352000  |
| C | 5.45312900  | -2.15257100 | 2.90898600  |
| H | 6.35987500  | -0.20444500 | 2.76329100  |
| H | 4.28771800  | -3.96254400 | 2.92465100  |
| H | 6.34403100  | -2.62658700 | 3.30879900  |
| N | 1.12086600  | -0.90475000 | 0.36921300  |
| S | 1.71585100  | -1.74048600 | -0.83944700 |
| O | 0.80180800  | -1.55583700 | -1.99543900 |
| O | 1.98899700  | -3.16727800 | -0.55141600 |
| C | 3.29046800  | -1.00781200 | -1.26648300 |
| C | 3.34809100  | 0.36304700  | -1.51135600 |
| C | 4.43878800  | -1.78768400 | -1.30613600 |
| C | 4.57156900  | 0.95236500  | -1.80218800 |
| H | 2.44007000  | 0.95848300  | -1.46477700 |
| C | 5.65919100  | -1.18500700 | -1.60224500 |
| H | 4.36859600  | -2.84896200 | -1.09306600 |
| C | 5.74465200  | 0.18747200  | -1.84786100 |
| H | 4.62199400  | 2.02073400  | -1.99543900 |
| H | 6.56133900  | -1.78947300 | -1.63604400 |
| C | 7.07205400  | 0.84213900  | -2.12914600 |
| H | 7.80045900  | 0.11687200  | -2.49763500 |
| H | 6.96975700  | 1.63890200  | -2.86973100 |
| H | 7.48001000  | 1.29092800  | -1.21761400 |

**30-s**

|   |             |            |             |
|---|-------------|------------|-------------|
| C | -0.53325900 | 2.44305300 | 1.03823100  |
| C | 0.37015600  | 3.54571900 | 1.51760900  |
| C | 1.45573200  | 3.29886200 | -0.56851700 |
| C | 0.26216900  | 2.70308000 | -1.30442600 |
| C | -1.31501600 | 0.93882900 | -0.31763800 |
| H | -0.21715200 | 4.29744300 | 2.04967500  |
| H | 2.05831300  | 3.88369700 | -1.26498900 |
| H | 0.62440900  | 1.92853600 | -1.98253800 |
| N | -1.31222100 | 1.69253700 | 1.77460200  |
| N | -1.79402400 | 0.76025800 | 0.91605000  |
| N | -0.52878700 | 2.02386000 | -0.25668200 |

|   |             |             |             |
|---|-------------|-------------|-------------|
| H | 2.07397200  | 2.48911500  | -0.15653800 |
| H | 1.09335900  | 3.10165100  | 2.21655900  |
| O | 1.02479000  | 4.18844600  | 0.44985800  |
| C | -0.59346800 | 3.75050500  | -2.05761200 |
| H | 0.10182600  | 4.48304700  | -2.47888500 |
| H | -1.07816100 | 3.23810200  | -2.89020700 |
| C | -1.65088700 | 4.44386800  | -1.22964800 |
| C | -1.39069600 | 5.62401200  | -0.52737500 |
| C | -2.93203200 | 3.88856800  | -1.15420100 |
| C | -2.38190200 | 6.22247500  | 0.24696100  |
| H | -0.40116700 | 6.06676900  | -0.58102600 |
| C | -3.92618600 | 4.48371100  | -0.37992200 |
| H | -3.15111700 | 2.98782600  | -1.72538900 |
| C | -3.65071900 | 5.65178100  | 0.32730600  |
| H | -2.16321500 | 7.13915100  | 0.78544200  |
| H | -4.91753700 | 4.04218600  | -0.33767700 |
| H | -4.42279600 | 6.11932900  | 0.92963500  |
| C | -2.71967100 | -0.24091600 | 1.38688300  |
| C | -2.27979800 | -1.14834100 | 2.35634800  |
| C | -4.01691000 | -0.25749900 | 0.85802000  |
| C | -3.17011400 | -2.15565600 | 2.73164800  |
| C | -4.86208900 | -1.28487700 | 1.26994500  |
| C | -4.45018300 | -2.25417800 | 2.18720000  |
| H | -2.84572000 | -2.88267900 | 3.47175700  |
| H | -5.86958900 | -1.32580000 | 0.86466400  |
| C | -0.93413100 | -1.04764500 | 3.01827300  |
| H | -0.57856800 | -2.03872200 | 3.30918000  |
| H | -0.18683400 | -0.59417900 | 2.36938000  |
| H | -1.00832800 | -0.43330700 | 3.92118300  |
| C | -5.36369500 | -3.38960400 | 2.56424200  |
| H | -6.40982000 | -3.07648100 | 2.54958600  |
| H | -5.25450100 | -4.21291400 | 1.85039600  |
| H | -5.12644300 | -3.77632600 | 3.55720700  |
| C | -4.49283700 | 0.77277200  | -0.13122600 |
| H | -4.12225300 | 1.76901700  | 0.12301300  |
| H | -4.17037500 | 0.54020800  | -1.15379800 |
| H | -5.58322300 | 0.80426300  | -0.14103000 |
| C | -1.57990600 | 0.18022100  | -1.60160800 |
| O | -1.52634900 | 0.83920400  | -2.61714900 |
| C | -1.94556700 | -1.27763300 | -1.58416000 |
| H | -2.43331200 | -1.46540600 | -2.54437400 |
| H | -2.66154100 | -1.48486200 | -0.78620800 |
| C | 1.05740000  | -1.21893900 | -0.02258500 |
| C | 0.04206400  | -2.09713100 | -0.15585000 |

|   |             |             |             |
|---|-------------|-------------|-------------|
| C | -0.73570000 | -2.24393200 | -1.44113900 |
| H | -0.20208900 | -2.76723800 | 0.66596000  |
| H | -0.05262700 | -2.02294700 | -2.26691300 |
| C | -1.25495000 | -3.66134400 | -1.59857500 |
| C | -0.84662700 | -4.45168000 | -2.67303500 |
| C | -2.15918800 | -4.19514800 | -0.67317400 |
| C | -1.33271500 | -5.74953100 | -2.82621800 |
| H | -0.13980300 | -4.04628200 | -3.39228400 |
| C | -2.64682100 | -5.48959900 | -0.82362400 |
| H | -2.48144900 | -3.59405200 | 0.17684000  |
| C | -2.23539400 | -6.27088400 | -1.90318000 |
| H | -1.00612900 | -6.35181500 | -3.66816400 |
| H | -3.34839900 | -5.88982100 | -0.09821900 |
| H | -2.61692600 | -7.27980200 | -2.02218200 |
| C | 1.91677200  | -1.23012000 | 1.19892000  |
| C | 2.22373900  | -2.42598600 | 1.85769800  |
| C | 2.43336500  | -0.03442800 | 1.70997000  |
| C | 3.01404600  | -2.42303100 | 3.00402200  |
| H | 1.86164000  | -3.36550800 | 1.45037700  |
| C | 3.22433600  | -0.02762200 | 2.85319400  |
| H | 2.21120800  | 0.88922500  | 1.18575800  |
| C | 3.51781500  | -1.22447900 | 3.50629800  |
| H | 3.24932200  | -3.36082400 | 3.49785300  |
| H | 3.61760800  | 0.91124500  | 3.23181200  |
| H | 4.14007800  | -1.22338800 | 4.39565000  |
| N | 1.23831300  | -0.19179000 | -0.96986300 |
| S | 2.43113000  | -0.31415000 | -2.00431200 |
| O | 2.39528400  | 0.88877700  | -2.86304900 |
| O | 2.46598700  | -1.61181700 | -2.71442300 |
| C | 3.97679600  | -0.23209300 | -1.10604200 |
| C | 4.55083300  | 1.00617400  | -0.83848300 |
| C | 4.50873700  | -1.39327200 | -0.54928600 |
| C | 5.64723700  | 1.08271700  | 0.01608300  |
| H | 4.14200800  | 1.89762500  | -1.30382500 |
| C | 5.59982200  | -1.30376400 | 0.30581200  |
| H | 4.05639300  | -2.35366000 | -0.77604200 |
| C | 6.17298000  | -0.06522400 | 0.61463100  |
| H | 6.09855400  | 2.04875200  | 0.22571500  |
| H | 6.00876400  | -2.20686000 | 0.75145200  |
| C | 7.31149900  | 0.02260300  | 1.59667100  |
| H | 6.93713300  | -0.09112500 | 2.61986100  |
| H | 8.04455500  | -0.77030900 | 1.42777700  |
| H | 7.82093300  | 0.98622800  | 1.53122500  |

**31-ts-r**

|   |             |             |             |
|---|-------------|-------------|-------------|
| C | -1.39212500 | -3.04629300 | -1.61423500 |
| C | -1.41028100 | -4.47663700 | -2.07352100 |
| C | 0.52360700  | -4.72654000 | -0.80269600 |
| C | 0.31326400  | -3.53453000 | 0.12446900  |
| C | -0.77646100 | -1.28750300 | -0.47161000 |
| H | -2.44234100 | -4.82612400 | -2.14091200 |
| H | 1.09836000  | -5.49365300 | -0.28229900 |
| H | 1.25618900  | -3.00757400 | 0.24486500  |
| N | -2.08158700 | -2.06435900 | -2.11831800 |
| N | -1.68995000 | -0.97931200 | -1.39557800 |
| N | -0.58613000 | -2.61578400 | -0.60198900 |
| H | 1.07206500  | -4.41540900 | -1.70270300 |
| H | -0.95153500 | -4.53261700 | -3.07013200 |
| O | -0.72582300 | -5.29927800 | -1.15729400 |
| C | -0.26681100 | -3.93995700 | 1.50897300  |
| H | -0.18637600 | -5.02873900 | 1.59342200  |
| H | 0.37109000  | -3.49623000 | 2.27339400  |
| C | -1.70131500 | -3.54024100 | 1.77713400  |
| C | -2.76251500 | -4.24362700 | 1.19530500  |
| C | -1.99216400 | -2.47582500 | 2.63576100  |
| C | -4.08299100 | -3.90552800 | 1.48365800  |
| H | -2.54052200 | -5.07310300 | 0.52759900  |
| C | -3.31317100 | -2.14005200 | 2.93044200  |
| H | -1.17121200 | -1.91254300 | 3.07006000  |
| C | -4.36205800 | -2.85774300 | 2.36026700  |
| H | -4.89422200 | -4.46600600 | 1.02953200  |
| H | -3.52115800 | -1.31567200 | 3.60665300  |
| H | -5.39069900 | -2.59750200 | 2.58959100  |
| C | -2.35045100 | 0.27009800  | -1.66148300 |
| C | -3.51869100 | 0.55600000  | -0.94466400 |
| C | -1.82110200 | 1.12126600  | -2.63331400 |
| C | -4.10442800 | 1.80195200  | -1.15312600 |
| C | -2.45898900 | 2.35022300  | -2.81349400 |
| C | -3.58088600 | 2.71596700  | -2.06972600 |
| H | -4.98481700 | 2.07056300  | -0.57334000 |
| H | -2.05462800 | 3.04340500  | -3.54743600 |
| C | -4.14365500 | -0.42420700 | 0.01314700  |
| H | -3.49547300 | -1.27230500 | 0.24548100  |
| H | -4.39999100 | 0.07170600  | 0.95471300  |
| H | -5.06995600 | -0.82564400 | -0.40998600 |
| C | -4.23404400 | 4.05852600  | -2.26515900 |
| H | -5.06607400 | 3.98429000  | -2.97282700 |
| H | -4.62988100 | 4.43615800  | -1.31941700 |

|   |             |             |             |
|---|-------------|-------------|-------------|
| H | -3.52321500 | 4.78801500  | -2.65964900 |
| C | -0.59648400 | 0.78163300  | -3.43690500 |
| H | -0.30332400 | -0.26439800 | -3.33150000 |
| H | -0.77776300 | 0.98966500  | -4.49468600 |
| H | 0.25326800  | 1.38751900  | -3.11217100 |
| C | -0.10927000 | -0.45058500 | 0.65500700  |
| O | 0.56831800  | -1.14924800 | 1.43646000  |
| C | -1.02638000 | 0.61614800  | 1.27694100  |
| H | -0.69210800 | 0.66544400  | 2.31825100  |
| H | -2.03676200 | 0.19104600  | 1.28763600  |
| C | 1.37392400  | 1.87684700  | 0.21508700  |
| C | 0.37206800  | 2.57499000  | 0.77039400  |
| C | -1.02714000 | 2.02964100  | 0.68665600  |
| H | 0.58250400  | 3.48147400  | 1.32801600  |
| H | -1.27465600 | 1.95852700  | -0.37686300 |
| C | -2.06753500 | 2.94468900  | 1.30196000  |
| C | -2.25795700 | 4.20535700  | 0.72098800  |
| C | -2.86979800 | 2.58709700  | 2.38657700  |
| C | -3.22405700 | 5.08048700  | 1.20260500  |
| H | -1.64738700 | 4.48706300  | -0.13483500 |
| C | -3.84454500 | 3.46214300  | 2.87135000  |
| H | -2.74912200 | 1.61922800  | 2.86430100  |
| C | -4.02727700 | 4.70824000  | 2.28216600  |
| H | -3.35844300 | 6.04973100  | 0.73160900  |
| H | -4.46050700 | 3.16363700  | 3.71400900  |
| H | -4.78623100 | 5.38640800  | 2.65868900  |
| C | 2.78706700  | 2.35285200  | 0.36012100  |
| C | 3.52002600  | 2.00974800  | 1.50059500  |
| C | 3.37885400  | 3.15698200  | -0.61529400 |
| C | 4.83392900  | 2.44040800  | 1.65033300  |
| H | 3.05661300  | 1.38031600  | 2.25546000  |
| C | 4.69064300  | 3.60064300  | -0.45985400 |
| H | 2.81046500  | 3.41984600  | -1.50157800 |
| C | 5.42142900  | 3.23803200  | 0.66885000  |
| H | 5.39991700  | 2.15433700  | 2.53172800  |
| H | 5.14247800  | 4.22731800  | -1.22253100 |
| H | 6.44646600  | 3.57635200  | 0.78463600  |
| N | 1.04529700  | 0.65348600  | -0.41839900 |
| S | 2.14568000  | -0.06472000 | -1.38183400 |
| O | 2.54200800  | 0.83327500  | -2.47468500 |
| O | 1.56854300  | -1.36479200 | -1.76328100 |
| C | 3.64712000  | -0.42357500 | -0.47754700 |
| C | 4.85651200  | 0.05461800  | -0.96715000 |
| C | 3.58672200  | -1.17605200 | 0.69247100  |

|   |            |             |             |
|---|------------|-------------|-------------|
| C | 6.02558700 | -0.22490700 | -0.26680000 |
| H | 4.86844900 | 0.65620900  | -1.86886300 |
| C | 4.76537500 | -1.44551300 | 1.37793300  |
| H | 2.62351700 | -1.49650200 | 1.08151100  |
| C | 5.99782200 | -0.97147900 | 0.91367100  |
| H | 6.97437600 | 0.15337000  | -0.63768900 |
| H | 4.73046100 | -2.02600400 | 2.29592500  |
| C | 7.26064700 | -1.22474300 | 1.69437200  |
| H | 7.21116700 | -2.17521500 | 2.23060100  |
| H | 8.13541600 | -1.23848700 | 1.04060500  |
| H | 7.41484000 | -0.43454800 | 2.43694900  |

**31-ts-s**

|   |             |             |             |
|---|-------------|-------------|-------------|
| C | 1.30678000  | -2.25763400 | 1.71341000  |
| C | 1.10618600  | -3.53958400 | 2.47088000  |
| C | -0.12282600 | -4.27724500 | 0.61790400  |
| C | 0.43651000  | -3.27913300 | -0.39449900 |
| C | 1.12282600  | -0.85756900 | 0.04700400  |
| H | 2.00040800  | -3.77468600 | 3.05075800  |
| H | -0.39176100 | -5.20062000 | 0.10376200  |
| H | -0.37119800 | -2.89072200 | -1.02139400 |
| N | 1.74085800  | -1.12307200 | 2.18283200  |
| N | 1.62277300  | -0.25948900 | 1.13101300  |
| N | 0.93224800  | -2.14106300 | 0.40556700  |
| H | -1.02083600 | -3.88158300 | 1.11326200  |
| H | 0.26243500  | -3.40363500 | 3.16281200  |
| O | 0.86272600  | -4.60853100 | 1.58529300  |
| C | 1.54563600  | -3.90321500 | -1.29124000 |
| H | 1.46576500  | -4.99113400 | -1.18921200 |
| H | 1.30423600  | -3.64563600 | -2.32201100 |
| C | 2.97979100  | -3.50233700 | -1.01957300 |
| C | 3.64663100  | -3.91620700 | 0.14027700  |
| C | 3.69052000  | -2.76363000 | -1.96926300 |
| C | 4.98723900  | -3.59723200 | 0.34426100  |
| H | 3.11391100  | -4.51996000 | 0.87032400  |
| C | 5.03742800  | -2.46073700 | -1.77728700 |
| H | 3.17571300  | -2.42491200 | -2.86258500 |
| C | 5.68938800  | -2.87252200 | -0.61774100 |
| H | 5.48805700  | -3.92948700 | 1.24841800  |
| H | 5.57471700  | -1.89546400 | -2.53288000 |
| H | 6.73687300  | -2.63316700 | -0.46391600 |
| C | 2.17019300  | 1.06680700  | 1.27184400  |
| C | 3.38733600  | 1.32795200  | 0.63133600  |
| C | 1.51923200  | 1.99556900  | 2.08700800  |



|   |             |             |             |
|---|-------------|-------------|-------------|
| C | 3.90630300  | 2.61528900  | 0.74625500  |
| C | 2.07834800  | 3.27207700  | 2.15982500  |
| C | 3.25546500  | 3.60305100  | 1.48891800  |
| H | 4.83942600  | 2.85159900  | 0.24140100  |
| H | 1.57885500  | 4.02533300  | 2.76478900  |
| C | 4.09189200  | 0.25718000  | -0.15876200 |
| H | 5.11292800  | 0.56281500  | -0.39337900 |
| H | 4.13625400  | -0.68748600 | 0.39467000  |
| H | 3.58594400  | 0.03972700  | -1.10749900 |
| C | 3.82577300  | 4.99260700  | 1.59586400  |
| H | 4.60347500  | 5.15848100  | 0.84757900  |
| H | 3.04333700  | 5.74180900  | 1.45096400  |
| H | 4.26556200  | 5.15465500  | 2.58505100  |
| C | 0.31768000  | 1.63776200  | 2.91957300  |
| H | -0.25152900 | 0.80969700  | 2.49660500  |
| H | 0.64215700  | 1.34272700  | 3.92273600  |
| H | -0.34757400 | 2.49847800  | 3.02324100  |
| C | 0.78404300  | -0.36324700 | -1.37808200 |
| O | 1.06654300  | -1.19381200 | -2.25311700 |
| C | 0.94534700  | 1.12617600  | -1.68603100 |
| H | 1.12973100  | 1.14915000  | -2.76282600 |
| H | 1.87033200  | 1.43383800  | -1.19881900 |
| C | -1.50536200 | 0.53277400  | 0.01340700  |
| C | -0.96749500 | 1.75391500  | -0.11905100 |
| C | -0.15907900 | 2.14370900  | -1.33212500 |
| H | -1.12969700 | 2.49396500  | 0.65909400  |
| H | -0.85765100 | 2.12475300  | -2.17924400 |
| C | 0.36450300  | 3.57253000  | -1.21759500 |
| C | 1.66774200  | 3.94739200  | -1.55352700 |
| C | -0.51000600 | 4.57569500  | -0.77596700 |
| C | 2.09364600  | 5.26885400  | -1.41599200 |
| H | 2.37640300  | 3.21560400  | -1.92574500 |
| C | -0.09054800 | 5.89369400  | -0.63707900 |
| H | -1.53914600 | 4.31986100  | -0.53678500 |
| C | 1.22180800  | 6.24669400  | -0.94957300 |
| H | 3.11683800  | 5.52791500  | -1.67198600 |
| H | -0.78954400 | 6.64607800  | -0.28520600 |
| H | 1.55697800  | 7.27289800  | -0.83720600 |
| C | -2.36501900 | 0.15771300  | 1.16809200  |
| C | -3.29906600 | 1.05324200  | 1.69801400  |
| C | -2.25200100 | -1.11439200 | 1.73911300  |
| C | -4.09884800 | 0.68151800  | 2.77612400  |
| H | -3.42212700 | 2.02994200  | 1.23874200  |
| C | -3.03977400 | -1.48345100 | 2.82320000  |

|   |             |             |             |
|---|-------------|-------------|-------------|
| H | -1.54537200 | -1.81251900 | 1.30233500  |
| C | -3.97175300 | -0.58538800 | 3.34286000  |
| H | -4.83113000 | 1.38064700  | 3.16824800  |
| H | -2.93236200 | -2.47290400 | 3.25768300  |
| H | -4.59761900 | -0.87267800 | 4.18159800  |
| N | -1.13281500 | -0.50662000 | -0.87712100 |
| S | -2.07064900 | -0.78779200 | -2.16830800 |
| O | -1.87222500 | -2.19014000 | -2.56828100 |
| O | -1.90456100 | 0.21624800  | -3.23567400 |
| C | -3.72630600 | -0.60023300 | -1.54243200 |
| C | -4.27754400 | -1.62061100 | -0.77146900 |
| C | -4.38294600 | 0.61354900  | -1.70799500 |
| C | -5.50117100 | -1.41027300 | -0.14982700 |
| H | -3.74145200 | -2.55689100 | -0.64853900 |
| C | -5.61100800 | 0.80755000  | -1.08206000 |
| H | -3.92852900 | 1.39174100  | -2.31261500 |
| C | -6.17646000 | -0.19128200 | -0.28507900 |
| H | -5.93546200 | -2.19585500 | 0.46245900  |
| H | -6.13103700 | 1.75353200  | -1.20334700 |
| C | -7.46560700 | 0.04691800  | 0.45508300  |
| H | -8.02394800 | 0.88114400  | 0.02573000  |
| H | -8.10051000 | -0.84228900 | 0.44267600  |
| H | -7.25537100 | 0.28574600  | 1.50335600  |

**32-r**

|   |             |            |             |
|---|-------------|------------|-------------|
| C | -1.42565900 | 3.05537000 | 1.54240100  |
| C | -1.47559100 | 4.50123900 | 1.94986400  |
| C | 0.58438500  | 4.67342600 | 0.86847600  |
| C | 0.40825800  | 3.48214300 | -0.06621500 |
| C | -0.71309600 | 1.24354000 | 0.53698000  |
| H | -2.50218700 | 4.86619000 | 1.87638300  |
| H | 1.22721800  | 5.41625900 | 0.39412200  |
| H | 1.34595400  | 2.93953500 | -0.14221700 |
| N | -2.14507700 | 2.09627200 | 2.04563700  |
| N | -1.69312200 | 0.97880400 | 1.40745500  |
| N | -0.54346000 | 2.58044100 | 0.61520200  |
| H | 1.04434700  | 4.35266000 | 1.81408000  |
| H | -1.14724800 | 4.57708700 | 2.99548100  |
| O | -0.66918900 | 5.29417100 | 1.11089800  |
| C | -0.09329300 | 3.89955300 | -1.47575000 |
| H | 0.07492800  | 4.97643900 | -1.58111700 |
| H | 0.52816400  | 3.38185900 | -2.20567200 |
| C | -1.54496900 | 3.59721100 | -1.77349200 |
| C | -2.56981300 | 4.43250400 | -1.31616700 |

|   |             |             |             |
|---|-------------|-------------|-------------|
| C | -1.88282200 | 2.46785700  | -2.52672700 |
| C | -3.90210400 | 4.15130000  | -1.61488800 |
| H | -2.31278500 | 5.31257600  | -0.73173900 |
| C | -3.21384000 | 2.19247900  | -2.83578300 |
| H | -1.08639400 | 1.80460600  | -2.85231300 |
| C | -4.22786400 | 3.03342100  | -2.38151100 |
| H | -4.68516400 | 4.81230200  | -1.25632900 |
| H | -3.45992200 | 1.31579300  | -3.42866000 |
| H | -5.26494000 | 2.81724000  | -2.61870000 |
| C | -2.36969400 | -0.25769100 | 1.68706500  |
| C | -3.54539500 | -0.53237700 | 0.97513900  |
| C | -1.85290100 | -1.10967200 | 2.66322400  |
| C | -4.15044200 | -1.76551700 | 1.19643100  |
| C | -2.51045800 | -2.32749500 | 2.85769900  |
| C | -3.63997000 | -2.68061800 | 2.12153500  |
| H | -5.03865700 | -2.02425200 | 0.62370900  |
| H | -2.11744600 | -3.01845200 | 3.59954200  |
| C | -4.15620700 | 0.44855700  | 0.00838100  |
| H | -3.50616700 | 1.29891300  | -0.20718400 |
| H | -4.39129600 | -0.04603300 | -0.93941300 |
| H | -5.09230300 | 0.84348300  | 0.41539200  |
| C | -4.31706000 | -4.01074100 | 2.31998900  |
| H | -5.30559800 | -3.88008000 | 2.77052900  |
| H | -4.45689200 | -4.51268000 | 1.35800700  |
| H | -3.72918600 | -4.66248000 | 2.96920600  |
| C | -0.62160000 | -0.78255800 | 3.46172600  |
| H | -0.33122700 | 0.26595700  | 3.37142000  |
| H | -0.79323100 | -1.00770700 | 4.51742800  |
| H | 0.22579800  | -1.38401400 | 3.12223300  |
| C | 0.04169300  | 0.33806300  | -0.52004800 |
| O | 0.68857400  | 1.08174500  | -1.34685300 |
| C | -0.99661600 | -0.61415000 | -1.20016300 |
| H | -0.64433400 | -0.66328800 | -2.23569400 |
| H | -1.96561000 | -0.10444600 | -1.21800800 |
| C | 1.29693900  | -1.91474700 | -0.22803200 |
| C | 0.27561400  | -2.62728500 | -0.71249700 |
| C | -1.10693900 | -2.03790100 | -0.65117000 |
| H | 0.46421400  | -3.56727400 | -1.22056100 |
| H | -1.38436800 | -1.99274100 | 0.40695900  |
| C | -2.15743900 | -2.89608700 | -1.32638400 |
| C | -2.40133200 | -4.17054500 | -0.79859100 |
| C | -2.91502500 | -2.47418200 | -2.41949900 |
| C | -3.37344400 | -5.00039900 | -1.34380800 |
| H | -1.82603300 | -4.50120000 | 0.06438000  |

|   |             |             |             |
|---|-------------|-------------|-------------|
| C | -3.89736200 | -3.30279300 | -2.96675100 |
| H | -2.74950600 | -1.49243400 | -2.85349200 |
| C | -4.13070200 | -4.56554000 | -2.43303100 |
| H | -3.54629300 | -5.98349200 | -0.91600100 |
| H | -4.47940700 | -2.95583100 | -3.81504000 |
| H | -4.89438800 | -5.20813000 | -2.85915600 |
| C | 2.70516200  | -2.38824100 | -0.39969000 |
| C | 3.43580500  | -1.97789300 | -1.51969300 |
| C | 3.28945200  | -3.26196800 | 0.51733800  |
| C | 4.74254300  | -2.41521800 | -1.70480000 |
| H | 2.97560400  | -1.29479300 | -2.22851100 |
| C | 4.59552900  | -3.70924000 | 0.32689700  |
| H | 2.72091600  | -3.57241400 | 1.38803600  |
| C | 5.32471700  | -3.28191800 | -0.77953300 |
| H | 5.30731300  | -2.08168300 | -2.57008800 |
| H | 5.04298800  | -4.38881800 | 1.04533600  |
| H | 6.34497200  | -3.62400800 | -0.92301400 |
| N | 0.99840500  | -0.63847200 | 0.35559700  |
| S | 2.13870000  | 0.02560300  | 1.36323600  |
| O | 2.46398800  | -0.96879800 | 2.38580400  |
| O | 1.59318900  | 1.31475300  | 1.80073100  |
| C | 3.66087500  | 0.36279700  | 0.49239000  |
| C | 4.83946500  | -0.17031300 | 1.00254700  |
| C | 3.65223100  | 1.15671600  | -0.65144800 |
| C | 6.03533600  | 0.10044400  | 0.34662900  |
| H | 4.81072900  | -0.80167300 | 1.88320200  |
| C | 4.85910300  | 1.41220200  | -1.29158100 |
| H | 2.70195300  | 1.49787800  | -1.05655100 |
| C | 6.06297900  | 0.88730400  | -0.80779400 |
| H | 6.96174400  | -0.31705000 | 0.73140400  |
| H | 4.86755900  | 2.02117300  | -2.19139500 |
| C | 7.35596300  | 1.12808600  | -1.54115000 |
| H | 7.33662300  | 2.07949100  | -2.07722700 |
| H | 8.20613700  | 1.13061600  | -0.85554500 |
| H | 7.52800800  | 0.33623900  | -2.27799400 |

**32-s**

|   |            |             |             |
|---|------------|-------------|-------------|
| C | 3.19289000 | 0.88318500  | 0.73034300  |
| C | 4.60406700 | 0.70678100  | 1.22148400  |
| C | 4.16595700 | -1.60074700 | 1.03212700  |
| C | 3.09172100 | -1.46091100 | -0.04608000 |
| C | 1.21635300 | 0.31072800  | -0.03214000 |
| H | 5.24947700 | 1.45429600  | 0.75453300  |
| H | 4.69877700 | -2.54272600 | 0.89649200  |

|   |             |             |             |
|---|-------------|-------------|-------------|
| H | 2.31939500  | -2.22381800 | 0.06684000  |
| N | 2.47433500  | 1.96273400  | 0.82975600  |
| N | 1.24704100  | 1.59215100  | 0.35126700  |
| N | 2.46426300  | -0.14821000 | 0.21112800  |
| H | 3.71888800  | -1.58642500 | 2.03700500  |
| H | 4.60235500  | 0.86749000  | 2.30837400  |
| O | 5.12271300  | -0.56360100 | 0.90283400  |
| C | 3.67552400  | -1.55361100 | -1.47787800 |
| H | 4.47562700  | -2.30045200 | -1.44509100 |
| H | 2.87051300  | -1.92578200 | -2.10952400 |
| C | 4.20217200  | -0.26038900 | -2.05846200 |
| C | 5.55506400  | 0.08357800  | -1.98321900 |
| C | 3.32039000  | 0.61200100  | -2.70710200 |
| C | 6.01828000  | 1.27534000  | -2.53545400 |
| H | 6.24462200  | -0.58572900 | -1.47741200 |
| C | 3.78432300  | 1.80190700  | -3.26587700 |
| H | 2.27068100  | 0.32828700  | -2.76927500 |
| C | 5.13339200  | 2.13919400  | -3.17827300 |
| H | 7.07243000  | 1.52649100  | -2.46946300 |
| H | 3.09199400  | 2.46354600  | -3.77888700 |
| H | 5.49475000  | 3.06569300  | -3.61322900 |
| C | 0.20500500  | 2.58992600  | 0.40012800  |
| C | -0.02747900 | 3.36325200  | -0.74360500 |
| C | -0.43521700 | 2.82293200  | 1.61831500  |
| C | -1.01789200 | 4.33669000  | -0.66777200 |
| C | -1.43319100 | 3.80042300  | 1.63528900  |
| C | -1.74451100 | 4.55530000  | 0.50656800  |
| H | -1.23554600 | 4.93515000  | -1.54903100 |
| H | -1.96717500 | 3.98273600  | 2.56503900  |
| C | 0.78333000  | 3.15292500  | -1.99392500 |
| H | 0.53782400  | 3.90830700  | -2.74198100 |
| H | 1.85335200  | 3.21507700  | -1.77274100 |
| H | 0.60855700  | 2.16535700  | -2.43776700 |
| C | -2.80128900 | 5.62624900  | 0.56458900  |
| H | -3.58518300 | 5.36349500  | 1.27851600  |
| H | -2.36424400 | 6.58064300  | 0.87698500  |
| H | -3.26508500 | 5.77031300  | -0.41376100 |
| C | -0.02353600 | 2.13283700  | 2.89116100  |
| H | 0.44772800  | 1.16483200  | 2.71559100  |
| H | 0.69336500  | 2.76012900  | 3.43133800  |
| H | -0.88594500 | 1.97724300  | 3.54462900  |
| C | 0.15906100  | -0.61364400 | -0.76398200 |
| O | 0.75084600  | -1.16480100 | -1.76923200 |
| C | -1.14927400 | 0.13328400  | -1.13353700 |

|   |             |             |             |
|---|-------------|-------------|-------------|
| H | -1.45409900 | -0.31928400 | -2.07997900 |
| H | -0.89635800 | 1.17002200  | -1.34762700 |
| C | -0.84611900 | -1.03066400 | 1.54159800  |
| C | -1.80467400 | -0.13074000 | 1.27805100  |
| C | -2.31374000 | 0.08297700  | -0.12583600 |
| H | -2.21659400 | 0.45893200  | 2.09012600  |
| H | -2.89612900 | -0.81881200 | -0.37223300 |
| C | -3.28556600 | 1.25058900  | -0.24927100 |
| C | -3.32835900 | 2.05718000  | -1.38898900 |
| C | -4.21669400 | 1.50354700  | 0.76648300  |
| C | -4.24508100 | 3.10183800  | -1.49791000 |
| H | -2.63908100 | 1.88371300  | -2.20913500 |
| C | -5.13175200 | 2.54641400  | 0.66375800  |
| H | -4.23960100 | 0.87263900  | 1.65057100  |
| C | -5.14641700 | 3.35651900  | -0.47025000 |
| H | -4.24727500 | 3.71989900  | -2.39087200 |
| H | -5.83803600 | 2.72272300  | 1.46920100  |
| H | -5.85492200 | 4.17493100  | -0.55107400 |
| C | -0.33006600 | -1.31121600 | 2.90321300  |
| C | -1.11164600 | -1.06127200 | 4.03804400  |
| C | 0.97241000  | -1.78911000 | 3.08036000  |
| C | -0.58615600 | -1.24265900 | 5.31298100  |
| H | -2.14079600 | -0.73438800 | 3.92363600  |
| C | 1.49862400  | -1.97240200 | 4.35528000  |
| H | 1.56344500  | -2.02421200 | 2.20212300  |
| C | 0.72380600  | -1.69103000 | 5.47810300  |
| H | -1.20542700 | -1.04167100 | 6.18138200  |
| H | 2.51340600  | -2.34076900 | 4.47152800  |
| H | 1.13154100  | -1.83337900 | 6.47348100  |
| N | -0.15147000 | -1.61372300 | 0.43456200  |
| S | -0.44022900 | -3.21529600 | 0.09662000  |
| O | -0.88942600 | -3.82249500 | 1.34935800  |
| O | 0.73490400  | -3.78033200 | -0.55839700 |
| C | -1.81194400 | -3.29482600 | -1.03402000 |
| C | -3.06905700 | -3.61142200 | -0.52481400 |
| C | -1.62055800 | -3.02525600 | -2.38799900 |
| C | -4.15642800 | -3.64412500 | -1.39173100 |
| H | -3.18399100 | -3.83384100 | 0.53041100  |
| C | -2.72096800 | -3.06551800 | -3.23608400 |
| H | -0.63341300 | -2.74586900 | -2.74166500 |
| C | -3.99985600 | -3.36839400 | -2.75354000 |
| H | -5.14056200 | -3.89407800 | -1.00603900 |
| H | -2.58675300 | -2.85866200 | -4.29414500 |
| C | -5.18615400 | -3.37608100 | -3.68082700 |

|   |             |             |             |
|---|-------------|-------------|-------------|
| H | -5.60663600 | -2.36934100 | -3.77161300 |
| H | -4.90126700 | -3.70551700 | -4.68246000 |
| H | -5.97489700 | -4.03274100 | -3.30801500 |

**33-ts-r**

|   |             |             |             |
|---|-------------|-------------|-------------|
| C | -1.88656400 | 2.98135400  | 1.63263000  |
| C | -2.04779800 | 4.41434600  | 2.05197400  |
| C | 0.02017700  | 4.77241900  | 1.03002400  |
| C | -0.00914000 | 3.54873400  | 0.12046700  |
| C | -0.93421600 | 1.22129100  | 0.65177600  |
| H | -3.09681000 | 4.70989300  | 1.98528400  |
| H | 0.60070400  | 5.56905000  | 0.56236700  |
| H | 0.97845200  | 3.09427000  | 0.08583600  |
| N | -2.57367600 | 1.96856100  | 2.06433600  |
| N | -1.96776100 | 0.90003900  | 1.44701600  |
| N | -0.89456300 | 2.57707700  | 0.77920100  |
| H | 0.47301100  | 4.52082700  | 1.99987000  |
| H | -1.72162900 | 4.51435400  | 3.09691100  |
| O | -1.29860300 | 5.26913600  | 1.21597000  |
| C | -0.47708900 | 3.91875100  | -1.31767500 |
| H | -0.51763400 | 5.01141700  | -1.38311100 |
| H | 0.28939300  | 3.57069000  | -2.01015900 |
| C | -1.81371900 | 3.37264300  | -1.76502700 |
| C | -3.01077700 | 3.92728100  | -1.29687700 |
| C | -1.87801200 | 2.33968300  | -2.70409200 |
| C | -4.24008300 | 3.47061500  | -1.76636300 |
| H | -2.96660000 | 4.74342600  | -0.57897700 |
| C | -3.10731000 | 1.88556900  | -3.18241100 |
| H | -0.95061600 | 1.89548100  | -3.05477600 |
| C | -4.29180700 | 2.45244500  | -2.71750800 |
| H | -5.15834600 | 3.91692600  | -1.39708200 |
| H | -3.13795300 | 1.09116800  | -3.92303900 |
| H | -5.24893800 | 2.10037000  | -3.08936600 |
| C | -2.55972800 | -0.39018600 | 1.64107500  |
| C | -3.64768600 | -0.74116600 | 0.83915300  |
| C | -2.02769400 | -1.24107900 | 2.61493500  |
| C | -4.19124500 | -2.01545300 | 1.01154000  |
| C | -2.60568800 | -2.50123700 | 2.75059700  |
| C | -3.68058400 | -2.90641600 | 1.95273200  |
| H | -5.00871000 | -2.32929800 | 0.36624400  |
| H | -2.20054300 | -3.18898500 | 3.48955500  |
| C | -4.21285700 | 0.21677300  | -0.17457300 |
| H | -3.44395000 | 0.86254800  | -0.60936800 |
| H | -4.70166500 | -0.32859500 | -0.98568500 |

|   |             |             |             |
|---|-------------|-------------|-------------|
| H | -4.95469100 | 0.87812300  | 0.28688700  |
| C | -4.25514900 | -4.29074100 | 2.10236500  |
| H | -5.03311700 | -4.47559600 | 1.35874200  |
| H | -3.47545200 | -5.04722000 | 1.97061900  |
| H | -4.68608800 | -4.43152400 | 3.09832400  |
| C | -0.83078700 | -0.83224600 | 3.42933900  |
| H | -0.89278600 | 0.21638100  | 3.73251400  |
| H | -0.74722300 | -1.45174000 | 4.32444700  |
| H | 0.09076700  | -0.95181700 | 2.84846400  |
| C | 0.36078100  | 0.31465200  | -0.74934400 |
| O | 0.84587200  | 1.27538100  | -1.34846800 |
| C | -0.67542400 | -0.59655500 | -1.41709500 |
| H | -0.31459800 | -0.75974700 | -2.44110100 |
| H | -1.60896000 | -0.03489900 | -1.48013600 |
| C | 1.55105600  | -1.84060400 | -0.26632500 |
| C | 0.52225500  | -2.58361800 | -0.67884600 |
| C | -0.84011400 | -1.94361900 | -0.71310600 |
| H | 0.69649900  | -3.57207700 | -1.09133900 |
| H | -1.11550500 | -1.73532000 | 0.32875400  |
| C | -1.93056300 | -2.82946200 | -1.27814500 |
| C | -2.09194000 | -4.11601600 | -0.75055000 |
| C | -2.83540700 | -2.38992800 | -2.24542600 |
| C | -3.13869400 | -4.93321300 | -1.16095400 |
| H | -1.40270600 | -4.46559900 | 0.01565900  |
| C | -3.88927500 | -3.20622900 | -2.65866700 |
| H | -2.73838400 | -1.39872100 | -2.67850200 |
| C | -4.04819900 | -4.47728300 | -2.11595100 |
| H | -3.25215300 | -5.92304100 | -0.72908400 |
| H | -4.58666500 | -2.84214300 | -3.40693400 |
| H | -4.87029500 | -5.11010700 | -2.43457900 |
| C | 2.96902300  | -2.28726300 | -0.38243100 |
| C | 3.74289500  | -1.82562900 | -1.45296000 |
| C | 3.52608800  | -3.17403300 | 0.53800400  |
| C | 5.06274400  | -2.23742600 | -1.59243700 |
| H | 3.30392900  | -1.12921500 | -2.16286700 |
| C | 4.84903600  | -3.59009500 | 0.39566700  |
| H | 2.92358900  | -3.51867100 | 1.37243300  |
| C | 5.61817500  | -3.12045600 | -0.66531200 |
| H | 5.65944500  | -1.87041400 | -2.42183000 |
| H | 5.27805200  | -4.27859600 | 1.11669300  |
| H | 6.64991200  | -3.44064700 | -0.77140900 |
| N | 1.26553700  | -0.49111800 | 0.14007900  |
| S | 2.26558100  | 0.23277000  | 1.26488200  |
| O | 2.50020000  | -0.76710000 | 2.30287700  |



|   |            |             |             |
|---|------------|-------------|-------------|
| O | 1.64955300 | 1.50322300  | 1.63192100  |
| C | 3.83601100 | 0.58500600  | 0.50939800  |
| C | 4.97927900 | 0.00368200  | 1.04560200  |
| C | 3.89176200 | 1.43866900  | -0.58982500 |
| C | 6.20667900 | 0.27693900  | 0.45265600  |
| H | 4.89916700 | -0.66930800 | 1.89196500  |
| C | 5.12854400 | 1.69193100  | -1.16969500 |
| H | 2.97534600 | 1.85556600  | -0.99794900 |
| C | 6.29833500 | 1.11251200  | -0.66372200 |
| H | 7.10728000 | -0.17817100 | 0.85516700  |
| H | 5.18890800 | 2.34722400  | -2.03403900 |
| C | 7.62508500 | 1.35225600  | -1.33391300 |
| H | 7.65228000 | 2.32818900  | -1.82339900 |
| H | 8.44646300 | 1.29726800  | -0.61626200 |
| H | 7.80432500 | 0.59134200  | -2.10090200 |

### 33-ts-s

|   |            |             |             |
|---|------------|-------------|-------------|
| C | 3.36358900 | 0.86718500  | 0.60526400  |
| C | 4.77591300 | 0.60498700  | 1.05041100  |
| C | 4.09665900 | -1.64625100 | 1.22307800  |
| C | 2.96344100 | -1.54215300 | 0.20526100  |
| C | 1.27634700 | 0.36957500  | 0.00999600  |
| H | 5.46961300 | 1.20894300  | 0.46116100  |
| H | 4.52438900 | -2.64974200 | 1.20586300  |
| H | 2.12841600 | -2.18678300 | 0.49152700  |
| N | 2.75820100 | 2.01654800  | 0.56918200  |
| N | 1.47588000 | 1.68350900  | 0.19637900  |
| N | 2.50253900 | -0.14865700 | 0.28024900  |
| H | 3.72902400 | -1.43215900 | 2.23810200  |
| H | 4.86447600 | 0.89343900  | 2.10704000  |
| O | 5.13729800 | -0.74847300 | 0.87331900  |
| C | 3.42434300 | -1.93446400 | -1.22507100 |
| H | 4.23026800 | -2.66797100 | -1.12027700 |
| H | 2.57839200 | -2.42532800 | -1.70695700 |
| C | 3.88141600 | -0.79045100 | -2.09952000 |
| C | 5.21646400 | -0.37611300 | -2.13864200 |
| C | 2.94738600 | -0.12735200 | -2.90206500 |
| C | 5.60994900 | 0.67739800  | -2.96078800 |
| H | 5.94609200 | -0.88039700 | -1.51218300 |
| C | 3.34232700 | 0.91843700  | -3.73436600 |
| H | 1.90811800 | -0.45157200 | -2.86747600 |
| C | 4.67384100 | 1.32712000  | -3.76319400 |
| H | 6.65073200 | 0.98594800  | -2.98039800 |
| H | 2.60817000 | 1.41551300  | -4.36198100 |

|   |             |             |             |
|---|-------------|-------------|-------------|
| H | 4.98093100  | 2.14315900  | -4.40956100 |
| C | 0.50032200  | 2.73687100  | 0.11754200  |
| C | 0.24866800  | 3.33171200  | -1.12331000 |
| C | -0.10940700 | 3.17500000  | 1.29628400  |
| C | -0.68909500 | 4.36077200  | -1.17143400 |
| C | -1.05274500 | 4.19851300  | 1.19410800  |
| C | -1.35576100 | 4.80091700  | -0.02672600 |
| H | -0.90694200 | 4.82794200  | -2.12902400 |
| H | -1.55213800 | 4.54175100  | 2.09769300  |
| C | 0.98578000  | 2.88252000  | -2.35547700 |
| H | 0.74329000  | 3.52312100  | -3.20533700 |
| H | 2.06785900  | 2.90649800  | -2.19424900 |
| H | 0.73677200  | 1.84981100  | -2.62453400 |
| C | -2.34487600 | 5.93436100  | -0.09814200 |
| H | -3.16947000 | 5.77660300  | 0.60123200  |
| H | -1.86275200 | 6.88372900  | 0.15854700  |
| H | -2.76351500 | 6.02642300  | -1.10260900 |
| C | 0.28288700  | 2.62113100  | 2.63910600  |
| H | 0.59925000  | 1.57852600  | 2.57724200  |
| H | 1.11734000  | 3.19753600  | 3.05293100  |
| H | -0.54971700 | 2.68510300  | 3.34437400  |
| C | -0.19484800 | -0.97697200 | -0.65085000 |
| O | 0.37029500  | -1.73416800 | -1.44280900 |
| C | -1.24840100 | 0.01417500  | -1.15747400 |
| H | -1.65576800 | -0.44353400 | -2.06524400 |
| H | -0.74666900 | 0.93663000  | -1.44551800 |
| C | -1.01844600 | -0.62826000 | 1.68093600  |
| C | -1.84557100 | 0.33417200  | 1.25283400  |
| C | -2.37779000 | 0.31625000  | -0.16118200 |
| H | -2.11871200 | 1.14368700  | 1.92209900  |
| H | -3.07575900 | -0.53535000 | -0.20827200 |
| C | -3.18616500 | 1.55434100  | -0.51944000 |
| C | -3.10601600 | 2.15158300  | -1.77862400 |
| C | -4.08875800 | 2.09028500  | 0.40818900  |
| C | -3.88863100 | 3.26077000  | -2.09818100 |
| H | -2.42479900 | 1.76156500  | -2.52809000 |
| C | -4.86855900 | 3.19853800  | 0.09521400  |
| H | -4.19344200 | 1.62948800  | 1.38693400  |
| C | -4.77039100 | 3.79107900  | -1.16296900 |
| H | -3.79975600 | 3.71197700  | -3.08190000 |
| H | -5.55769900 | 3.59745700  | 0.83322500  |
| H | -5.37420000 | 4.65895600  | -1.40894400 |
| C | -0.46961400 | -0.70799900 | 3.05257500  |
| C | -1.18894300 | -0.19262500 | 4.13674000  |

|   |             |             |             |
|---|-------------|-------------|-------------|
| C | 0.80016100  | -1.24919600 | 3.28199900  |
| C | -0.63185000 | -0.17908300 | 5.41084800  |
| H | -2.19260200 | 0.19182700  | 3.98093700  |
| C | 1.35543700  | -1.23932000 | 4.55759600  |
| H | 1.34732000  | -1.68194800 | 2.45018000  |
| C | 0.64529000  | -0.69532300 | 5.62576500  |
| H | -1.20092500 | 0.22613500  | 6.24148000  |
| H | 2.34369300  | -1.65963100 | 4.71724500  |
| H | 1.07696400  | -0.68678500 | 6.62120900  |
| N | -0.48123900 | -1.51432400 | 0.69871000  |
| S | -0.73334000 | -3.17057200 | 0.83291300  |
| O | -1.38881700 | -3.36294000 | 2.12274700  |
| O | 0.51532500  | -3.87544100 | 0.56908200  |
| C | -1.90458700 | -3.58189500 | -0.43606500 |
| C | -3.25695500 | -3.38834900 | -0.16401700 |
| C | -1.46956000 | -4.07486200 | -1.66269600 |
| C | -4.18821800 | -3.68702500 | -1.15173900 |
| H | -3.57181200 | -3.02309000 | 0.80862100  |
| C | -2.41751600 | -4.37452700 | -2.63361400 |
| H | -0.40944000 | -4.20870100 | -1.84271100 |
| C | -3.78313100 | -4.17924800 | -2.39703700 |
| H | -5.24563200 | -3.54459100 | -0.95022300 |
| H | -2.09294500 | -4.76566200 | -3.59347200 |
| C | -4.79373500 | -4.47659900 | -3.47246000 |
| H | -4.86322800 | -3.63739600 | -4.17200300 |
| H | -4.50798100 | -5.36036800 | -4.04734200 |
| H | -5.78615700 | -4.64072700 | -3.04829000 |

#### 34-ts-r

|   |             |             |             |
|---|-------------|-------------|-------------|
| C | -1.97680600 | -1.53563900 | 1.40471400  |
| C | -3.28126400 | -1.66961300 | 2.14021000  |
| C | -3.71590600 | 0.49403400  | 1.33947900  |
| C | -2.80343100 | 0.42121200  | 0.12191400  |
| C | -0.47925400 | -0.66430200 | 0.07103600  |
| H | -3.66455100 | -2.68587400 | 2.02394400  |
| H | -4.55647800 | 1.15711000  | 1.12904000  |
| H | -2.30083800 | 1.37778800  | -0.00367200 |
| N | -0.90238600 | -2.24277300 | 1.60847500  |
| N | 0.01805900  | -1.69492700 | 0.76406700  |
| N | -1.76195800 | -0.56023100 | 0.47558200  |
| H | -3.15152800 | 0.88961300  | 2.19656600  |
| H | -3.09223000 | -1.48137800 | 3.20585100  |
| O | -4.25456300 | -0.78421900 | 1.63703200  |
| C | -3.52444000 | 0.02336100  | -1.19040000 |

|   |             |             |             |
|---|-------------|-------------|-------------|
| H | -4.55735900 | 0.37939700  | -1.12389200 |
| H | -3.03029600 | 0.56233000  | -2.00041800 |
| C | -3.49813500 | -1.45617300 | -1.49800600 |
| C | -4.46103200 | -2.33249100 | -0.98863100 |
| C | -2.46407500 | -1.97687000 | -2.28268600 |
| C | -4.38769300 | -3.69843900 | -1.25281900 |
| H | -5.26210100 | -1.93910400 | -0.37009200 |
| C | -2.39189600 | -3.34200100 | -2.55326800 |
| H | -1.71593600 | -1.29666400 | -2.68559900 |
| C | -3.35255900 | -4.20776900 | -2.03453300 |
| H | -5.14328500 | -4.36626300 | -0.85087600 |
| H | -1.58627900 | -3.72829800 | -3.17086100 |
| H | -3.29810100 | -5.27142000 | -2.24290900 |
| C | 1.37190100  | -2.17154100 | 0.81032700  |
| C | 2.19086900  | -1.69684600 | 1.83758800  |
| C | 1.80322100  | -3.06399900 | -0.17198500 |
| C | 3.51681200  | -2.12947800 | 1.83892800  |
| C | 3.13674500  | -3.46615900 | -0.12572300 |
| C | 4.00782600  | -2.99787700 | 0.86132200  |
| H | 4.18344400  | -1.77353400 | 2.62096400  |
| H | 3.50577900  | -4.15318600 | -0.88274600 |
| C | 1.65638100  | -0.77357100 | 2.90063100  |
| H | 1.02397800  | 0.01448900  | 2.47612900  |
| H | 1.04774400  | -1.33381200 | 3.61813200  |
| H | 2.47998600  | -0.30728200 | 3.44507600  |
| C | 5.46032200  | -3.39615100 | 0.85689400  |
| H | 6.05690100  | -2.64389000 | 0.33007300  |
| H | 5.85179500  | -3.47415100 | 1.87359600  |
| H | 5.60833500  | -4.35245900 | 0.35126900  |
| C | 0.86832700  | -3.51132600 | -1.26139800 |
| H | -0.07641600 | -3.88053600 | -0.85162400 |
| H | 0.62807500  | -2.66901700 | -1.92212800 |
| H | 1.32275300  | -4.29950200 | -1.86340100 |
| C | 0.14174100  | 0.19153300  | -0.99981000 |
| O | -0.62983900 | 1.01570400  | -1.54357200 |
| C | 1.52565500  | 0.16656200  | -1.21601300 |
| H | 1.84231700  | 0.65860800  | -2.12867600 |
| H | 2.17072600  | -0.61417400 | -0.83769700 |
| C | -0.06368700 | 2.63980100  | 0.61976100  |
| O | -0.25573100 | 1.70220000  | 1.42973900  |
| C | 1.15741500  | 2.79867900  | -0.09630900 |
| C | 2.12309500  | 1.80503100  | 0.02967300  |
| H | 1.27774100  | 3.62373000  | -0.78752000 |
| H | 2.03306700  | 1.18144900  | 0.91591200  |

|   |             |            |             |
|---|-------------|------------|-------------|
| C | 3.51043200  | 1.93315900 | -0.47948400 |
| C | 4.52135200  | 1.16723500 | 0.11307900  |
| C | 3.84830500  | 2.78314500 | -1.53959700 |
| C | 5.83852900  | 1.25798600 | -0.32682700 |
| H | 4.26308500  | 0.49129700 | 0.92569400  |
| C | 5.16434300  | 2.87502700 | -1.98101100 |
| H | 3.07539600  | 3.36885900 | -2.02869900 |
| C | 6.16500300  | 2.11548700 | -1.37520100 |
| H | 6.60943800  | 0.65981000 | 0.14916000  |
| H | 5.41053600  | 3.53911400 | -2.80359700 |
| H | 7.19054700  | 2.18889100 | -1.72233800 |
| C | -1.17610800 | 3.62895600 | 0.40723200  |
| C | -1.34725400 | 4.31116600 | -0.80129500 |
| C | -2.09721600 | 3.83339900 | 1.43982600  |
| C | -2.40845700 | 5.19665100 | -0.96596900 |
| H | -0.66906800 | 4.11667300 | -1.62584000 |
| C | -3.15586400 | 4.72227000 | 1.27838800  |
| H | -1.96321800 | 3.28681700 | 2.36850900  |
| C | -3.31191100 | 5.40830300 | 0.07462000  |
| H | -2.53807400 | 5.71345300 | -1.91166500 |
| H | -3.86021100 | 4.88074900 | 2.08909400  |
| H | -4.13833500 | 6.09989400 | -0.05516700 |

#### 34-ts-s

|   |             |             |             |
|---|-------------|-------------|-------------|
| C | -2.32049400 | 1.09812400  | 0.58807200  |
| C | -3.29168100 | 2.24523900  | 0.55793300  |
| C | -2.36310900 | 2.67001100  | -1.57238400 |
| C | -1.96834700 | 1.22784800  | -1.87065400 |
| C | -0.83225900 | -0.30033300 | -0.16920200 |
| H | -4.25202700 | 1.92539600  | 0.97026800  |
| H | -2.61931100 | 3.18414400  | -2.49974600 |
| H | -1.00909900 | 1.20781000  | -2.38548500 |
| N | -1.86399600 | 0.49167500  | 1.64943500  |
| N | -0.94309900 | -0.38797400 | 1.15643300  |
| N | -1.73093300 | 0.62469000  | -0.54574200 |
| H | -1.52033600 | 3.18373000  | -1.08948000 |
| H | -2.88594800 | 3.04858700  | 1.18779200  |
| O | -3.52384800 | 2.69771700  | -0.75608400 |
| C | -3.02814600 | 0.44031100  | -2.67361900 |
| H | -3.45562100 | 1.12903200  | -3.40914000 |
| H | -2.49516600 | -0.34532100 | -3.21082900 |
| C | -4.12428400 | -0.19245800 | -1.84822300 |
| C | -5.34160800 | 0.45146000  | -1.61218800 |
| C | -3.91836600 | -1.46240200 | -1.29925600 |

|   |             |             |             |
|---|-------------|-------------|-------------|
| C | -6.32771000 | -0.15547000 | -0.83788400 |
| H | -5.50955500 | 1.43914400  | -2.03087600 |
| C | -4.90350100 | -2.07360000 | -0.52618000 |
| H | -2.97343200 | -1.96778200 | -1.49360600 |
| C | -6.11090100 | -1.41897000 | -0.29103500 |
| H | -7.26894600 | 0.35684300  | -0.66482100 |
| H | -4.73108800 | -3.06316000 | -0.11275300 |
| H | -6.88072700 | -1.89314900 | 0.30925200  |
| C | -0.30513600 | -1.31083400 | 2.05938400  |
| C | 0.73971300  | -0.84570800 | 2.85983200  |
| C | -0.78401900 | -2.62265100 | 2.10801000  |
| C | 1.31651500  | -1.75603800 | 3.74558000  |
| C | -0.17126800 | -3.49300700 | 3.00571800  |
| C | 0.87432200  | -3.07658800 | 3.83345000  |
| H | 2.13609000  | -1.42341600 | 4.37730900  |
| H | -0.52180900 | -4.52039500 | 3.06258400  |
| C | 1.26756600  | 0.55396500  | 2.71340700  |
| H | 1.91309700  | 0.81372900  | 3.55397400  |
| H | 1.85965000  | 0.63948700  | 1.79294500  |
| H | 0.46224200  | 1.29017200  | 2.64973700  |
| C | 1.49375500  | -4.03307500 | 4.81861000  |
| H | 1.55229900  | -5.04194700 | 4.40365900  |
| H | 2.49888700  | -3.71368200 | 5.10121100  |
| H | 0.89130000  | -4.08647100 | 5.73103900  |
| C | -1.89861600 | -3.07500100 | 1.20568200  |
| H | -2.71796600 | -2.35009400 | 1.19216000  |
| H | -1.53939100 | -3.18756200 | 0.17544700  |
| H | -2.29206900 | -4.03860700 | 1.53279100  |
| C | 0.01900000  | -1.10037500 | -1.12028300 |
| O | -0.46077700 | -1.22857000 | -2.26873800 |
| C | 1.28322200  | -1.52898200 | -0.68931800 |
| H | 1.70619900  | -2.36528600 | -1.23175700 |
| H | 1.58220300  | -1.41621200 | 0.34500500  |
| C | 1.88893300  | 1.90313700  | -0.50501000 |
| O | 0.70990300  | 1.79996200  | -0.91478900 |
| C | 2.88697100  | 0.94722600  | -0.83017300 |
| C | 2.55151900  | -0.10240200 | -1.68771200 |
| H | 3.84986000  | 0.97627400  | -0.33451100 |
| H | 1.72548500  | 0.07964200  | -2.37531600 |
| C | 3.58456300  | -1.03388100 | -2.20512700 |
| C | 3.41303400  | -1.60467300 | -3.47214800 |
| C | 4.72445000  | -1.37142600 | -1.46542700 |
| C | 4.36518500  | -2.47242600 | -3.99829200 |
| H | 2.51981200  | -1.36309100 | -4.04243500 |

|   |            |             |             |
|---|------------|-------------|-------------|
| C | 5.67534200 | -2.24168200 | -1.98865200 |
| H | 4.86150600 | -0.96097800 | -0.46927000 |
| C | 5.50174200 | -2.79218600 | -3.25825000 |
| H | 4.21924600 | -2.90092300 | -4.98480400 |
| H | 6.55323400 | -2.49518000 | -1.40287800 |
| H | 6.24436500 | -3.47118200 | -3.66452200 |
| C | 2.22921200 | 3.05114100  | 0.40484700  |
| C | 3.53548900 | 3.52198200  | 0.56860000  |
| C | 1.18974600 | 3.67640500  | 1.10136600  |
| C | 3.79659500 | 4.59215800  | 1.42051600  |
| H | 4.34930700 | 3.06722700  | 0.01224900  |
| C | 1.44979000 | 4.73818700  | 1.96080600  |
| H | 0.17917300 | 3.30354800  | 0.95951600  |
| C | 2.75630300 | 5.19889300  | 2.12189000  |
| H | 4.81269300 | 4.95649100  | 1.53353100  |
| H | 0.63630100 | 5.20950500  | 2.50343000  |
| H | 2.96239400 | 6.03055700  | 2.78821300  |

**35-r**

|   |             |             |             |
|---|-------------|-------------|-------------|
| C | -2.52243800 | -0.31371400 | 1.30275800  |
| C | -3.81444900 | 0.08546500  | 1.96263700  |
| C | -3.58241200 | 2.10553700  | 0.74624400  |
| C | -2.73725000 | 1.49305500  | -0.36794000 |
| C | -0.76157200 | -0.12026100 | 0.00583200  |
| H | -4.49632800 | -0.76824700 | 1.97528700  |
| H | -4.20680400 | 2.90204200  | 0.33850100  |
| H | -2.01391800 | 2.21192100  | -0.74763500 |
| N | -1.73895100 | -1.28623500 | 1.66331700  |
| N | -0.64905300 | -1.15620600 | 0.84090700  |
| N | -1.96966700 | 0.41591800  | 0.28816900  |
| H | -2.93588300 | 2.52565400  | 1.53125700  |
| H | -3.58517400 | 0.37174100  | 2.99810300  |
| O | -4.46348300 | 1.13580900  | 1.28352900  |
| C | -3.57103200 | 0.96471300  | -1.55838100 |
| H | -4.31513500 | 1.73619500  | -1.78252100 |
| H | -2.87836100 | 0.88651900  | -2.39717200 |
| C | -4.24293900 | -0.37363000 | -1.35631300 |
| C | -5.56911000 | -0.48543300 | -0.92922100 |
| C | -3.51997000 | -1.54050100 | -1.62392000 |
| C | -6.15653700 | -1.73625200 | -0.75754800 |
| H | -6.13668200 | 0.41574600  | -0.71632500 |
| C | -4.10671600 | -2.79366200 | -1.45408100 |
| H | -2.49484700 | -1.43697500 | -1.97628900 |
| C | -5.42538500 | -2.89493700 | -1.01653500 |

|   |             |             |             |
|---|-------------|-------------|-------------|
| H | -7.18750200 | -1.80681300 | -0.42492700 |
| H | -3.54032800 | -3.69299700 | -1.67822500 |
| H | -5.88430400 | -3.86986800 | -0.88632400 |
| C | 0.40866100  | -2.12066500 | 0.99006100  |
| C | 1.22996900  | -2.02078400 | 2.11773000  |
| C | 0.52397500  | -3.14173400 | 0.04592200  |
| C | 2.23082600  | -2.97837200 | 2.26516800  |
| C | 1.55138000  | -4.06781900 | 0.23112300  |
| C | 2.41189100  | -3.99997200 | 1.32790900  |
| H | 2.89117600  | -2.91978500 | 3.12650900  |
| H | 1.67172700  | -4.86718400 | -0.49508900 |
| C | 1.05919300  | -0.89289000 | 3.10003500  |
| H | 1.10734600  | 0.07642900  | 2.58909800  |
| H | 0.08797700  | -0.95052100 | 3.59922600  |
| H | 1.84415000  | -0.92281900 | 3.85665100  |
| C | 3.53928300  | -4.98626600 | 1.48559100  |
| H | 4.46775000  | -4.57186800 | 1.07756700  |
| H | 3.71790200  | -5.21556000 | 2.53850000  |
| H | 3.32913300  | -5.91689700 | 0.95496500  |
| C | -0.43934200 | -3.24887700 | -1.10515700 |
| H | -1.46002500 | -3.36284700 | -0.72593800 |
| H | -0.42650900 | -2.35179000 | -1.73511600 |
| H | -0.20098200 | -4.11541200 | -1.72359200 |
| C | 0.05828000  | 0.35196400  | -1.24896500 |
| O | -0.68681900 | 0.12946200  | -2.27642100 |
| C | 1.49641600  | -0.17583100 | -1.36672400 |
| H | 1.84797700  | 0.28839200  | -2.29521400 |
| H | 1.47753500  | -1.25470100 | -1.53941900 |
| C | 1.17706500  | 2.31310200  | -0.19413700 |
| O | 0.17445400  | 1.84623700  | -0.98968300 |
| C | 2.22358200  | 1.58074200  | 0.21925700  |
| C | 2.46814300  | 0.17375000  | -0.23268800 |
| H | 2.93860100  | 2.03697200  | 0.89600800  |
| H | 2.30496600  | -0.51046300 | 0.60619300  |
| C | 3.89592600  | -0.06875100 | -0.69265800 |
| C | 4.46738700  | -1.33386800 | -0.52863400 |
| C | 4.63845000  | 0.92650900  | -1.33244100 |
| C | 5.75425700  | -1.59960600 | -0.98937700 |
| H | 3.89012500  | -2.11360000 | -0.03424400 |
| C | 5.92690300  | 0.66495800  | -1.79267700 |
| H | 4.19955100  | 1.91206000  | -1.46725800 |
| C | 6.48963400  | -0.59862800 | -1.62189700 |
| H | 6.18471200  | -2.58690200 | -0.85096000 |
| H | 6.49285500  | 1.44982700  | -2.28509100 |



|   |             |             |             |
|---|-------------|-------------|-------------|
| H | 7.49477800  | -0.80126000 | -1.97775400 |
| C | 1.01616500  | 3.74412300  | 0.17503200  |
| C | 2.14011900  | 4.56217900  | 0.34535600  |
| C | -0.25215000 | 4.30647200  | 0.34860000  |
| C | 1.99785500  | 5.89856300  | 0.70354100  |
| H | 3.13017400  | 4.15085700  | 0.17393300  |
| C | -0.39633400 | 5.64427000  | 0.70387100  |
| H | -1.13081300 | 3.68731700  | 0.21681200  |
| C | 0.72849300  | 6.44530900  | 0.88452800  |
| H | 2.88032700  | 6.51850000  | 0.82612000  |
| H | -1.38939100 | 6.06049200  | 0.84015100  |
| H | 0.61741300  | 7.48989800  | 1.15665500  |

**35-s**

|   |             |             |             |
|---|-------------|-------------|-------------|
| C | -2.92943400 | -0.03929700 | 1.27562200  |
| C | -4.26018500 | 0.50003900  | 1.72497400  |
| C | -3.61542400 | 2.48280300  | 0.61183500  |
| C | -2.65546700 | 1.80713600  | -0.36378000 |
| C | -0.99814200 | -0.04335900 | 0.24920300  |
| H | -5.02241100 | -0.27675300 | 1.63305100  |
| H | -4.07089000 | 3.35337700  | 0.13800900  |
| H | -1.78685400 | 2.43937300  | -0.55352900 |
| N | -2.30405000 | -1.07865300 | 1.74970500  |
| N | -1.10085700 | -1.06479400 | 1.09505200  |
| N | -2.16190400 | 0.62074800  | 0.35805300  |
| H | -3.08123900 | 2.80690700  | 1.51644700  |
| H | -4.16939100 | 0.78593000  | 2.78188800  |
| O | -4.67258600 | 1.59611100  | 0.94063100  |
| C | -3.32818800 | 1.40960800  | -1.70262600 |
| H | -4.06089700 | 2.18740100  | -1.94056300 |
| H | -2.54069200 | 1.41963600  | -2.45547200 |
| C | -3.99048300 | 0.05004500  | -1.70497100 |
| C | -5.34865500 | -0.10857400 | -1.41556600 |
| C | -3.22579200 | -1.08593700 | -1.99804300 |
| C | -5.93051700 | -1.37416300 | -1.40537000 |
| H | -5.94665800 | 0.76667600  | -1.18024400 |
| C | -3.80838700 | -2.35201600 | -1.99052000 |
| H | -2.16968000 | -0.94920200 | -2.22936500 |
| C | -5.16098300 | -2.50055000 | -1.69024400 |
| H | -6.98685900 | -1.48031700 | -1.17839700 |
| H | -3.20738200 | -3.22512300 | -2.22798800 |
| H | -5.61405400 | -3.48688200 | -1.68463100 |
| C | -0.08913500 | -2.01221200 | 1.48036200  |
| C | 0.82108400  | -1.62010900 | 2.46276900  |

|   |             |             |             |
|---|-------------|-------------|-------------|
| C | -0.06884700 | -3.26128100 | 0.86116300  |
| C | 1.80339300  | -2.54142800 | 2.82169600  |
| C | 0.93103900  | -4.14804800 | 1.25557400  |
| C | 1.87032600  | -3.80548400 | 2.23153900  |
| H | 2.53490500  | -2.26310400 | 3.57599200  |
| H | 0.98160500  | -5.12734400 | 0.78630300  |
| C | 0.75715600  | -0.24110800 | 3.06363300  |
| H | 1.52148800  | -0.12083100 | 3.83222500  |
| H | 0.91236600  | 0.52709200  | 2.29575900  |
| H | -0.22228600 | -0.05653900 | 3.51641700  |
| C | 2.92469700  | -4.79528300 | 2.65286800  |
| H | 3.27876100  | -5.37866200 | 1.79973900  |
| H | 3.77896400  | -4.29257400 | 3.11053600  |
| H | 2.51823400  | -5.49876900 | 3.38645900  |
| C | -1.07435700 | -3.60337200 | -0.20356800 |
| H | -2.09712000 | -3.50198100 | 0.17212100  |
| H | -0.98095000 | -2.92410100 | -1.05891000 |
| H | -0.93084200 | -4.62463800 | -0.55903100 |
| C | 0.10192100  | 0.40194800  | -0.76027300 |
| O | -0.42127700 | 0.62077500  | -1.91412700 |
| C | 1.36179400  | -0.47883100 | -0.75592100 |
| H | 1.11776700  | -1.47524700 | -1.13978500 |
| H | 1.78972600  | -0.58608500 | 0.24646500  |
| C | 1.65880300  | 2.25610800  | -0.43085000 |
| O | 0.50023800  | 1.67393200  | -0.01968200 |
| C | 2.57016600  | 1.62832600  | -1.19227700 |
| C | 2.38780400  | 0.21081600  | -1.66663900 |
| H | 3.47891500  | 2.15100200  | -1.46919000 |
| H | 1.96232600  | 0.21689100  | -2.67924700 |
| C | 3.68012100  | -0.57892200 | -1.69812900 |
| C | 3.91979000  | -1.49673500 | -2.72360800 |
| C | 4.63006700  | -0.45011700 | -0.68016300 |
| C | 5.08007600  | -2.26780300 | -2.73608700 |
| H | 3.18726400  | -1.60594800 | -3.51975400 |
| C | 5.79216400  | -1.21745500 | -0.68912900 |
| H | 4.45250900  | 0.26234400  | 0.12196300  |
| C | 6.02103600  | -2.12955300 | -1.71796300 |
| H | 5.25057500  | -2.97444000 | -3.54245700 |
| H | 6.52146300  | -1.10230500 | 0.10684000  |
| H | 6.92728600  | -2.72663700 | -1.72707400 |
| C | 1.80541000  | 3.63808300  | 0.09648800  |
| C | 2.74162700  | 4.53839000  | -0.42951900 |
| C | 0.98952100  | 4.06152800  | 1.15289600  |
| C | 2.87162600  | 5.81646000  | 0.10183700  |

|   |            |            |             |
|---|------------|------------|-------------|
| H | 3.36055300 | 4.24886400 | -1.27240500 |
| C | 1.12103200 | 5.34214300 | 1.68353600  |
| H | 0.25316400 | 3.37503700 | 1.55616000  |
| C | 2.06436900 | 6.22409000 | 1.16355700  |
| H | 3.59989600 | 6.50124900 | -0.32100600 |
| H | 0.48406200 | 5.65004900 | 2.50685300  |
| H | 2.16690300 | 7.22270500 | 1.57574100  |

**36-ts-r**

|   |             |             |             |
|---|-------------|-------------|-------------|
| C | -2.01901600 | -1.25380700 | 1.56668800  |
| C | -3.29300900 | -1.28831100 | 2.36150000  |
| C | -3.67472900 | 0.88216700  | 1.55195500  |
| C | -2.71765600 | 0.79664800  | 0.36343300  |
| C | -0.47432400 | -0.43089800 | 0.18923100  |
| H | -3.73214200 | -2.28678900 | 2.31082400  |
| H | -4.50172500 | 1.55045600  | 1.30450700  |
| H | -2.19535000 | 1.75070100  | 0.27982100  |
| N | -1.03142700 | -2.09124700 | 1.65540700  |
| N | -0.09603900 | -1.56557000 | 0.79527600  |
| N | -1.72221900 | -0.23407000 | 0.69927100  |
| H | -3.14329500 | 1.28610300  | 2.42668400  |
| H | -3.05242000 | -1.06202200 | 3.41024300  |
| O | -4.24268000 | -0.37746400 | 1.85992000  |
| C | -3.38887100 | 0.48731500  | -0.98979100 |
| H | -4.18709900 | 1.22475300  | -1.12764700 |
| H | -2.63182900 | 0.65553600  | -1.76128400 |
| C | -3.93028900 | -0.91763800 | -1.12860300 |
| C | -5.26328600 | -1.22435400 | -0.84196700 |
| C | -3.07970300 | -1.94601800 | -1.54912800 |
| C | -5.73323100 | -2.52983800 | -0.95337300 |
| H | -5.93289600 | -0.43261600 | -0.51572300 |
| C | -3.54588800 | -3.25542100 | -1.65513200 |
| H | -2.05230900 | -1.69989600 | -1.81095300 |
| C | -4.87335200 | -3.55175700 | -1.35475100 |
| H | -6.77171700 | -2.75104500 | -0.72680900 |
| H | -2.87451300 | -4.04278000 | -1.98612900 |
| H | -5.24001500 | -4.56974700 | -1.44110700 |
| C | 1.17163900  | -2.23336100 | 0.70841900  |
| C | 2.06512600  | -2.08043000 | 1.77416600  |
| C | 1.43921000  | -3.04736500 | -0.39452500 |
| C | 3.28557200  | -2.74847900 | 1.69368900  |
| C | 2.68086100  | -3.68360700 | -0.43658600 |
| C | 3.61485700  | -3.54099900 | 0.59083400  |
| H | 4.00101300  | -2.63802400 | 2.50495100  |

|   |             |             |             |
|---|-------------|-------------|-------------|
| H | 2.91749000  | -4.31554400 | -1.28883400 |
| C | 1.71211700  | -1.22641300 | 2.96364400  |
| H | 1.29973000  | -0.26037400 | 2.65209300  |
| H | 0.95097100  | -1.71546000 | 3.57892000  |
| H | 2.59314800  | -1.04443900 | 3.58087200  |
| C | 4.96644500  | -4.20046400 | 0.50333600  |
| H | 5.70382300  | -3.50321200 | 0.09114500  |
| H | 5.32043000  | -4.50792600 | 1.48999400  |
| H | 4.93950100  | -5.07750700 | -0.14652700 |
| C | 0.41516800  | -3.23945000 | -1.48112200 |
| H | -0.54237400 | -3.55046500 | -1.04922600 |
| H | 0.23340800  | -2.30901000 | -2.03125300 |
| H | 0.74453300  | -4.00679100 | -2.18380500 |
| C | 0.12331500  | 0.44303000  | -1.54174400 |
| O | -0.49773500 | -0.14223200 | -2.43496000 |
| C | 1.63682400  | 0.36420800  | -1.46556900 |
| H | 1.98248100  | 0.93105900  | -2.34061200 |
| H | 1.94709800  | -0.67454500 | -1.60208800 |
| C | 0.29113800  | 2.51718300  | -0.32632500 |
| O | -0.36127500 | 1.74409600  | -1.25554500 |
| C | 1.48699700  | 2.20149800  | 0.18773400  |
| C | 2.25150500  | 0.96831900  | -0.19997300 |
| H | 1.93908100  | 2.87741100  | 0.90523800  |
| H | 2.16542900  | 0.23288100  | 0.60922500  |
| C | 3.73481400  | 1.21322200  | -0.41190400 |
| C | 4.63925500  | 0.17075600  | -0.19140100 |
| C | 4.21761300  | 2.43645700  | -0.88259800 |
| C | 5.99979000  | 0.34784800  | -0.42815500 |
| H | 4.26667100  | -0.78573500 | 0.17043400  |
| C | 5.57932200  | 2.61744100  | -1.11761100 |
| H | 3.52035100  | 3.25025400  | -1.06475900 |
| C | 6.47438700  | 1.57454300  | -0.89018900 |
| H | 6.69077900  | -0.47013900 | -0.24792900 |
| H | 5.94124700  | 3.57500000  | -1.47905200 |
| H | 7.53506100  | 1.71674600  | -1.07094500 |
| C | -0.48815200 | 3.73225500  | 0.01560700  |
| C | -0.22814900 | 4.45699300  | 1.18620200  |
| C | -1.51211300 | 4.16945100  | -0.83457700 |
| C | -0.95479800 | 5.60367100  | 1.48346700  |
| H | 0.53131400  | 4.11372300  | 1.88089100  |
| C | -2.24131700 | 5.31641100  | -0.53112500 |
| H | -1.73122200 | 3.60600800  | -1.73510000 |
| C | -1.96320600 | 6.04025500  | 0.62515100  |
| H | -0.74121300 | 6.15116400  | 2.39571600  |

|   |             |            |             |
|---|-------------|------------|-------------|
| H | -3.02841300 | 5.64422600 | -1.20260000 |
| H | -2.53291600 | 6.93267500 | 0.86238700  |

**36-ts-s**

|   |             |             |             |
|---|-------------|-------------|-------------|
| C | -2.61522600 | 0.12498200  | 1.20703000  |
| C | -3.98956500 | 0.50673200  | 1.68294200  |
| C | -4.13580500 | 1.70891300  | -0.33859200 |
| C | -3.13523500 | 0.84437500  | -1.10191500 |
| C | -0.89764800 | -0.01748400 | -0.19785200 |
| H | -4.46852200 | -0.35092200 | 2.16077000  |
| H | -4.88826800 | 2.10096300  | -1.02418900 |
| H | -2.55026400 | 1.44792700  | -1.79849400 |
| N | -1.64377700 | -0.33977200 | 1.93354300  |
| N | -0.59587700 | -0.41918600 | 1.04507200  |
| N | -2.20340600 | 0.33708800  | -0.08246500 |
| H | -3.63071600 | 2.55270000  | 0.15486200  |
| H | -3.88627800 | 1.31232700  | 2.42294500  |
| O | -4.81935700 | 0.91380600  | 0.61549500  |
| C | -3.83538300 | -0.29967700 | -1.88394900 |
| H | -4.84277100 | 0.04481000  | -2.13844300 |
| H | -3.27564100 | -0.43898800 | -2.80860300 |
| C | -3.91542100 | -1.62470500 | -1.16267100 |
| C | -5.01454400 | -1.96724000 | -0.36935300 |
| C | -2.86695700 | -2.54163900 | -1.29368400 |
| C | -5.06506100 | -3.19776500 | 0.28173600  |
| H | -5.82950400 | -1.25829100 | -0.25942700 |
| C | -2.92197300 | -3.77761000 | -0.65238000 |
| H | -2.01220800 | -2.26885900 | -1.91075400 |
| C | -4.01888900 | -4.10756600 | 0.14132600  |
| H | -5.92660800 | -3.45000800 | 0.89223200  |
| H | -2.10786400 | -4.48626900 | -0.77435800 |
| H | -4.06169600 | -5.06989000 | 0.64155700  |
| C | 0.67085300  | -0.85958300 | 1.56502200  |
| C | 1.41948900  | 0.03810100  | 2.33278400  |
| C | 1.05818900  | -2.18795000 | 1.36587800  |
| C | 2.60611400  | -0.43084200 | 2.89854200  |
| C | 2.25794800  | -2.60620400 | 1.94089700  |
| C | 3.03636600  | -1.74690800 | 2.71880300  |
| H | 3.20528700  | 0.24898300  | 3.49953900  |
| H | 2.58202100  | -3.63299500 | 1.79064100  |
| C | 0.93841800  | 1.44291300  | 2.57275400  |
| H | 1.75424200  | 2.07390500  | 2.93066300  |
| H | 0.53402700  | 1.88468700  | 1.65893300  |
| H | 0.14108500  | 1.45148200  | 3.32305500  |

|   |             |             |             |
|---|-------------|-------------|-------------|
| C | 4.29906100  | -2.23749100 | 3.37945400  |
| H | 4.72537400  | -3.08591100 | 2.83899100  |
| H | 5.04996500  | -1.44525800 | 3.43495500  |
| H | 4.09295200  | -2.56667900 | 4.40312200  |
| C | 0.18780400  | -3.13255900 | 0.58352300  |
| H | -0.80824300 | -3.19815700 | 1.03203900  |
| H | 0.04560500  | -2.79109900 | -0.44784100 |
| H | 0.62619700  | -4.13160100 | 0.55856600  |
| C | -0.10499000 | 0.18983200  | -2.01552500 |
| O | -0.96379400 | -0.20548000 | -2.80836300 |
| C | 1.24787500  | -0.52844700 | -1.91000100 |
| H | 1.25155600  | -1.29196000 | -2.69279500 |
| H | 1.34377400  | -1.02645200 | -0.94455800 |
| C | 0.98970800  | 2.16988900  | -1.17157000 |
| O | -0.01057700 | 1.62482100  | -1.94179200 |
| C | 2.20719100  | 1.61387800  | -1.17587100 |
| C | 2.44516100  | 0.42490700  | -2.06999100 |
| H | 3.00602100  | 2.00444400  | -0.55594800 |
| H | 2.46762600  | 0.77503200  | -3.11189300 |
| C | 3.73809800  | -0.30301500 | -1.78119100 |
| C | 4.61884500  | -0.65079400 | -2.80555300 |
| C | 4.04439100  | -0.68011200 | -0.47021200 |
| C | 5.78765400  | -1.35829300 | -2.52694100 |
| H | 4.38855100  | -0.36495300 | -3.82877100 |
| C | 5.20939500  | -1.38605400 | -0.18837900 |
| H | 3.35992200  | -0.41832400 | 0.33436600  |
| C | 6.08649500  | -1.72718400 | -1.21778300 |
| H | 6.46470500  | -1.61933700 | -3.33431300 |
| H | 5.43233100  | -1.66938000 | 0.83633400  |
| H | 6.99662000  | -2.27669200 | -0.99966600 |
| C | 0.57831000  | 3.36667000  | -0.40775900 |
| C | 1.52519800  | 4.23756700  | 0.14848900  |
| C | -0.77970500 | 3.62414200  | -0.19397300 |
| C | 1.11996600  | 5.31255300  | 0.93000300  |
| H | 2.58266100  | 4.07823900  | -0.03632400 |
| C | -1.18482100 | 4.70459200  | 0.58490900  |
| H | -1.51220500 | 2.96403800  | -0.64274200 |
| C | -0.23651900 | 5.54830200  | 1.15672600  |
| H | 1.86487100  | 5.97668200  | 1.35639200  |
| H | -2.24309200 | 4.88769600  | 0.74429500  |
| H | -0.54899500 | 6.39064700  | 1.76504800  |
